# Supplementary material
Source: publisher site journal article supplement (https://www.spandidos-publications.com/2813/downloadSupplementary)
Supplement: Supplementary file 1 [file downloadSupplementary]

## Sheet: Supplement 2 (8)
Table SII. CSV files containing TP53 variants after analysis with the GEnome MINIng v0.18.3 software.
SAMPLE_ID	gt_depth	gt_ref_depth	gt_alt_depth	gt	gt_qual	variant_id	chrom	start	end	ref	type	sub_type	aaf	num_hom_ref	num_het	num_hom_alt	num_unknown	hwe	gene	exon	transcript	codon_change	aa_change	aa_length	pfam_domain	biotype	impact_so	impact_severity	in_dbsnp	rs_ids	in_esp	aaf_esp_ea	aaf_esp_all	in_1kg	aaf_1kg_eur	aaf_1kg_all	in_exac	aaf_exac_all	aaf_adj_exac_all	aaf_adj_exac_nfe	in_omim	rmsk	in_cpg_island	in_segdup	cadd_raw	cadd_scaled	fitcons	clinvar_sig	clinvar_disease_name
1.ATR2U	101	96	5	T/T	99.0	687	chr17	7572979	7572980	T	snp	tv	0.00769230769231	64	1	0	1	0.950166157393	TP53	11	ENST00000269305	Acc/Ccc	p.Thr377Pro/c.1129A>C	393	None	protein_coding	missense_variant	MED	1	rs774269719	0	-1.0	-1.0	0	-1.0	-1.0	1	0.0007248	0.000600620641329	0.000316828098126	0	None	0	0	1.32	10.34	0.706548	None	None
10.ATU14	54	53	1	T/T	99.0	687	chr17	7572979	7572980	T	snp	tv	0.00769230769231	64	1	0	1	0.950166157393	TP53	11	ENST00000269305	Acc/Ccc	p.Thr377Pro/c.1129A>C	393	None	protein_coding	missense_variant	MED	1	rs774269719	0	-1.0	-1.0	0	-1.0	-1.0	1	0.0007248	0.000600620641329	0.000316828098126	0	None	0	0	1.32	10.34	0.706548	None	None
17.AUMV1	100	92	8	T/T	99.0	687	chr17	7572979	7572980	T	snp	tv	0.00769230769231	64	1	0	1	0.950166157393	TP53	11	ENST00000269305	Acc/Ccc	p.Thr377Pro/c.1129A>C	393	None	protein_coding	missense_variant	MED	1	rs774269719	0	-1.0	-1.0	0	-1.0	-1.0	1	0.0007248	0.000600620641329	0.000316828098126	0	None	0	0	1.32	10.34	0.706548	None	None
2.ATR2U	151	146	5	T/T	99.0	687	chr17	7572979	7572980	T	snp	tv	0.00769230769231	64	1	0	1	0.950166157393	TP53	11	ENST00000269305	Acc/Ccc	p.Thr377Pro/c.1129A>C	393	None	protein_coding	missense_variant	MED	1	rs774269719	0	-1.0	-1.0	0	-1.0	-1.0	1	0.0007248	0.000600620641329	0.000316828098126	0	None	0	0	1.32	10.34	0.706548	None	None
22.AUMV1	167	129	38	T/T	87.0	687	chr17	7572979	7572980	T	snp	tv	0.00769230769231	64	1	0	1	0.950166157393	TP53	11	ENST00000269305	Acc/Ccc	p.Thr377Pro/c.1129A>C	393	None	protein_coding	missense_variant	MED	1	rs774269719	0	-1.0	-1.0	0	-1.0	-1.0	1	0.0007248	0.000600620641329	0.000316828098126	0	None	0	0	1.32	10.34	0.706548	None	None
26.ATU14	51	47	4	T/T	61.0	687	chr17	7572979	7572980	T	snp	tv	0.00769230769231	64	1	0	1	0.950166157393	TP53	11	ENST00000269305	Acc/Ccc	p.Thr377Pro/c.1129A>C	393	None	protein_coding	missense_variant	MED	1	rs774269719	0	-1.0	-1.0	0	-1.0	-1.0	1	0.0007248	0.000600620641329	0.000316828098126	0	None	0	0	1.32	10.34	0.706548	None	None
35.ATU14	20	19	1	T/T	42.0	687	chr17	7572979	7572980	T	snp	tv	0.00769230769231	64	1	0	1	0.950166157393	TP53	11	ENST00000269305	Acc/Ccc	p.Thr377Pro/c.1129A>C	393	None	protein_coding	missense_variant	MED	1	rs774269719	0	-1.0	-1.0	0	-1.0	-1.0	1	0.0007248	0.000600620641329	0.000316828098126	0	None	0	0	1.32	10.34	0.706548	None	None
37.ATU14	26	24	2	T/T	44.0	687	chr17	7572979	7572980	T	snp	tv	0.00769230769231	64	1	0	1	0.950166157393	TP53	11	ENST00000269305	Acc/Ccc	p.Thr377Pro/c.1129A>C	393	None	protein_coding	missense_variant	MED	1	rs774269719	0	-1.0	-1.0	0	-1.0	-1.0	1	0.0007248	0.000600620641329	0.000316828098126	0	None	0	0	1.32	10.34	0.706548	None	None
45.ATU14	49	48	1	T/T	99.0	687	chr17	7572979	7572980	T	snp	tv	0.00769230769231	64	1	0	1	0.950166157393	TP53	11	ENST00000269305	Acc/Ccc	p.Thr377Pro/c.1129A>C	393	None	protein_coding	missense_variant	MED	1	rs774269719	0	-1.0	-1.0	0	-1.0	-1.0	1	0.0007248	0.000600620641329	0.000316828098126	0	None	0	0	1.32	10.34	0.706548	None	None
5.ATR2U	94	89	5	T/T	99.0	687	chr17	7572979	7572980	T	snp	tv	0.00769230769231	64	1	0	1	0.950166157393	TP53	11	ENST00000269305	Acc/Ccc	p.Thr377Pro/c.1129A>C	393	None	protein_coding	missense_variant	MED	1	rs774269719	0	-1.0	-1.0	0	-1.0	-1.0	1	0.0007248	0.000600620641329	0.000316828098126	0	None	0	0	1.32	10.34	0.706548	None	None
63n.AUMV1	53	47	6	T/T	37.0	687	chr17	7572979	7572980	T	snp	tv	0.00769230769231	64	1	0	1	0.950166157393	TP53	11	ENST00000269305	Acc/Ccc	p.Thr377Pro/c.1129A>C	393	None	protein_coding	missense_variant	MED	1	rs774269719	0	-1.0	-1.0	0	-1.0	-1.0	1	0.0007248	0.000600620641329	0.000316828098126	0	None	0	0	1.32	10.34	0.706548	None	None
7.A8P8B	103	98	5	T/T	99.0	687	chr17	7572979	7572980	T	snp	tv	0.00769230769231	64	1	0	1	0.950166157393	TP53	11	ENST00000269305	Acc/Ccc	p.Thr377Pro/c.1129A>C	393	None	protein_coding	missense_variant	MED	1	rs774269719	0	-1.0	-1.0	0	-1.0	-1.0	1	0.0007248	0.000600620641329	0.000316828098126	0	None	0	0	1.32	10.34	0.706548	None	None
72.ATR2U	138	126	12	T/T	99.0	687	chr17	7572979	7572980	T	snp	tv	0.00769230769231	64	1	0	1	0.950166157393	TP53	11	ENST00000269305	Acc/Ccc	p.Thr377Pro/c.1129A>C	393	None	protein_coding	missense_variant	MED	1	rs774269719	0	-1.0	-1.0	0	-1.0	-1.0	1	0.0007248	0.000600620641329	0.000316828098126	0	None	0	0	1.32	10.34	0.706548	None	None
82.ATR2U	125	117	8	T/T	99.0	687	chr17	7572979	7572980	T	snp	tv	0.00769230769231	64	1	0	1	0.950166157393	TP53	11	ENST00000269305	Acc/Ccc	p.Thr377Pro/c.1129A>C	393	None	protein_coding	missense_variant	MED	1	rs774269719	0	-1.0	-1.0	0	-1.0	-1.0	1	0.0007248	0.000600620641329	0.000316828098126	0	None	0	0	1.32	10.34	0.706548	None	None
84.ATR2U	123	113	10	T/T	99.0	687	chr17	7572979	7572980	T	snp	tv	0.00769230769231	64	1	0	1	0.950166157393	TP53	11	ENST00000269305	Acc/Ccc	p.Thr377Pro/c.1129A>C	393	None	protein_coding	missense_variant	MED	1	rs774269719	0	-1.0	-1.0	0	-1.0	-1.0	1	0.0007248	0.000600620641329	0.000316828098126	0	None	0	0	1.32	10.34	0.706548	None	None
91n.AUMV1	29	27	2	T/T	51.0	687	chr17	7572979	7572980	T	snp	tv	0.00769230769231	64	1	0	1	0.950166157393	TP53	11	ENST00000269305	Acc/Ccc	p.Thr377Pro/c.1129A>C	393	None	protein_coding	missense_variant	MED	1	rs774269719	0	-1.0	-1.0	0	-1.0	-1.0	1	0.0007248	0.000600620641329	0.000316828098126	0	None	0	0	1.32	10.34	0.706548	None	None
PS1.A8P8B	64	59	5	T/T	90.0	687	chr17	7572979	7572980	T	snp	tv	0.00769230769231	64	1	0	1	0.950166157393	TP53	11	ENST00000269305	Acc/Ccc	p.Thr377Pro/c.1129A>C	393	None	protein_coding	missense_variant	MED	1	rs774269719	0	-1.0	-1.0	0	-1.0	-1.0	1	0.0007248	0.000600620641329	0.000316828098126	0	None	0	0	1.32	10.34	0.706548	None	None
PS2.A8P8B	66	65	1	T/T	99.0	687	chr17	7572979	7572980	T	snp	tv	0.00769230769231	64	1	0	1	0.950166157393	TP53	11	ENST00000269305	Acc/Ccc	p.Thr377Pro/c.1129A>C	393	None	protein_coding	missense_variant	MED	1	rs774269719	0	-1.0	-1.0	0	-1.0	-1.0	1	0.0007248	0.000600620641329	0.000316828098126	0	None	0	0	1.32	10.34	0.706548	None	None
SA23.ATU14	21	20	1	T/T	47.0	687	chr17	7572979	7572980	T	snp	tv	0.00769230769231	64	1	0	1	0.950166157393	TP53	11	ENST00000269305	Acc/Ccc	p.Thr377Pro/c.1129A>C	393	None	protein_coding	missense_variant	MED	1	rs774269719	0	-1.0	-1.0	0	-1.0	-1.0	1	0.0007248	0.000600620641329	0.000316828098126	0	None	0	0	1.32	10.34	0.706548	None	None
SA36.A8P8B	22	22	0	T/T	66.0	687	chr17	7572979	7572980	T	snp	tv	0.00769230769231	64	1	0	1	0.950166157393	TP53	11	ENST00000269305	Acc/Ccc	p.Thr377Pro/c.1129A>C	393	None	protein_coding	missense_variant	MED	1	rs774269719	0	-1.0	-1.0	0	-1.0	-1.0	1	0.0007248	0.000600620641329	0.000316828098126	0	None	0	0	1.32	10.34	0.706548	None	None
SA38.ATU14	15	15	0	T/T	45.0	687	chr17	7572979	7572980	T	snp	tv	0.00769230769231	64	1	0	1	0.950166157393	TP53	11	ENST00000269305	Acc/Ccc	p.Thr377Pro/c.1129A>C	393	None	protein_coding	missense_variant	MED	1	rs774269719	0	-1.0	-1.0	0	-1.0	-1.0	1	0.0007248	0.000600620641329	0.000316828098126	0	None	0	0	1.32	10.34	0.706548	None	None
SA41.ATU14	69	66	3	T/T	99.0	687	chr17	7572979	7572980	T	snp	tv	0.00769230769231	64	1	0	1	0.950166157393	TP53	11	ENST00000269305	Acc/Ccc	p.Thr377Pro/c.1129A>C	393	None	protein_coding	missense_variant	MED	1	rs774269719	0	-1.0	-1.0	0	-1.0	-1.0	1	0.0007248	0.000600620641329	0.000316828098126	0	None	0	0	1.32	10.34	0.706548	None	None
Y102.ATU14	9	9	0	T/T	27.0	687	chr17	7572979	7572980	T	snp	tv	0.00769230769231	64	1	0	1	0.950166157393	TP53	11	ENST00000269305	Acc/Ccc	p.Thr377Pro/c.1129A>C	393	None	protein_coding	missense_variant	MED	1	rs774269719	0	-1.0	-1.0	0	-1.0	-1.0	1	0.0007248	0.000600620641329	0.000316828098126	0	None	0	0	1.32	10.34	0.706548	None	None
Y105.ATU14	11	11	0	T/T	33.0	687	chr17	7572979	7572980	T	snp	tv	0.00769230769231	64	1	0	1	0.950166157393	TP53	11	ENST00000269305	Acc/Ccc	p.Thr377Pro/c.1129A>C	393	None	protein_coding	missense_variant	MED	1	rs774269719	0	-1.0	-1.0	0	-1.0	-1.0	1	0.0007248	0.000600620641329	0.000316828098126	0	None	0	0	1.32	10.34	0.706548	None	None
Y115B.ATU14	68	63	5	T/T	99.0	687	chr17	7572979	7572980	T	snp	tv	0.00769230769231	64	1	0	1	0.950166157393	TP53	11	ENST00000269305	Acc/Ccc	p.Thr377Pro/c.1129A>C	393	None	protein_coding	missense_variant	MED	1	rs774269719	0	-1.0	-1.0	0	-1.0	-1.0	1	0.0007248	0.000600620641329	0.000316828098126	0	None	0	0	1.32	10.34	0.706548	None	None
Y135.ATU14	144	131	13	T/T	99.0	687	chr17	7572979	7572980	T	snp	tv	0.00769230769231	64	1	0	1	0.950166157393	TP53	11	ENST00000269305	Acc/Ccc	p.Thr377Pro/c.1129A>C	393	None	protein_coding	missense_variant	MED	1	rs774269719	0	-1.0	-1.0	0	-1.0	-1.0	1	0.0007248	0.000600620641329	0.000316828098126	0	None	0	0	1.32	10.34	0.706548	None	None
Y137B.ATU14	36	31	5	T/T	24.0	687	chr17	7572979	7572980	T	snp	tv	0.00769230769231	64	1	0	1	0.950166157393	TP53	11	ENST00000269305	Acc/Ccc	p.Thr377Pro/c.1129A>C	393	None	protein_coding	missense_variant	MED	1	rs774269719	0	-1.0	-1.0	0	-1.0	-1.0	1	0.0007248	0.000600620641329	0.000316828098126	0	None	0	0	1.32	10.34	0.706548	None	None
Y145B.ATU14	168	145	23	T/T	68.0	687	chr17	7572979	7572980	T	snp	tv	0.00769230769231	64	1	0	1	0.950166157393	TP53	11	ENST00000269305	Acc/Ccc	p.Thr377Pro/c.1129A>C	393	None	protein_coding	missense_variant	MED	1	rs774269719	0	-1.0	-1.0	0	-1.0	-1.0	1	0.0007248	0.000600620641329	0.000316828098126	0	None	0	0	1.32	10.34	0.706548	None	None
Y146B.A8P8B	32	31	1	T/T	83.0	687	chr17	7572979	7572980	T	snp	tv	0.00769230769231	64	1	0	1	0.950166157393	TP53	11	ENST00000269305	Acc/Ccc	p.Thr377Pro/c.1129A>C	393	None	protein_coding	missense_variant	MED	1	rs774269719	0	-1.0	-1.0	0	-1.0	-1.0	1	0.0007248	0.000600620641329	0.000316828098126	0	None	0	0	1.32	10.34	0.706548	None	None
Y167B.A8P8B	61	59	2	T/T	99.0	687	chr17	7572979	7572980	T	snp	tv	0.00769230769231	64	1	0	1	0.950166157393	TP53	11	ENST00000269305	Acc/Ccc	p.Thr377Pro/c.1129A>C	393	None	protein_coding	missense_variant	MED	1	rs774269719	0	-1.0	-1.0	0	-1.0	-1.0	1	0.0007248	0.000600620641329	0.000316828098126	0	None	0	0	1.32	10.34	0.706548	None	None
Y169C.ATU14	40	36	4	T/T	69.0	687	chr17	7572979	7572980	T	snp	tv	0.00769230769231	64	1	0	1	0.950166157393	TP53	11	ENST00000269305	Acc/Ccc	p.Thr377Pro/c.1129A>C	393	None	protein_coding	missense_variant	MED	1	rs774269719	0	-1.0	-1.0	0	-1.0	-1.0	1	0.0007248	0.000600620641329	0.000316828098126	0	None	0	0	1.32	10.34	0.706548	None	None
ps6.AUMV1	22	20	2	T/T	29.0	687	chr17	7572979	7572980	T	snp	tv	0.00769230769231	64	1	0	1	0.950166157393	TP53	11	ENST00000269305	Acc/Ccc	p.Thr377Pro/c.1129A>C	393	None	protein_coding	missense_variant	MED	1	rs774269719	0	-1.0	-1.0	0	-1.0	-1.0	1	0.0007248	0.000600620641329	0.000316828098126	0	None	0	0	1.32	10.34	0.706548	None	None
sa40.ATR2U	53	50	3	T/T	99.0	687	chr17	7572979	7572980	T	snp	tv	0.00769230769231	64	1	0	1	0.950166157393	TP53	11	ENST00000269305	Acc/Ccc	p.Thr377Pro/c.1129A>C	393	None	protein_coding	missense_variant	MED	1	rs774269719	0	-1.0	-1.0	0	-1.0	-1.0	1	0.0007248	0.000600620641329	0.000316828098126	0	None	0	0	1.32	10.34	0.706548	None	None
y103.AUMV1	116	106	10	T/T	99.0	687	chr17	7572979	7572980	T	snp	tv	0.00769230769231	64	1	0	1	0.950166157393	TP53	11	ENST00000269305	Acc/Ccc	p.Thr377Pro/c.1129A>C	393	None	protein_coding	missense_variant	MED	1	rs774269719	0	-1.0	-1.0	0	-1.0	-1.0	1	0.0007248	0.000600620641329	0.000316828098126	0	None	0	0	1.32	10.34	0.706548	None	None
y104.ATR2U	10	10	0	T/T	30.0	687	chr17	7572979	7572980	T	snp	tv	0.00769230769231	64	1	0	1	0.950166157393	TP53	11	ENST00000269305	Acc/Ccc	p.Thr377Pro/c.1129A>C	393	None	protein_coding	missense_variant	MED	1	rs774269719	0	-1.0	-1.0	0	-1.0	-1.0	1	0.0007248	0.000600620641329	0.000316828098126	0	None	0	0	1.32	10.34	0.706548	None	None
y109b.AUMV1	13	13	0	T/T	39.0	687	chr17	7572979	7572980	T	snp	tv	0.00769230769231	64	1	0	1	0.950166157393	TP53	11	ENST00000269305	Acc/Ccc	p.Thr377Pro/c.1129A>C	393	None	protein_coding	missense_variant	MED	1	rs774269719	0	-1.0	-1.0	0	-1.0	-1.0	1	0.0007248	0.000600620641329	0.000316828098126	0	None	0	0	1.32	10.34	0.706548	None	None
y128b.AUMV1	93	87	6	T/T	99.0	687	chr17	7572979	7572980	T	snp	tv	0.00769230769231	64	1	0	1	0.950166157393	TP53	11	ENST00000269305	Acc/Ccc	p.Thr377Pro/c.1129A>C	393	None	protein_coding	missense_variant	MED	1	rs774269719	0	-1.0	-1.0	0	-1.0	-1.0	1	0.0007248	0.000600620641329	0.000316828098126	0	None	0	0	1.32	10.34	0.706548	None	None
y132b.AUMV1	19	19	0	T/T	57.0	687	chr17	7572979	7572980	T	snp	tv	0.00769230769231	64	1	0	1	0.950166157393	TP53	11	ENST00000269305	Acc/Ccc	p.Thr377Pro/c.1129A>C	393	None	protein_coding	missense_variant	MED	1	rs774269719	0	-1.0	-1.0	0	-1.0	-1.0	1	0.0007248	0.000600620641329	0.000316828098126	0	None	0	0	1.32	10.34	0.706548	None	None
y147c.AUMV1	90	80	10	T/T	76.0	687	chr17	7572979	7572980	T	snp	tv	0.00769230769231	64	1	0	1	0.950166157393	TP53	11	ENST00000269305	Acc/Ccc	p.Thr377Pro/c.1129A>C	393	None	protein_coding	missense_variant	MED	1	rs774269719	0	-1.0	-1.0	0	-1.0	-1.0	1	0.0007248	0.000600620641329	0.000316828098126	0	None	0	0	1.32	10.34	0.706548	None	None
y162c.ATR2U	27	26	1	T/T	61.0	687	chr17	7572979	7572980	T	snp	tv	0.00769230769231	64	1	0	1	0.950166157393	TP53	11	ENST00000269305	Acc/Ccc	p.Thr377Pro/c.1129A>C	393	None	protein_coding	missense_variant	MED	1	rs774269719	0	-1.0	-1.0	0	-1.0	-1.0	1	0.0007248	0.000600620641329	0.000316828098126	0	None	0	0	1.32	10.34	0.706548	None	None
y179f.AL9E5	131	122	9	T/T	99.0	687	chr17	7572979	7572980	T	snp	tv	0.00769230769231	64	1	0	1	0.950166157393	TP53	11	ENST00000269305	Acc/Ccc	p.Thr377Pro/c.1129A>C	393	None	protein_coding	missense_variant	MED	1	rs774269719	0	-1.0	-1.0	0	-1.0	-1.0	1	0.0007248	0.000600620641329	0.000316828098126	0	None	0	0	1.32	10.34	0.706548	None	None
y183b.AUMV1	71	68	3	T/T	99.0	687	chr17	7572979	7572980	T	snp	tv	0.00769230769231	64	1	0	1	0.950166157393	TP53	11	ENST00000269305	Acc/Ccc	p.Thr377Pro/c.1129A>C	393	None	protein_coding	missense_variant	MED	1	rs774269719	0	-1.0	-1.0	0	-1.0	-1.0	1	0.0007248	0.000600620641329	0.000316828098126	0	None	0	0	1.32	10.34	0.706548	None	None
y188b.AUMV1	35	33	2	T/T	68.0	687	chr17	7572979	7572980	T	snp	tv	0.00769230769231	64	1	0	1	0.950166157393	TP53	11	ENST00000269305	Acc/Ccc	p.Thr377Pro/c.1129A>C	393	None	protein_coding	missense_variant	MED	1	rs774269719	0	-1.0	-1.0	0	-1.0	-1.0	1	0.0007248	0.000600620641329	0.000316828098126	0	None	0	0	1.32	10.34	0.706548	None	None
y199b.AL9E5	112	102	10	T/T	99.0	687	chr17	7572979	7572980	T	snp	tv	0.00769230769231	64	1	0	1	0.950166157393	TP53	11	ENST00000269305	Acc/Ccc	p.Thr377Pro/c.1129A>C	393	None	protein_coding	missense_variant	MED	1	rs774269719	0	-1.0	-1.0	0	-1.0	-1.0	1	0.0007248	0.000600620641329	0.000316828098126	0	None	0	0	1.32	10.34	0.706548	None	None
y3.AUMV1	27	26	1	T/T	66.0	687	chr17	7572979	7572980	T	snp	tv	0.00769230769231	64	1	0	1	0.950166157393	TP53	11	ENST00000269305	Acc/Ccc	p.Thr377Pro/c.1129A>C	393	None	protein_coding	missense_variant	MED	1	rs774269719	0	-1.0	-1.0	0	-1.0	-1.0	1	0.0007248	0.000600620641329	0.000316828098126	0	None	0	0	1.32	10.34	0.706548	None	None
y77.AL9E5	75	67	8	T/T	62.0	687	chr17	7572979	7572980	T	snp	tv	0.00769230769231	64	1	0	1	0.950166157393	TP53	11	ENST00000269305	Acc/Ccc	p.Thr377Pro/c.1129A>C	393	None	protein_coding	missense_variant	MED	1	rs774269719	0	-1.0	-1.0	0	-1.0	-1.0	1	0.0007248	0.000600620641329	0.000316828098126	0	None	0	0	1.32	10.34	0.706548	None	None
y88.AUMV1	18	17	1	T/T	36.0	687	chr17	7572979	7572980	T	snp	tv	0.00769230769231	64	1	0	1	0.950166157393	TP53	11	ENST00000269305	Acc/Ccc	p.Thr377Pro/c.1129A>C	393	None	protein_coding	missense_variant	MED	1	rs774269719	0	-1.0	-1.0	0	-1.0	-1.0	1	0.0007248	0.000600620641329	0.000316828098126	0	None	0	0	1.32	10.34	0.706548	None	None
y68.ATR2U	213	137	76	T/G	99.0	687	chr17	7572979	7572980	T	snp	tv	0.00769230769231	64	1	0	1	0.950166157393	TP53	11	ENST00000269305	Acc/Ccc	p.Thr377Pro/c.1129A>C	393	None	protein_coding	missense_variant	MED	1	rs774269719	0	-1.0	-1.0	0	-1.0	-1.0	1	0.0007248	0.000600620641329	0.000316828098126	0	None	0	0	1.32	10.34	0.706548	None	None
1.ATR2U	234	234	0	G/G	99.0	688	chr17	7574012	7574013	G	snp	ts	0.00769230769231	64	1	0	1	0.950166157393	TP53	10	ENST00000269305	ttC/ttT	p.Phe338Phe/c.1014C>T	393	P53_tetramer	protein_coding	synonymous_variant	LOW	1	rs150293825	1	0.000348837209302	0.000230662771029	0	-1.0	-1.0	1	0.0002142	0.000220675606858	0.00032200686948	0	None	0	0	-0.32	2.46	0.706548	likely-benign	other
10.ATU14	128	128	0	G/G	99.0	688	chr17	7574012	7574013	G	snp	ts	0.00769230769231	64	1	0	1	0.950166157393	TP53	10	ENST00000269305	ttC/ttT	p.Phe338Phe/c.1014C>T	393	P53_tetramer	protein_coding	synonymous_variant	LOW	1	rs150293825	1	0.000348837209302	0.000230662771029	0	-1.0	-1.0	1	0.0002142	0.000220675606858	0.00032200686948	0	None	0	0	-0.32	2.46	0.706548	likely-benign	other
17.AUMV1	181	181	0	G/G	99.0	688	chr17	7574012	7574013	G	snp	ts	0.00769230769231	64	1	0	1	0.950166157393	TP53	10	ENST00000269305	ttC/ttT	p.Phe338Phe/c.1014C>T	393	P53_tetramer	protein_coding	synonymous_variant	LOW	1	rs150293825	1	0.000348837209302	0.000230662771029	0	-1.0	-1.0	1	0.0002142	0.000220675606858	0.00032200686948	0	None	0	0	-0.32	2.46	0.706548	likely-benign	other
2.ATR2U	338	338	0	G/G	99.0	688	chr17	7574012	7574013	G	snp	ts	0.00769230769231	64	1	0	1	0.950166157393	TP53	10	ENST00000269305	ttC/ttT	p.Phe338Phe/c.1014C>T	393	P53_tetramer	protein_coding	synonymous_variant	LOW	1	rs150293825	1	0.000348837209302	0.000230662771029	0	-1.0	-1.0	1	0.0002142	0.000220675606858	0.00032200686948	0	None	0	0	-0.32	2.46	0.706548	likely-benign	other
21.AL9E5	17	17	0	G/G	45.0	688	chr17	7574012	7574013	G	snp	ts	0.00769230769231	64	1	0	1	0.950166157393	TP53	10	ENST00000269305	ttC/ttT	p.Phe338Phe/c.1014C>T	393	P53_tetramer	protein_coding	synonymous_variant	LOW	1	rs150293825	1	0.000348837209302	0.000230662771029	0	-1.0	-1.0	1	0.0002142	0.000220675606858	0.00032200686948	0	None	0	0	-0.32	2.46	0.706548	likely-benign	other
22.AUMV1	242	240	2	G/G	99.0	688	chr17	7574012	7574013	G	snp	ts	0.00769230769231	64	1	0	1	0.950166157393	TP53	10	ENST00000269305	ttC/ttT	p.Phe338Phe/c.1014C>T	393	P53_tetramer	protein_coding	synonymous_variant	LOW	1	rs150293825	1	0.000348837209302	0.000230662771029	0	-1.0	-1.0	1	0.0002142	0.000220675606858	0.00032200686948	0	None	0	0	-0.32	2.46	0.706548	likely-benign	other
26.ATU14	196	196	0	G/G	99.0	688	chr17	7574012	7574013	G	snp	ts	0.00769230769231	64	1	0	1	0.950166157393	TP53	10	ENST00000269305	ttC/ttT	p.Phe338Phe/c.1014C>T	393	P53_tetramer	protein_coding	synonymous_variant	LOW	1	rs150293825	1	0.000348837209302	0.000230662771029	0	-1.0	-1.0	1	0.0002142	0.000220675606858	0.00032200686948	0	None	0	0	-0.32	2.46	0.706548	likely-benign	other
31.ATU14	252	252	0	G/G	99.0	688	chr17	7574012	7574013	G	snp	ts	0.00769230769231	64	1	0	1	0.950166157393	TP53	10	ENST00000269305	ttC/ttT	p.Phe338Phe/c.1014C>T	393	P53_tetramer	protein_coding	synonymous_variant	LOW	1	rs150293825	1	0.000348837209302	0.000230662771029	0	-1.0	-1.0	1	0.0002142	0.000220675606858	0.00032200686948	0	None	0	0	-0.32	2.46	0.706548	likely-benign	other
35.ATU14	57	57	0	G/G	99.0	688	chr17	7574012	7574013	G	snp	ts	0.00769230769231	64	1	0	1	0.950166157393	TP53	10	ENST00000269305	ttC/ttT	p.Phe338Phe/c.1014C>T	393	P53_tetramer	protein_coding	synonymous_variant	LOW	1	rs150293825	1	0.000348837209302	0.000230662771029	0	-1.0	-1.0	1	0.0002142	0.000220675606858	0.00032200686948	0	None	0	0	-0.32	2.46	0.706548	likely-benign	other
37.ATU14	108	108	0	G/G	99.0	688	chr17	7574012	7574013	G	snp	ts	0.00769230769231	64	1	0	1	0.950166157393	TP53	10	ENST00000269305	ttC/ttT	p.Phe338Phe/c.1014C>T	393	P53_tetramer	protein_coding	synonymous_variant	LOW	1	rs150293825	1	0.000348837209302	0.000230662771029	0	-1.0	-1.0	1	0.0002142	0.000220675606858	0.00032200686948	0	None	0	0	-0.32	2.46	0.706548	likely-benign	other
45.ATU14	112	112	0	G/G	99.0	688	chr17	7574012	7574013	G	snp	ts	0.00769230769231	64	1	0	1	0.950166157393	TP53	10	ENST00000269305	ttC/ttT	p.Phe338Phe/c.1014C>T	393	P53_tetramer	protein_coding	synonymous_variant	LOW	1	rs150293825	1	0.000348837209302	0.000230662771029	0	-1.0	-1.0	1	0.0002142	0.000220675606858	0.00032200686948	0	None	0	0	-0.32	2.46	0.706548	likely-benign	other
5.ATR2U	301	301	0	G/G	99.0	688	chr17	7574012	7574013	G	snp	ts	0.00769230769231	64	1	0	1	0.950166157393	TP53	10	ENST00000269305	ttC/ttT	p.Phe338Phe/c.1014C>T	393	P53_tetramer	protein_coding	synonymous_variant	LOW	1	rs150293825	1	0.000348837209302	0.000230662771029	0	-1.0	-1.0	1	0.0002142	0.000220675606858	0.00032200686948	0	None	0	0	-0.32	2.46	0.706548	likely-benign	other
63n.AUMV1	100	100	0	G/G	99.0	688	chr17	7574012	7574013	G	snp	ts	0.00769230769231	64	1	0	1	0.950166157393	TP53	10	ENST00000269305	ttC/ttT	p.Phe338Phe/c.1014C>T	393	P53_tetramer	protein_coding	synonymous_variant	LOW	1	rs150293825	1	0.000348837209302	0.000230662771029	0	-1.0	-1.0	1	0.0002142	0.000220675606858	0.00032200686948	0	None	0	0	-0.32	2.46	0.706548	likely-benign	other
7.A8P8B	183	181	2	G/G	99.0	688	chr17	7574012	7574013	G	snp	ts	0.00769230769231	64	1	0	1	0.950166157393	TP53	10	ENST00000269305	ttC/ttT	p.Phe338Phe/c.1014C>T	393	P53_tetramer	protein_coding	synonymous_variant	LOW	1	rs150293825	1	0.000348837209302	0.000230662771029	0	-1.0	-1.0	1	0.0002142	0.000220675606858	0.00032200686948	0	None	0	0	-0.32	2.46	0.706548	likely-benign	other
72.ATR2U	305	304	1	G/G	99.0	688	chr17	7574012	7574013	G	snp	ts	0.00769230769231	64	1	0	1	0.950166157393	TP53	10	ENST00000269305	ttC/ttT	p.Phe338Phe/c.1014C>T	393	P53_tetramer	protein_coding	synonymous_variant	LOW	1	rs150293825	1	0.000348837209302	0.000230662771029	0	-1.0	-1.0	1	0.0002142	0.000220675606858	0.00032200686948	0	None	0	0	-0.32	2.46	0.706548	likely-benign	other
82.ATR2U	168	168	0	G/G	99.0	688	chr17	7574012	7574013	G	snp	ts	0.00769230769231	64	1	0	1	0.950166157393	TP53	10	ENST00000269305	ttC/ttT	p.Phe338Phe/c.1014C>T	393	P53_tetramer	protein_coding	synonymous_variant	LOW	1	rs150293825	1	0.000348837209302	0.000230662771029	0	-1.0	-1.0	1	0.0002142	0.000220675606858	0.00032200686948	0	None	0	0	-0.32	2.46	0.706548	likely-benign	other
84.ATR2U	254	254	0	G/G	99.0	688	chr17	7574012	7574013	G	snp	ts	0.00769230769231	64	1	0	1	0.950166157393	TP53	10	ENST00000269305	ttC/ttT	p.Phe338Phe/c.1014C>T	393	P53_tetramer	protein_coding	synonymous_variant	LOW	1	rs150293825	1	0.000348837209302	0.000230662771029	0	-1.0	-1.0	1	0.0002142	0.000220675606858	0.00032200686948	0	None	0	0	-0.32	2.46	0.706548	likely-benign	other
91n.AUMV1	50	50	0	G/G	99.0	688	chr17	7574012	7574013	G	snp	ts	0.00769230769231	64	1	0	1	0.950166157393	TP53	10	ENST00000269305	ttC/ttT	p.Phe338Phe/c.1014C>T	393	P53_tetramer	protein_coding	synonymous_variant	LOW	1	rs150293825	1	0.000348837209302	0.000230662771029	0	-1.0	-1.0	1	0.0002142	0.000220675606858	0.00032200686948	0	None	0	0	-0.32	2.46	0.706548	likely-benign	other
BS2.ATU14	49	49	0	G/G	99.0	688	chr17	7574012	7574013	G	snp	ts	0.00769230769231	64	1	0	1	0.950166157393	TP53	10	ENST00000269305	ttC/ttT	p.Phe338Phe/c.1014C>T	393	P53_tetramer	protein_coding	synonymous_variant	LOW	1	rs150293825	1	0.000348837209302	0.000230662771029	0	-1.0	-1.0	1	0.0002142	0.000220675606858	0.00032200686948	0	None	0	0	-0.32	2.46	0.706548	likely-benign	other
PS1.A8P8B	115	115	0	G/G	99.0	688	chr17	7574012	7574013	G	snp	ts	0.00769230769231	64	1	0	1	0.950166157393	TP53	10	ENST00000269305	ttC/ttT	p.Phe338Phe/c.1014C>T	393	P53_tetramer	protein_coding	synonymous_variant	LOW	1	rs150293825	1	0.000348837209302	0.000230662771029	0	-1.0	-1.0	1	0.0002142	0.000220675606858	0.00032200686948	0	None	0	0	-0.32	2.46	0.706548	likely-benign	other
PS2.A8P8B	144	144	0	G/G	99.0	688	chr17	7574012	7574013	G	snp	ts	0.00769230769231	64	1	0	1	0.950166157393	TP53	10	ENST00000269305	ttC/ttT	p.Phe338Phe/c.1014C>T	393	P53_tetramer	protein_coding	synonymous_variant	LOW	1	rs150293825	1	0.000348837209302	0.000230662771029	0	-1.0	-1.0	1	0.0002142	0.000220675606858	0.00032200686948	0	None	0	0	-0.32	2.46	0.706548	likely-benign	other
SA23.ATU14	107	107	0	G/G	99.0	688	chr17	7574012	7574013	G	snp	ts	0.00769230769231	64	1	0	1	0.950166157393	TP53	10	ENST00000269305	ttC/ttT	p.Phe338Phe/c.1014C>T	393	P53_tetramer	protein_coding	synonymous_variant	LOW	1	rs150293825	1	0.000348837209302	0.000230662771029	0	-1.0	-1.0	1	0.0002142	0.000220675606858	0.00032200686948	0	None	0	0	-0.32	2.46	0.706548	likely-benign	other
SA33.ATU14	8	8	0	G/G	24.0	688	chr17	7574012	7574013	G	snp	ts	0.00769230769231	64	1	0	1	0.950166157393	TP53	10	ENST00000269305	ttC/ttT	p.Phe338Phe/c.1014C>T	393	P53_tetramer	protein_coding	synonymous_variant	LOW	1	rs150293825	1	0.000348837209302	0.000230662771029	0	-1.0	-1.0	1	0.0002142	0.000220675606858	0.00032200686948	0	None	0	0	-0.32	2.46	0.706548	likely-benign	other
SA36.A8P8B	47	47	0	G/G	99.0	688	chr17	7574012	7574013	G	snp	ts	0.00769230769231	64	1	0	1	0.950166157393	TP53	10	ENST00000269305	ttC/ttT	p.Phe338Phe/c.1014C>T	393	P53_tetramer	protein_coding	synonymous_variant	LOW	1	rs150293825	1	0.000348837209302	0.000230662771029	0	-1.0	-1.0	1	0.0002142	0.000220675606858	0.00032200686948	0	None	0	0	-0.32	2.46	0.706548	likely-benign	other
SA38.ATU14	40	40	0	G/G	99.0	688	chr17	7574012	7574013	G	snp	ts	0.00769230769231	64	1	0	1	0.950166157393	TP53	10	ENST00000269305	ttC/ttT	p.Phe338Phe/c.1014C>T	393	P53_tetramer	protein_coding	synonymous_variant	LOW	1	rs150293825	1	0.000348837209302	0.000230662771029	0	-1.0	-1.0	1	0.0002142	0.000220675606858	0.00032200686948	0	None	0	0	-0.32	2.46	0.706548	likely-benign	other
SA41.ATU14	166	165	1	G/G	99.0	688	chr17	7574012	7574013	G	snp	ts	0.00769230769231	64	1	0	1	0.950166157393	TP53	10	ENST00000269305	ttC/ttT	p.Phe338Phe/c.1014C>T	393	P53_tetramer	protein_coding	synonymous_variant	LOW	1	rs150293825	1	0.000348837209302	0.000230662771029	0	-1.0	-1.0	1	0.0002142	0.000220675606858	0.00032200686948	0	None	0	0	-0.32	2.46	0.706548	likely-benign	other
Y102.ATU14	27	27	0	G/G	78.0	688	chr17	7574012	7574013	G	snp	ts	0.00769230769231	64	1	0	1	0.950166157393	TP53	10	ENST00000269305	ttC/ttT	p.Phe338Phe/c.1014C>T	393	P53_tetramer	protein_coding	synonymous_variant	LOW	1	rs150293825	1	0.000348837209302	0.000230662771029	0	-1.0	-1.0	1	0.0002142	0.000220675606858	0.00032200686948	0	None	0	0	-0.32	2.46	0.706548	likely-benign	other
Y105.ATU14	42	42	0	G/G	99.0	688	chr17	7574012	7574013	G	snp	ts	0.00769230769231	64	1	0	1	0.950166157393	TP53	10	ENST00000269305	ttC/ttT	p.Phe338Phe/c.1014C>T	393	P53_tetramer	protein_coding	synonymous_variant	LOW	1	rs150293825	1	0.000348837209302	0.000230662771029	0	-1.0	-1.0	1	0.0002142	0.000220675606858	0.00032200686948	0	None	0	0	-0.32	2.46	0.706548	likely-benign	other
Y115B.ATU14	185	185	0	G/G	99.0	688	chr17	7574012	7574013	G	snp	ts	0.00769230769231	64	1	0	1	0.950166157393	TP53	10	ENST00000269305	ttC/ttT	p.Phe338Phe/c.1014C>T	393	P53_tetramer	protein_coding	synonymous_variant	LOW	1	rs150293825	1	0.000348837209302	0.000230662771029	0	-1.0	-1.0	1	0.0002142	0.000220675606858	0.00032200686948	0	None	0	0	-0.32	2.46	0.706548	likely-benign	other
Y123B.ATU14	275	275	0	G/G	99.0	688	chr17	7574012	7574013	G	snp	ts	0.00769230769231	64	1	0	1	0.950166157393	TP53	10	ENST00000269305	ttC/ttT	p.Phe338Phe/c.1014C>T	393	P53_tetramer	protein_coding	synonymous_variant	LOW	1	rs150293825	1	0.000348837209302	0.000230662771029	0	-1.0	-1.0	1	0.0002142	0.000220675606858	0.00032200686948	0	None	0	0	-0.32	2.46	0.706548	likely-benign	other
Y135.ATU14	279	279	0	G/G	99.0	688	chr17	7574012	7574013	G	snp	ts	0.00769230769231	64	1	0	1	0.950166157393	TP53	10	ENST00000269305	ttC/ttT	p.Phe338Phe/c.1014C>T	393	P53_tetramer	protein_coding	synonymous_variant	LOW	1	rs150293825	1	0.000348837209302	0.000230662771029	0	-1.0	-1.0	1	0.0002142	0.000220675606858	0.00032200686948	0	None	0	0	-0.32	2.46	0.706548	likely-benign	other
Y137B.ATU14	95	94	1	G/G	99.0	688	chr17	7574012	7574013	G	snp	ts	0.00769230769231	64	1	0	1	0.950166157393	TP53	10	ENST00000269305	ttC/ttT	p.Phe338Phe/c.1014C>T	393	P53_tetramer	protein_coding	synonymous_variant	LOW	1	rs150293825	1	0.000348837209302	0.000230662771029	0	-1.0	-1.0	1	0.0002142	0.000220675606858	0.00032200686948	0	None	0	0	-0.32	2.46	0.706548	likely-benign	other
Y145B.ATU14	438	438	0	G/G	99.0	688	chr17	7574012	7574013	G	snp	ts	0.00769230769231	64	1	0	1	0.950166157393	TP53	10	ENST00000269305	ttC/ttT	p.Phe338Phe/c.1014C>T	393	P53_tetramer	protein_coding	synonymous_variant	LOW	1	rs150293825	1	0.000348837209302	0.000230662771029	0	-1.0	-1.0	1	0.0002142	0.000220675606858	0.00032200686948	0	None	0	0	-0.32	2.46	0.706548	likely-benign	other
Y146B.A8P8B	46	46	0	G/G	99.0	688	chr17	7574012	7574013	G	snp	ts	0.00769230769231	64	1	0	1	0.950166157393	TP53	10	ENST00000269305	ttC/ttT	p.Phe338Phe/c.1014C>T	393	P53_tetramer	protein_coding	synonymous_variant	LOW	1	rs150293825	1	0.000348837209302	0.000230662771029	0	-1.0	-1.0	1	0.0002142	0.000220675606858	0.00032200686948	0	None	0	0	-0.32	2.46	0.706548	likely-benign	other
Y151B.ATU14	77	77	0	G/G	99.0	688	chr17	7574012	7574013	G	snp	ts	0.00769230769231	64	1	0	1	0.950166157393	TP53	10	ENST00000269305	ttC/ttT	p.Phe338Phe/c.1014C>T	393	P53_tetramer	protein_coding	synonymous_variant	LOW	1	rs150293825	1	0.000348837209302	0.000230662771029	0	-1.0	-1.0	1	0.0002142	0.000220675606858	0.00032200686948	0	None	0	0	-0.32	2.46	0.706548	likely-benign	other
Y159C.ATU14	83	83	0	G/G	99.0	688	chr17	7574012	7574013	G	snp	ts	0.00769230769231	64	1	0	1	0.950166157393	TP53	10	ENST00000269305	ttC/ttT	p.Phe338Phe/c.1014C>T	393	P53_tetramer	protein_coding	synonymous_variant	LOW	1	rs150293825	1	0.000348837209302	0.000230662771029	0	-1.0	-1.0	1	0.0002142	0.000220675606858	0.00032200686948	0	None	0	0	-0.32	2.46	0.706548	likely-benign	other
Y161C.ATU14	38	38	0	G/G	99.0	688	chr17	7574012	7574013	G	snp	ts	0.00769230769231	64	1	0	1	0.950166157393	TP53	10	ENST00000269305	ttC/ttT	p.Phe338Phe/c.1014C>T	393	P53_tetramer	protein_coding	synonymous_variant	LOW	1	rs150293825	1	0.000348837209302	0.000230662771029	0	-1.0	-1.0	1	0.0002142	0.000220675606858	0.00032200686948	0	None	0	0	-0.32	2.46	0.706548	likely-benign	other
Y165B.ATU14	158	158	0	G/G	99.0	688	chr17	7574012	7574013	G	snp	ts	0.00769230769231	64	1	0	1	0.950166157393	TP53	10	ENST00000269305	ttC/ttT	p.Phe338Phe/c.1014C>T	393	P53_tetramer	protein_coding	synonymous_variant	LOW	1	rs150293825	1	0.000348837209302	0.000230662771029	0	-1.0	-1.0	1	0.0002142	0.000220675606858	0.00032200686948	0	None	0	0	-0.32	2.46	0.706548	likely-benign	other
Y167B.A8P8B	76	76	0	G/G	99.0	688	chr17	7574012	7574013	G	snp	ts	0.00769230769231	64	1	0	1	0.950166157393	TP53	10	ENST00000269305	ttC/ttT	p.Phe338Phe/c.1014C>T	393	P53_tetramer	protein_coding	synonymous_variant	LOW	1	rs150293825	1	0.000348837209302	0.000230662771029	0	-1.0	-1.0	1	0.0002142	0.000220675606858	0.00032200686948	0	None	0	0	-0.32	2.46	0.706548	likely-benign	other
Y168C.A8P8B	20	20	0	G/G	60.0	688	chr17	7574012	7574013	G	snp	ts	0.00769230769231	64	1	0	1	0.950166157393	TP53	10	ENST00000269305	ttC/ttT	p.Phe338Phe/c.1014C>T	393	P53_tetramer	protein_coding	synonymous_variant	LOW	1	rs150293825	1	0.000348837209302	0.000230662771029	0	-1.0	-1.0	1	0.0002142	0.000220675606858	0.00032200686948	0	None	0	0	-0.32	2.46	0.706548	likely-benign	other
Y169C.ATU14	70	70	0	G/G	99.0	688	chr17	7574012	7574013	G	snp	ts	0.00769230769231	64	1	0	1	0.950166157393	TP53	10	ENST00000269305	ttC/ttT	p.Phe338Phe/c.1014C>T	393	P53_tetramer	protein_coding	synonymous_variant	LOW	1	rs150293825	1	0.000348837209302	0.000230662771029	0	-1.0	-1.0	1	0.0002142	0.000220675606858	0.00032200686948	0	None	0	0	-0.32	2.46	0.706548	likely-benign	other
ps4.AL9E5	159	159	0	G/G	99.0	688	chr17	7574012	7574013	G	snp	ts	0.00769230769231	64	1	0	1	0.950166157393	TP53	10	ENST00000269305	ttC/ttT	p.Phe338Phe/c.1014C>T	393	P53_tetramer	protein_coding	synonymous_variant	LOW	1	rs150293825	1	0.000348837209302	0.000230662771029	0	-1.0	-1.0	1	0.0002142	0.000220675606858	0.00032200686948	0	None	0	0	-0.32	2.46	0.706548	likely-benign	other
ps6.AUMV1	55	55	0	G/G	99.0	688	chr17	7574012	7574013	G	snp	ts	0.00769230769231	64	1	0	1	0.950166157393	TP53	10	ENST00000269305	ttC/ttT	p.Phe338Phe/c.1014C>T	393	P53_tetramer	protein_coding	synonymous_variant	LOW	1	rs150293825	1	0.000348837209302	0.000230662771029	0	-1.0	-1.0	1	0.0002142	0.000220675606858	0.00032200686948	0	None	0	0	-0.32	2.46	0.706548	likely-benign	other
sa14.AL9E5	207	207	0	G/G	99.0	688	chr17	7574012	7574013	G	snp	ts	0.00769230769231	64	1	0	1	0.950166157393	TP53	10	ENST00000269305	ttC/ttT	p.Phe338Phe/c.1014C>T	393	P53_tetramer	protein_coding	synonymous_variant	LOW	1	rs150293825	1	0.000348837209302	0.000230662771029	0	-1.0	-1.0	1	0.0002142	0.000220675606858	0.00032200686948	0	None	0	0	-0.32	2.46	0.706548	likely-benign	other
sa39.AL9E5	35	35	0	G/G	99.0	688	chr17	7574012	7574013	G	snp	ts	0.00769230769231	64	1	0	1	0.950166157393	TP53	10	ENST00000269305	ttC/ttT	p.Phe338Phe/c.1014C>T	393	P53_tetramer	protein_coding	synonymous_variant	LOW	1	rs150293825	1	0.000348837209302	0.000230662771029	0	-1.0	-1.0	1	0.0002142	0.000220675606858	0.00032200686948	0	None	0	0	-0.32	2.46	0.706548	likely-benign	other
sa40.ATR2U	120	120	0	G/G	99.0	688	chr17	7574012	7574013	G	snp	ts	0.00769230769231	64	1	0	1	0.950166157393	TP53	10	ENST00000269305	ttC/ttT	p.Phe338Phe/c.1014C>T	393	P53_tetramer	protein_coding	synonymous_variant	LOW	1	rs150293825	1	0.000348837209302	0.000230662771029	0	-1.0	-1.0	1	0.0002142	0.000220675606858	0.00032200686948	0	None	0	0	-0.32	2.46	0.706548	likely-benign	other
y103.AUMV1	227	225	2	G/G	99.0	688	chr17	7574012	7574013	G	snp	ts	0.00769230769231	64	1	0	1	0.950166157393	TP53	10	ENST00000269305	ttC/ttT	p.Phe338Phe/c.1014C>T	393	P53_tetramer	protein_coding	synonymous_variant	LOW	1	rs150293825	1	0.000348837209302	0.000230662771029	0	-1.0	-1.0	1	0.0002142	0.000220675606858	0.00032200686948	0	None	0	0	-0.32	2.46	0.706548	likely-benign	other
y104.ATR2U	44	44	0	G/G	99.0	688	chr17	7574012	7574013	G	snp	ts	0.00769230769231	64	1	0	1	0.950166157393	TP53	10	ENST00000269305	ttC/ttT	p.Phe338Phe/c.1014C>T	393	P53_tetramer	protein_coding	synonymous_variant	LOW	1	rs150293825	1	0.000348837209302	0.000230662771029	0	-1.0	-1.0	1	0.0002142	0.000220675606858	0.00032200686948	0	None	0	0	-0.32	2.46	0.706548	likely-benign	other
y109b.AUMV1	39	39	0	G/G	99.0	688	chr17	7574012	7574013	G	snp	ts	0.00769230769231	64	1	0	1	0.950166157393	TP53	10	ENST00000269305	ttC/ttT	p.Phe338Phe/c.1014C>T	393	P53_tetramer	protein_coding	synonymous_variant	LOW	1	rs150293825	1	0.000348837209302	0.000230662771029	0	-1.0	-1.0	1	0.0002142	0.000220675606858	0.00032200686948	0	None	0	0	-0.32	2.46	0.706548	likely-benign	other
y110b.AUMV1	28	28	0	G/G	84.0	688	chr17	7574012	7574013	G	snp	ts	0.00769230769231	64	1	0	1	0.950166157393	TP53	10	ENST00000269305	ttC/ttT	p.Phe338Phe/c.1014C>T	393	P53_tetramer	protein_coding	synonymous_variant	LOW	1	rs150293825	1	0.000348837209302	0.000230662771029	0	-1.0	-1.0	1	0.0002142	0.000220675606858	0.00032200686948	0	None	0	0	-0.32	2.46	0.706548	likely-benign	other
y128b.AUMV1	175	173	2	G/G	99.0	688	chr17	7574012	7574013	G	snp	ts	0.00769230769231	64	1	0	1	0.950166157393	TP53	10	ENST00000269305	ttC/ttT	p.Phe338Phe/c.1014C>T	393	P53_tetramer	protein_coding	synonymous_variant	LOW	1	rs150293825	1	0.000348837209302	0.000230662771029	0	-1.0	-1.0	1	0.0002142	0.000220675606858	0.00032200686948	0	None	0	0	-0.32	2.46	0.706548	likely-benign	other
y132b.AUMV1	53	53	0	G/G	99.0	688	chr17	7574012	7574013	G	snp	ts	0.00769230769231	64	1	0	1	0.950166157393	TP53	10	ENST00000269305	ttC/ttT	p.Phe338Phe/c.1014C>T	393	P53_tetramer	protein_coding	synonymous_variant	LOW	1	rs150293825	1	0.000348837209302	0.000230662771029	0	-1.0	-1.0	1	0.0002142	0.000220675606858	0.00032200686948	0	None	0	0	-0.32	2.46	0.706548	likely-benign	other
y134b.AL9E5	201	201	0	G/G	99.0	688	chr17	7574012	7574013	G	snp	ts	0.00769230769231	64	1	0	1	0.950166157393	TP53	10	ENST00000269305	ttC/ttT	p.Phe338Phe/c.1014C>T	393	P53_tetramer	protein_coding	synonymous_variant	LOW	1	rs150293825	1	0.000348837209302	0.000230662771029	0	-1.0	-1.0	1	0.0002142	0.000220675606858	0.00032200686948	0	None	0	0	-0.32	2.46	0.706548	likely-benign	other
y144c.AUMV1	101	101	0	G/G	99.0	688	chr17	7574012	7574013	G	snp	ts	0.00769230769231	64	1	0	1	0.950166157393	TP53	10	ENST00000269305	ttC/ttT	p.Phe338Phe/c.1014C>T	393	P53_tetramer	protein_coding	synonymous_variant	LOW	1	rs150293825	1	0.000348837209302	0.000230662771029	0	-1.0	-1.0	1	0.0002142	0.000220675606858	0.00032200686948	0	None	0	0	-0.32	2.46	0.706548	likely-benign	other
y147c.AUMV1	274	274	0	G/G	99.0	688	chr17	7574012	7574013	G	snp	ts	0.00769230769231	64	1	0	1	0.950166157393	TP53	10	ENST00000269305	ttC/ttT	p.Phe338Phe/c.1014C>T	393	P53_tetramer	protein_coding	synonymous_variant	LOW	1	rs150293825	1	0.000348837209302	0.000230662771029	0	-1.0	-1.0	1	0.0002142	0.000220675606858	0.00032200686948	0	None	0	0	-0.32	2.46	0.706548	likely-benign	other
y162c.ATR2U	50	50	0	G/G	99.0	688	chr17	7574012	7574013	G	snp	ts	0.00769230769231	64	1	0	1	0.950166157393	TP53	10	ENST00000269305	ttC/ttT	p.Phe338Phe/c.1014C>T	393	P53_tetramer	protein_coding	synonymous_variant	LOW	1	rs150293825	1	0.000348837209302	0.000230662771029	0	-1.0	-1.0	1	0.0002142	0.000220675606858	0.00032200686948	0	None	0	0	-0.32	2.46	0.706548	likely-benign	other
y179f.AL9E5	186	186	0	G/G	99.0	688	chr17	7574012	7574013	G	snp	ts	0.00769230769231	64	1	0	1	0.950166157393	TP53	10	ENST00000269305	ttC/ttT	p.Phe338Phe/c.1014C>T	393	P53_tetramer	protein_coding	synonymous_variant	LOW	1	rs150293825	1	0.000348837209302	0.000230662771029	0	-1.0	-1.0	1	0.0002142	0.000220675606858	0.00032200686948	0	None	0	0	-0.32	2.46	0.706548	likely-benign	other
y183b.AUMV1	105	105	0	G/G	99.0	688	chr17	7574012	7574013	G	snp	ts	0.00769230769231	64	1	0	1	0.950166157393	TP53	10	ENST00000269305	ttC/ttT	p.Phe338Phe/c.1014C>T	393	P53_tetramer	protein_coding	synonymous_variant	LOW	1	rs150293825	1	0.000348837209302	0.000230662771029	0	-1.0	-1.0	1	0.0002142	0.000220675606858	0.00032200686948	0	None	0	0	-0.32	2.46	0.706548	likely-benign	other
y188b.AUMV1	77	77	0	G/G	99.0	688	chr17	7574012	7574013	G	snp	ts	0.00769230769231	64	1	0	1	0.950166157393	TP53	10	ENST00000269305	ttC/ttT	p.Phe338Phe/c.1014C>T	393	P53_tetramer	protein_coding	synonymous_variant	LOW	1	rs150293825	1	0.000348837209302	0.000230662771029	0	-1.0	-1.0	1	0.0002142	0.000220675606858	0.00032200686948	0	None	0	0	-0.32	2.46	0.706548	likely-benign	other
y199b.AL9E5	122	122	0	G/G	99.0	688	chr17	7574012	7574013	G	snp	ts	0.00769230769231	64	1	0	1	0.950166157393	TP53	10	ENST00000269305	ttC/ttT	p.Phe338Phe/c.1014C>T	393	P53_tetramer	protein_coding	synonymous_variant	LOW	1	rs150293825	1	0.000348837209302	0.000230662771029	0	-1.0	-1.0	1	0.0002142	0.000220675606858	0.00032200686948	0	None	0	0	-0.32	2.46	0.706548	likely-benign	other
y3.AUMV1	64	64	0	G/G	99.0	688	chr17	7574012	7574013	G	snp	ts	0.00769230769231	64	1	0	1	0.950166157393	TP53	10	ENST00000269305	ttC/ttT	p.Phe338Phe/c.1014C>T	393	P53_tetramer	protein_coding	synonymous_variant	LOW	1	rs150293825	1	0.000348837209302	0.000230662771029	0	-1.0	-1.0	1	0.0002142	0.000220675606858	0.00032200686948	0	None	0	0	-0.32	2.46	0.706548	likely-benign	other
y68.ATR2U	193	190	3	G/G	99.0	688	chr17	7574012	7574013	G	snp	ts	0.00769230769231	64	1	0	1	0.950166157393	TP53	10	ENST00000269305	ttC/ttT	p.Phe338Phe/c.1014C>T	393	P53_tetramer	protein_coding	synonymous_variant	LOW	1	rs150293825	1	0.000348837209302	0.000230662771029	0	-1.0	-1.0	1	0.0002142	0.000220675606858	0.00032200686948	0	None	0	0	-0.32	2.46	0.706548	likely-benign	other
y77.AL9E5	157	157	0	G/G	99.0	688	chr17	7574012	7574013	G	snp	ts	0.00769230769231	64	1	0	1	0.950166157393	TP53	10	ENST00000269305	ttC/ttT	p.Phe338Phe/c.1014C>T	393	P53_tetramer	protein_coding	synonymous_variant	LOW	1	rs150293825	1	0.000348837209302	0.000230662771029	0	-1.0	-1.0	1	0.0002142	0.000220675606858	0.00032200686948	0	None	0	0	-0.32	2.46	0.706548	likely-benign	other
y88.AUMV1	22	22	0	G/G	63.0	688	chr17	7574012	7574013	G	snp	ts	0.00769230769231	64	1	0	1	0.950166157393	TP53	10	ENST00000269305	ttC/ttT	p.Phe338Phe/c.1014C>T	393	P53_tetramer	protein_coding	synonymous_variant	LOW	1	rs150293825	1	0.000348837209302	0.000230662771029	0	-1.0	-1.0	1	0.0002142	0.000220675606858	0.00032200686948	0	None	0	0	-0.32	2.46	0.706548	likely-benign	other
Y143C.ATU14	60	29	31	G/A	99.0	688	chr17	7574012	7574013	G	snp	ts	0.00769230769231	64	1	0	1	0.950166157393	TP53	10	ENST00000269305	ttC/ttT	p.Phe338Phe/c.1014C>T	393	P53_tetramer	protein_coding	synonymous_variant	LOW	1	rs150293825	1	0.000348837209302	0.000230662771029	0	-1.0	-1.0	1	0.0002142	0.000220675606858	0.00032200686948	0	None	0	0	-0.32	2.46	0.706548	likely-benign	other
1.ATR2U	122	122	0	CTG/CTG	99.0	689	chr17	7577084	7577087	CTG	indel	del	0.00757575757576	65	1	0	0	0.950550440504	TP53	8	ENST00000269305	aca/	p.Thr284fs/c.851_852delCA	393	P53	protein_coding	frameshift_variant	HIGH	0	None	0	-1.0	-1.0	0	-1.0	-1.0	0	-1.0	-1.0	-1.0	0	None	0	0	None	None	0.722319	None	None
10.ATU14	35	35	0	CTG/CTG	87.0	689	chr17	7577084	7577087	CTG	indel	del	0.00757575757576	65	1	0	0	0.950550440504	TP53	8	ENST00000269305	aca/	p.Thr284fs/c.851_852delCA	393	P53	protein_coding	frameshift_variant	HIGH	0	None	0	-1.0	-1.0	0	-1.0	-1.0	0	-1.0	-1.0	-1.0	0	None	0	0	None	None	0.722319	None	None
17.AUMV1	113	113	0	CTG/CTG	99.0	689	chr17	7577084	7577087	CTG	indel	del	0.00757575757576	65	1	0	0	0.950550440504	TP53	8	ENST00000269305	aca/	p.Thr284fs/c.851_852delCA	393	P53	protein_coding	frameshift_variant	HIGH	0	None	0	-1.0	-1.0	0	-1.0	-1.0	0	-1.0	-1.0	-1.0	0	None	0	0	None	None	0.722319	None	None
2.ATR2U	213	212	1	CTG/CTG	99.0	689	chr17	7577084	7577087	CTG	indel	del	0.00757575757576	65	1	0	0	0.950550440504	TP53	8	ENST00000269305	aca/	p.Thr284fs/c.851_852delCA	393	P53	protein_coding	frameshift_variant	HIGH	0	None	0	-1.0	-1.0	0	-1.0	-1.0	0	-1.0	-1.0	-1.0	0	None	0	0	None	None	0.722319	None	None
21.AL9E5	22	22	0	CTG/CTG	51.0	689	chr17	7577084	7577087	CTG	indel	del	0.00757575757576	65	1	0	0	0.950550440504	TP53	8	ENST00000269305	aca/	p.Thr284fs/c.851_852delCA	393	P53	protein_coding	frameshift_variant	HIGH	0	None	0	-1.0	-1.0	0	-1.0	-1.0	0	-1.0	-1.0	-1.0	0	None	0	0	None	None	0.722319	None	None
26.ATU14	87	87	0	CTG/CTG	99.0	689	chr17	7577084	7577087	CTG	indel	del	0.00757575757576	65	1	0	0	0.950550440504	TP53	8	ENST00000269305	aca/	p.Thr284fs/c.851_852delCA	393	P53	protein_coding	frameshift_variant	HIGH	0	None	0	-1.0	-1.0	0	-1.0	-1.0	0	-1.0	-1.0	-1.0	0	None	0	0	None	None	0.722319	None	None
31.ATU14	135	135	0	CTG/CTG	99.0	689	chr17	7577084	7577087	CTG	indel	del	0.00757575757576	65	1	0	0	0.950550440504	TP53	8	ENST00000269305	aca/	p.Thr284fs/c.851_852delCA	393	P53	protein_coding	frameshift_variant	HIGH	0	None	0	-1.0	-1.0	0	-1.0	-1.0	0	-1.0	-1.0	-1.0	0	None	0	0	None	None	0.722319	None	None
35.ATU14	28	28	0	CTG/CTG	72.0	689	chr17	7577084	7577087	CTG	indel	del	0.00757575757576	65	1	0	0	0.950550440504	TP53	8	ENST00000269305	aca/	p.Thr284fs/c.851_852delCA	393	P53	protein_coding	frameshift_variant	HIGH	0	None	0	-1.0	-1.0	0	-1.0	-1.0	0	-1.0	-1.0	-1.0	0	None	0	0	None	None	0.722319	None	None
37.ATU14	55	55	0	CTG/CTG	99.0	689	chr17	7577084	7577087	CTG	indel	del	0.00757575757576	65	1	0	0	0.950550440504	TP53	8	ENST00000269305	aca/	p.Thr284fs/c.851_852delCA	393	P53	protein_coding	frameshift_variant	HIGH	0	None	0	-1.0	-1.0	0	-1.0	-1.0	0	-1.0	-1.0	-1.0	0	None	0	0	None	None	0.722319	None	None
45.ATU14	44	44	0	CTG/CTG	99.0	689	chr17	7577084	7577087	CTG	indel	del	0.00757575757576	65	1	0	0	0.950550440504	TP53	8	ENST00000269305	aca/	p.Thr284fs/c.851_852delCA	393	P53	protein_coding	frameshift_variant	HIGH	0	None	0	-1.0	-1.0	0	-1.0	-1.0	0	-1.0	-1.0	-1.0	0	None	0	0	None	None	0.722319	None	None
5.ATR2U	132	132	0	CTG/CTG	99.0	689	chr17	7577084	7577087	CTG	indel	del	0.00757575757576	65	1	0	0	0.950550440504	TP53	8	ENST00000269305	aca/	p.Thr284fs/c.851_852delCA	393	P53	protein_coding	frameshift_variant	HIGH	0	None	0	-1.0	-1.0	0	-1.0	-1.0	0	-1.0	-1.0	-1.0	0	None	0	0	None	None	0.722319	None	None
63n.AUMV1	54	54	0	CTG/CTG	99.0	689	chr17	7577084	7577087	CTG	indel	del	0.00757575757576	65	1	0	0	0.950550440504	TP53	8	ENST00000269305	aca/	p.Thr284fs/c.851_852delCA	393	P53	protein_coding	frameshift_variant	HIGH	0	None	0	-1.0	-1.0	0	-1.0	-1.0	0	-1.0	-1.0	-1.0	0	None	0	0	None	None	0.722319	None	None
7.A8P8B	110	109	1	CTG/CTG	99.0	689	chr17	7577084	7577087	CTG	indel	del	0.00757575757576	65	1	0	0	0.950550440504	TP53	8	ENST00000269305	aca/	p.Thr284fs/c.851_852delCA	393	P53	protein_coding	frameshift_variant	HIGH	0	None	0	-1.0	-1.0	0	-1.0	-1.0	0	-1.0	-1.0	-1.0	0	None	0	0	None	None	0.722319	None	None
72.ATR2U	150	150	0	CTG/CTG	99.0	689	chr17	7577084	7577087	CTG	indel	del	0.00757575757576	65	1	0	0	0.950550440504	TP53	8	ENST00000269305	aca/	p.Thr284fs/c.851_852delCA	393	P53	protein_coding	frameshift_variant	HIGH	0	None	0	-1.0	-1.0	0	-1.0	-1.0	0	-1.0	-1.0	-1.0	0	None	0	0	None	None	0.722319	None	None
82.ATR2U	96	96	0	CTG/CTG	99.0	689	chr17	7577084	7577087	CTG	indel	del	0.00757575757576	65	1	0	0	0.950550440504	TP53	8	ENST00000269305	aca/	p.Thr284fs/c.851_852delCA	393	P53	protein_coding	frameshift_variant	HIGH	0	None	0	-1.0	-1.0	0	-1.0	-1.0	0	-1.0	-1.0	-1.0	0	None	0	0	None	None	0.722319	None	None
84.ATR2U	116	116	0	CTG/CTG	99.0	689	chr17	7577084	7577087	CTG	indel	del	0.00757575757576	65	1	0	0	0.950550440504	TP53	8	ENST00000269305	aca/	p.Thr284fs/c.851_852delCA	393	P53	protein_coding	frameshift_variant	HIGH	0	None	0	-1.0	-1.0	0	-1.0	-1.0	0	-1.0	-1.0	-1.0	0	None	0	0	None	None	0.722319	None	None
91n.AUMV1	43	43	0	CTG/CTG	99.0	689	chr17	7577084	7577087	CTG	indel	del	0.00757575757576	65	1	0	0	0.950550440504	TP53	8	ENST00000269305	aca/	p.Thr284fs/c.851_852delCA	393	P53	protein_coding	frameshift_variant	HIGH	0	None	0	-1.0	-1.0	0	-1.0	-1.0	0	-1.0	-1.0	-1.0	0	None	0	0	None	None	0.722319	None	None
BS2.ATU14	23	23	0	CTG/CTG	69.0	689	chr17	7577084	7577087	CTG	indel	del	0.00757575757576	65	1	0	0	0.950550440504	TP53	8	ENST00000269305	aca/	p.Thr284fs/c.851_852delCA	393	P53	protein_coding	frameshift_variant	HIGH	0	None	0	-1.0	-1.0	0	-1.0	-1.0	0	-1.0	-1.0	-1.0	0	None	0	0	None	None	0.722319	None	None
PS1.A8P8B	66	66	0	CTG/CTG	99.0	689	chr17	7577084	7577087	CTG	indel	del	0.00757575757576	65	1	0	0	0.950550440504	TP53	8	ENST00000269305	aca/	p.Thr284fs/c.851_852delCA	393	P53	protein_coding	frameshift_variant	HIGH	0	None	0	-1.0	-1.0	0	-1.0	-1.0	0	-1.0	-1.0	-1.0	0	None	0	0	None	None	0.722319	None	None
PS2.A8P8B	43	43	0	CTG/CTG	99.0	689	chr17	7577084	7577087	CTG	indel	del	0.00757575757576	65	1	0	0	0.950550440504	TP53	8	ENST00000269305	aca/	p.Thr284fs/c.851_852delCA	393	P53	protein_coding	frameshift_variant	HIGH	0	None	0	-1.0	-1.0	0	-1.0	-1.0	0	-1.0	-1.0	-1.0	0	None	0	0	None	None	0.722319	None	None
SA23.ATU14	78	78	0	CTG/CTG	99.0	689	chr17	7577084	7577087	CTG	indel	del	0.00757575757576	65	1	0	0	0.950550440504	TP53	8	ENST00000269305	aca/	p.Thr284fs/c.851_852delCA	393	P53	protein_coding	frameshift_variant	HIGH	0	None	0	-1.0	-1.0	0	-1.0	-1.0	0	-1.0	-1.0	-1.0	0	None	0	0	None	None	0.722319	None	None
SA36.A8P8B	12	12	0	CTG/CTG	36.0	689	chr17	7577084	7577087	CTG	indel	del	0.00757575757576	65	1	0	0	0.950550440504	TP53	8	ENST00000269305	aca/	p.Thr284fs/c.851_852delCA	393	P53	protein_coding	frameshift_variant	HIGH	0	None	0	-1.0	-1.0	0	-1.0	-1.0	0	-1.0	-1.0	-1.0	0	None	0	0	None	None	0.722319	None	None
SA38.ATU14	15	15	0	CTG/CTG	39.0	689	chr17	7577084	7577087	CTG	indel	del	0.00757575757576	65	1	0	0	0.950550440504	TP53	8	ENST00000269305	aca/	p.Thr284fs/c.851_852delCA	393	P53	protein_coding	frameshift_variant	HIGH	0	None	0	-1.0	-1.0	0	-1.0	-1.0	0	-1.0	-1.0	-1.0	0	None	0	0	None	None	0.722319	None	None
SA41.ATU14	117	117	0	CTG/CTG	99.0	689	chr17	7577084	7577087	CTG	indel	del	0.00757575757576	65	1	0	0	0.950550440504	TP53	8	ENST00000269305	aca/	p.Thr284fs/c.851_852delCA	393	P53	protein_coding	frameshift_variant	HIGH	0	None	0	-1.0	-1.0	0	-1.0	-1.0	0	-1.0	-1.0	-1.0	0	None	0	0	None	None	0.722319	None	None
Y102.ATU14	15	15	0	CTG/CTG	39.0	689	chr17	7577084	7577087	CTG	indel	del	0.00757575757576	65	1	0	0	0.950550440504	TP53	8	ENST00000269305	aca/	p.Thr284fs/c.851_852delCA	393	P53	protein_coding	frameshift_variant	HIGH	0	None	0	-1.0	-1.0	0	-1.0	-1.0	0	-1.0	-1.0	-1.0	0	None	0	0	None	None	0.722319	None	None
Y105.ATU14	23	23	0	CTG/CTG	66.0	689	chr17	7577084	7577087	CTG	indel	del	0.00757575757576	65	1	0	0	0.950550440504	TP53	8	ENST00000269305	aca/	p.Thr284fs/c.851_852delCA	393	P53	protein_coding	frameshift_variant	HIGH	0	None	0	-1.0	-1.0	0	-1.0	-1.0	0	-1.0	-1.0	-1.0	0	None	0	0	None	None	0.722319	None	None
Y115B.ATU14	103	103	0	CTG/CTG	99.0	689	chr17	7577084	7577087	CTG	indel	del	0.00757575757576	65	1	0	0	0.950550440504	TP53	8	ENST00000269305	aca/	p.Thr284fs/c.851_852delCA	393	P53	protein_coding	frameshift_variant	HIGH	0	None	0	-1.0	-1.0	0	-1.0	-1.0	0	-1.0	-1.0	-1.0	0	None	0	0	None	None	0.722319	None	None
Y123B.ATU14	154	154	0	CTG/CTG	99.0	689	chr17	7577084	7577087	CTG	indel	del	0.00757575757576	65	1	0	0	0.950550440504	TP53	8	ENST00000269305	aca/	p.Thr284fs/c.851_852delCA	393	P53	protein_coding	frameshift_variant	HIGH	0	None	0	-1.0	-1.0	0	-1.0	-1.0	0	-1.0	-1.0	-1.0	0	None	0	0	None	None	0.722319	None	None
Y135.ATU14	235	235	0	CTG/CTG	99.0	689	chr17	7577084	7577087	CTG	indel	del	0.00757575757576	65	1	0	0	0.950550440504	TP53	8	ENST00000269305	aca/	p.Thr284fs/c.851_852delCA	393	P53	protein_coding	frameshift_variant	HIGH	0	None	0	-1.0	-1.0	0	-1.0	-1.0	0	-1.0	-1.0	-1.0	0	None	0	0	None	None	0.722319	None	None
Y137B.ATU14	65	65	0	CTG/CTG	99.0	689	chr17	7577084	7577087	CTG	indel	del	0.00757575757576	65	1	0	0	0.950550440504	TP53	8	ENST00000269305	aca/	p.Thr284fs/c.851_852delCA	393	P53	protein_coding	frameshift_variant	HIGH	0	None	0	-1.0	-1.0	0	-1.0	-1.0	0	-1.0	-1.0	-1.0	0	None	0	0	None	None	0.722319	None	None
Y143C.ATU14	55	55	0	CTG/CTG	99.0	689	chr17	7577084	7577087	CTG	indel	del	0.00757575757576	65	1	0	0	0.950550440504	TP53	8	ENST00000269305	aca/	p.Thr284fs/c.851_852delCA	393	P53	protein_coding	frameshift_variant	HIGH	0	None	0	-1.0	-1.0	0	-1.0	-1.0	0	-1.0	-1.0	-1.0	0	None	0	0	None	None	0.722319	None	None
Y145B.ATU14	273	272	1	CTG/CTG	99.0	689	chr17	7577084	7577087	CTG	indel	del	0.00757575757576	65	1	0	0	0.950550440504	TP53	8	ENST00000269305	aca/	p.Thr284fs/c.851_852delCA	393	P53	protein_coding	frameshift_variant	HIGH	0	None	0	-1.0	-1.0	0	-1.0	-1.0	0	-1.0	-1.0	-1.0	0	None	0	0	None	None	0.722319	None	None
Y146B.A8P8B	15	15	0	CTG/CTG	36.0	689	chr17	7577084	7577087	CTG	indel	del	0.00757575757576	65	1	0	0	0.950550440504	TP53	8	ENST00000269305	aca/	p.Thr284fs/c.851_852delCA	393	P53	protein_coding	frameshift_variant	HIGH	0	None	0	-1.0	-1.0	0	-1.0	-1.0	0	-1.0	-1.0	-1.0	0	None	0	0	None	None	0.722319	None	None
Y151B.ATU14	50	50	0	CTG/CTG	99.0	689	chr17	7577084	7577087	CTG	indel	del	0.00757575757576	65	1	0	0	0.950550440504	TP53	8	ENST00000269305	aca/	p.Thr284fs/c.851_852delCA	393	P53	protein_coding	frameshift_variant	HIGH	0	None	0	-1.0	-1.0	0	-1.0	-1.0	0	-1.0	-1.0	-1.0	0	None	0	0	None	None	0.722319	None	None
Y159C.ATU14	38	37	1	CTG/CTG	81.0	689	chr17	7577084	7577087	CTG	indel	del	0.00757575757576	65	1	0	0	0.950550440504	TP53	8	ENST00000269305	aca/	p.Thr284fs/c.851_852delCA	393	P53	protein_coding	frameshift_variant	HIGH	0	None	0	-1.0	-1.0	0	-1.0	-1.0	0	-1.0	-1.0	-1.0	0	None	0	0	None	None	0.722319	None	None
Y161C.ATU14	14	14	0	CTG/CTG	36.0	689	chr17	7577084	7577087	CTG	indel	del	0.00757575757576	65	1	0	0	0.950550440504	TP53	8	ENST00000269305	aca/	p.Thr284fs/c.851_852delCA	393	P53	protein_coding	frameshift_variant	HIGH	0	None	0	-1.0	-1.0	0	-1.0	-1.0	0	-1.0	-1.0	-1.0	0	None	0	0	None	None	0.722319	None	None
Y165B.ATU14	101	101	0	CTG/CTG	99.0	689	chr17	7577084	7577087	CTG	indel	del	0.00757575757576	65	1	0	0	0.950550440504	TP53	8	ENST00000269305	aca/	p.Thr284fs/c.851_852delCA	393	P53	protein_coding	frameshift_variant	HIGH	0	None	0	-1.0	-1.0	0	-1.0	-1.0	0	-1.0	-1.0	-1.0	0	None	0	0	None	None	0.722319	None	None
Y167B.A8P8B	32	32	0	CTG/CTG	90.0	689	chr17	7577084	7577087	CTG	indel	del	0.00757575757576	65	1	0	0	0.950550440504	TP53	8	ENST00000269305	aca/	p.Thr284fs/c.851_852delCA	393	P53	protein_coding	frameshift_variant	HIGH	0	None	0	-1.0	-1.0	0	-1.0	-1.0	0	-1.0	-1.0	-1.0	0	None	0	0	None	None	0.722319	None	None
Y169C.ATU14	52	52	0	CTG/CTG	99.0	689	chr17	7577084	7577087	CTG	indel	del	0.00757575757576	65	1	0	0	0.950550440504	TP53	8	ENST00000269305	aca/	p.Thr284fs/c.851_852delCA	393	P53	protein_coding	frameshift_variant	HIGH	0	None	0	-1.0	-1.0	0	-1.0	-1.0	0	-1.0	-1.0	-1.0	0	None	0	0	None	None	0.722319	None	None
ps4.AL9E5	100	100	0	CTG/CTG	99.0	689	chr17	7577084	7577087	CTG	indel	del	0.00757575757576	65	1	0	0	0.950550440504	TP53	8	ENST00000269305	aca/	p.Thr284fs/c.851_852delCA	393	P53	protein_coding	frameshift_variant	HIGH	0	None	0	-1.0	-1.0	0	-1.0	-1.0	0	-1.0	-1.0	-1.0	0	None	0	0	None	None	0.722319	None	None
ps6.AUMV1	34	33	1	CTG/CTG	83.0	689	chr17	7577084	7577087	CTG	indel	del	0.00757575757576	65	1	0	0	0.950550440504	TP53	8	ENST00000269305	aca/	p.Thr284fs/c.851_852delCA	393	P53	protein_coding	frameshift_variant	HIGH	0	None	0	-1.0	-1.0	0	-1.0	-1.0	0	-1.0	-1.0	-1.0	0	None	0	0	None	None	0.722319	None	None
sa14.AL9E5	118	118	0	CTG/CTG	99.0	689	chr17	7577084	7577087	CTG	indel	del	0.00757575757576	65	1	0	0	0.950550440504	TP53	8	ENST00000269305	aca/	p.Thr284fs/c.851_852delCA	393	P53	protein_coding	frameshift_variant	HIGH	0	None	0	-1.0	-1.0	0	-1.0	-1.0	0	-1.0	-1.0	-1.0	0	None	0	0	None	None	0.722319	None	None
sa39.AL9E5	25	25	0	CTG/CTG	66.0	689	chr17	7577084	7577087	CTG	indel	del	0.00757575757576	65	1	0	0	0.950550440504	TP53	8	ENST00000269305	aca/	p.Thr284fs/c.851_852delCA	393	P53	protein_coding	frameshift_variant	HIGH	0	None	0	-1.0	-1.0	0	-1.0	-1.0	0	-1.0	-1.0	-1.0	0	None	0	0	None	None	0.722319	None	None
sa40.ATR2U	57	57	0	CTG/CTG	99.0	689	chr17	7577084	7577087	CTG	indel	del	0.00757575757576	65	1	0	0	0.950550440504	TP53	8	ENST00000269305	aca/	p.Thr284fs/c.851_852delCA	393	P53	protein_coding	frameshift_variant	HIGH	0	None	0	-1.0	-1.0	0	-1.0	-1.0	0	-1.0	-1.0	-1.0	0	None	0	0	None	None	0.722319	None	None
y103.AUMV1	168	167	1	CTG/CTG	99.0	689	chr17	7577084	7577087	CTG	indel	del	0.00757575757576	65	1	0	0	0.950550440504	TP53	8	ENST00000269305	aca/	p.Thr284fs/c.851_852delCA	393	P53	protein_coding	frameshift_variant	HIGH	0	None	0	-1.0	-1.0	0	-1.0	-1.0	0	-1.0	-1.0	-1.0	0	None	0	0	None	None	0.722319	None	None
y104.ATR2U	8	8	0	CTG/CTG	21.0	689	chr17	7577084	7577087	CTG	indel	del	0.00757575757576	65	1	0	0	0.950550440504	TP53	8	ENST00000269305	aca/	p.Thr284fs/c.851_852delCA	393	P53	protein_coding	frameshift_variant	HIGH	0	None	0	-1.0	-1.0	0	-1.0	-1.0	0	-1.0	-1.0	-1.0	0	None	0	0	None	None	0.722319	None	None
y109b.AUMV1	16	16	0	CTG/CTG	48.0	689	chr17	7577084	7577087	CTG	indel	del	0.00757575757576	65	1	0	0	0.950550440504	TP53	8	ENST00000269305	aca/	p.Thr284fs/c.851_852delCA	393	P53	protein_coding	frameshift_variant	HIGH	0	None	0	-1.0	-1.0	0	-1.0	-1.0	0	-1.0	-1.0	-1.0	0	None	0	0	None	None	0.722319	None	None
y110b.AUMV1	10	10	0	CTG/CTG	21.0	689	chr17	7577084	7577087	CTG	indel	del	0.00757575757576	65	1	0	0	0.950550440504	TP53	8	ENST00000269305	aca/	p.Thr284fs/c.851_852delCA	393	P53	protein_coding	frameshift_variant	HIGH	0	None	0	-1.0	-1.0	0	-1.0	-1.0	0	-1.0	-1.0	-1.0	0	None	0	0	None	None	0.722319	None	None
y128b.AUMV1	128	128	0	CTG/CTG	99.0	689	chr17	7577084	7577087	CTG	indel	del	0.00757575757576	65	1	0	0	0.950550440504	TP53	8	ENST00000269305	aca/	p.Thr284fs/c.851_852delCA	393	P53	protein_coding	frameshift_variant	HIGH	0	None	0	-1.0	-1.0	0	-1.0	-1.0	0	-1.0	-1.0	-1.0	0	None	0	0	None	None	0.722319	None	None
y132b.AUMV1	23	23	0	CTG/CTG	60.0	689	chr17	7577084	7577087	CTG	indel	del	0.00757575757576	65	1	0	0	0.950550440504	TP53	8	ENST00000269305	aca/	p.Thr284fs/c.851_852delCA	393	P53	protein_coding	frameshift_variant	HIGH	0	None	0	-1.0	-1.0	0	-1.0	-1.0	0	-1.0	-1.0	-1.0	0	None	0	0	None	None	0.722319	None	None
y134b.AL9E5	144	144	0	CTG/CTG	99.0	689	chr17	7577084	7577087	CTG	indel	del	0.00757575757576	65	1	0	0	0.950550440504	TP53	8	ENST00000269305	aca/	p.Thr284fs/c.851_852delCA	393	P53	protein_coding	frameshift_variant	HIGH	0	None	0	-1.0	-1.0	0	-1.0	-1.0	0	-1.0	-1.0	-1.0	0	None	0	0	None	None	0.722319	None	None
y144c.AUMV1	64	64	0	CTG/CTG	99.0	689	chr17	7577084	7577087	CTG	indel	del	0.00757575757576	65	1	0	0	0.950550440504	TP53	8	ENST00000269305	aca/	p.Thr284fs/c.851_852delCA	393	P53	protein_coding	frameshift_variant	HIGH	0	None	0	-1.0	-1.0	0	-1.0	-1.0	0	-1.0	-1.0	-1.0	0	None	0	0	None	None	0.722319	None	None
y147c.AUMV1	169	168	1	CTG/CTG	99.0	689	chr17	7577084	7577087	CTG	indel	del	0.00757575757576	65	1	0	0	0.950550440504	TP53	8	ENST00000269305	aca/	p.Thr284fs/c.851_852delCA	393	P53	protein_coding	frameshift_variant	HIGH	0	None	0	-1.0	-1.0	0	-1.0	-1.0	0	-1.0	-1.0	-1.0	0	None	0	0	None	None	0.722319	None	None
y162c.ATR2U	22	22	0	CTG/CTG	63.0	689	chr17	7577084	7577087	CTG	indel	del	0.00757575757576	65	1	0	0	0.950550440504	TP53	8	ENST00000269305	aca/	p.Thr284fs/c.851_852delCA	393	P53	protein_coding	frameshift_variant	HIGH	0	None	0	-1.0	-1.0	0	-1.0	-1.0	0	-1.0	-1.0	-1.0	0	None	0	0	None	None	0.722319	None	None
y179f.AL9E5	139	138	1	CTG/CTG	99.0	689	chr17	7577084	7577087	CTG	indel	del	0.00757575757576	65	1	0	0	0.950550440504	TP53	8	ENST00000269305	aca/	p.Thr284fs/c.851_852delCA	393	P53	protein_coding	frameshift_variant	HIGH	0	None	0	-1.0	-1.0	0	-1.0	-1.0	0	-1.0	-1.0	-1.0	0	None	0	0	None	None	0.722319	None	None
y183b.AUMV1	78	78	0	CTG/CTG	99.0	689	chr17	7577084	7577087	CTG	indel	del	0.00757575757576	65	1	0	0	0.950550440504	TP53	8	ENST00000269305	aca/	p.Thr284fs/c.851_852delCA	393	P53	protein_coding	frameshift_variant	HIGH	0	None	0	-1.0	-1.0	0	-1.0	-1.0	0	-1.0	-1.0	-1.0	0	None	0	0	None	None	0.722319	None	None
y188b.AUMV1	34	34	0	CTG/CTG	96.0	689	chr17	7577084	7577087	CTG	indel	del	0.00757575757576	65	1	0	0	0.950550440504	TP53	8	ENST00000269305	aca/	p.Thr284fs/c.851_852delCA	393	P53	protein_coding	frameshift_variant	HIGH	0	None	0	-1.0	-1.0	0	-1.0	-1.0	0	-1.0	-1.0	-1.0	0	None	0	0	None	None	0.722319	None	None
y199b.AL9E5	113	113	0	CTG/CTG	99.0	689	chr17	7577084	7577087	CTG	indel	del	0.00757575757576	65	1	0	0	0.950550440504	TP53	8	ENST00000269305	aca/	p.Thr284fs/c.851_852delCA	393	P53	protein_coding	frameshift_variant	HIGH	0	None	0	-1.0	-1.0	0	-1.0	-1.0	0	-1.0	-1.0	-1.0	0	None	0	0	None	None	0.722319	None	None
y3.AUMV1	34	34	0	CTG/CTG	99.0	689	chr17	7577084	7577087	CTG	indel	del	0.00757575757576	65	1	0	0	0.950550440504	TP53	8	ENST00000269305	aca/	p.Thr284fs/c.851_852delCA	393	P53	protein_coding	frameshift_variant	HIGH	0	None	0	-1.0	-1.0	0	-1.0	-1.0	0	-1.0	-1.0	-1.0	0	None	0	0	None	None	0.722319	None	None
y68.ATR2U	79	79	0	CTG/CTG	99.0	689	chr17	7577084	7577087	CTG	indel	del	0.00757575757576	65	1	0	0	0.950550440504	TP53	8	ENST00000269305	aca/	p.Thr284fs/c.851_852delCA	393	P53	protein_coding	frameshift_variant	HIGH	0	None	0	-1.0	-1.0	0	-1.0	-1.0	0	-1.0	-1.0	-1.0	0	None	0	0	None	None	0.722319	None	None
y77.AL9E5	116	116	0	CTG/CTG	99.0	689	chr17	7577084	7577087	CTG	indel	del	0.00757575757576	65	1	0	0	0.950550440504	TP53	8	ENST00000269305	aca/	p.Thr284fs/c.851_852delCA	393	P53	protein_coding	frameshift_variant	HIGH	0	None	0	-1.0	-1.0	0	-1.0	-1.0	0	-1.0	-1.0	-1.0	0	None	0	0	None	None	0.722319	None	None
y88.AUMV1	10	10	0	CTG/CTG	30.0	689	chr17	7577084	7577087	CTG	indel	del	0.00757575757576	65	1	0	0	0.950550440504	TP53	8	ENST00000269305	aca/	p.Thr284fs/c.851_852delCA	393	P53	protein_coding	frameshift_variant	HIGH	0	None	0	-1.0	-1.0	0	-1.0	-1.0	0	-1.0	-1.0	-1.0	0	None	0	0	None	None	0.722319	None	None
22.AUMV1	122	106	16	CTG/C	99.0	689	chr17	7577084	7577087	CTG	indel	del	0.00757575757576	65	1	0	0	0.950550440504	TP53	8	ENST00000269305	aca/	p.Thr284fs/c.851_852delCA	393	P53	protein_coding	frameshift_variant	HIGH	0	None	0	-1.0	-1.0	0	-1.0	-1.0	0	-1.0	-1.0	-1.0	0	None	0	0	None	None	0.722319	None	None
1.ATR2U	129	129	0	G/G	99.0	690	chr17	7577093	7577094	G	snp	tv	0.00757575757576	65	1	0	0	0.950550440504	TP53	8	ENST00000269305	Cgg/Ggg	p.Arg282Gly/c.844C>G	393	P53	protein_coding	missense_variant	MED	1	rs28934574	0	-1.0	-1.0	0	-1.0	-1.0	0	-1.0	-1.0	-1.0	1	None	0	0	3.74	19.01	0.722319	pathogenic	Hereditary_cancer-predisposing_syndrome
10.ATU14	33	33	0	G/G	87.0	690	chr17	7577093	7577094	G	snp	tv	0.00757575757576	65	1	0	0	0.950550440504	TP53	8	ENST00000269305	Cgg/Ggg	p.Arg282Gly/c.844C>G	393	P53	protein_coding	missense_variant	MED	1	rs28934574	0	-1.0	-1.0	0	-1.0	-1.0	0	-1.0	-1.0	-1.0	1	None	0	0	3.74	19.01	0.722319	pathogenic	Hereditary_cancer-predisposing_syndrome
17.AUMV1	120	120	0	G/G	99.0	690	chr17	7577093	7577094	G	snp	tv	0.00757575757576	65	1	0	0	0.950550440504	TP53	8	ENST00000269305	Cgg/Ggg	p.Arg282Gly/c.844C>G	393	P53	protein_coding	missense_variant	MED	1	rs28934574	0	-1.0	-1.0	0	-1.0	-1.0	0	-1.0	-1.0	-1.0	1	None	0	0	3.74	19.01	0.722319	pathogenic	Hereditary_cancer-predisposing_syndrome
2.ATR2U	208	207	1	G/G	99.0	690	chr17	7577093	7577094	G	snp	tv	0.00757575757576	65	1	0	0	0.950550440504	TP53	8	ENST00000269305	Cgg/Ggg	p.Arg282Gly/c.844C>G	393	P53	protein_coding	missense_variant	MED	1	rs28934574	0	-1.0	-1.0	0	-1.0	-1.0	0	-1.0	-1.0	-1.0	1	None	0	0	3.74	19.01	0.722319	pathogenic	Hereditary_cancer-predisposing_syndrome
21.AL9E5	16	16	0	G/G	42.0	690	chr17	7577093	7577094	G	snp	tv	0.00757575757576	65	1	0	0	0.950550440504	TP53	8	ENST00000269305	Cgg/Ggg	p.Arg282Gly/c.844C>G	393	P53	protein_coding	missense_variant	MED	1	rs28934574	0	-1.0	-1.0	0	-1.0	-1.0	0	-1.0	-1.0	-1.0	1	None	0	0	3.74	19.01	0.722319	pathogenic	Hereditary_cancer-predisposing_syndrome
22.AUMV1	135	135	0	G/G	99.0	690	chr17	7577093	7577094	G	snp	tv	0.00757575757576	65	1	0	0	0.950550440504	TP53	8	ENST00000269305	Cgg/Ggg	p.Arg282Gly/c.844C>G	393	P53	protein_coding	missense_variant	MED	1	rs28934574	0	-1.0	-1.0	0	-1.0	-1.0	0	-1.0	-1.0	-1.0	1	None	0	0	3.74	19.01	0.722319	pathogenic	Hereditary_cancer-predisposing_syndrome
26.ATU14	88	88	0	G/G	99.0	690	chr17	7577093	7577094	G	snp	tv	0.00757575757576	65	1	0	0	0.950550440504	TP53	8	ENST00000269305	Cgg/Ggg	p.Arg282Gly/c.844C>G	393	P53	protein_coding	missense_variant	MED	1	rs28934574	0	-1.0	-1.0	0	-1.0	-1.0	0	-1.0	-1.0	-1.0	1	None	0	0	3.74	19.01	0.722319	pathogenic	Hereditary_cancer-predisposing_syndrome
31.ATU14	156	156	0	G/G	99.0	690	chr17	7577093	7577094	G	snp	tv	0.00757575757576	65	1	0	0	0.950550440504	TP53	8	ENST00000269305	Cgg/Ggg	p.Arg282Gly/c.844C>G	393	P53	protein_coding	missense_variant	MED	1	rs28934574	0	-1.0	-1.0	0	-1.0	-1.0	0	-1.0	-1.0	-1.0	1	None	0	0	3.74	19.01	0.722319	pathogenic	Hereditary_cancer-predisposing_syndrome
35.ATU14	24	24	0	G/G	66.0	690	chr17	7577093	7577094	G	snp	tv	0.00757575757576	65	1	0	0	0.950550440504	TP53	8	ENST00000269305	Cgg/Ggg	p.Arg282Gly/c.844C>G	393	P53	protein_coding	missense_variant	MED	1	rs28934574	0	-1.0	-1.0	0	-1.0	-1.0	0	-1.0	-1.0	-1.0	1	None	0	0	3.74	19.01	0.722319	pathogenic	Hereditary_cancer-predisposing_syndrome
37.ATU14	57	57	0	G/G	99.0	690	chr17	7577093	7577094	G	snp	tv	0.00757575757576	65	1	0	0	0.950550440504	TP53	8	ENST00000269305	Cgg/Ggg	p.Arg282Gly/c.844C>G	393	P53	protein_coding	missense_variant	MED	1	rs28934574	0	-1.0	-1.0	0	-1.0	-1.0	0	-1.0	-1.0	-1.0	1	None	0	0	3.74	19.01	0.722319	pathogenic	Hereditary_cancer-predisposing_syndrome
45.ATU14	43	43	0	G/G	99.0	690	chr17	7577093	7577094	G	snp	tv	0.00757575757576	65	1	0	0	0.950550440504	TP53	8	ENST00000269305	Cgg/Ggg	p.Arg282Gly/c.844C>G	393	P53	protein_coding	missense_variant	MED	1	rs28934574	0	-1.0	-1.0	0	-1.0	-1.0	0	-1.0	-1.0	-1.0	1	None	0	0	3.74	19.01	0.722319	pathogenic	Hereditary_cancer-predisposing_syndrome
5.ATR2U	136	133	3	G/G	99.0	690	chr17	7577093	7577094	G	snp	tv	0.00757575757576	65	1	0	0	0.950550440504	TP53	8	ENST00000269305	Cgg/Ggg	p.Arg282Gly/c.844C>G	393	P53	protein_coding	missense_variant	MED	1	rs28934574	0	-1.0	-1.0	0	-1.0	-1.0	0	-1.0	-1.0	-1.0	1	None	0	0	3.74	19.01	0.722319	pathogenic	Hereditary_cancer-predisposing_syndrome
63n.AUMV1	55	55	0	G/G	99.0	690	chr17	7577093	7577094	G	snp	tv	0.00757575757576	65	1	0	0	0.950550440504	TP53	8	ENST00000269305	Cgg/Ggg	p.Arg282Gly/c.844C>G	393	P53	protein_coding	missense_variant	MED	1	rs28934574	0	-1.0	-1.0	0	-1.0	-1.0	0	-1.0	-1.0	-1.0	1	None	0	0	3.74	19.01	0.722319	pathogenic	Hereditary_cancer-predisposing_syndrome
7.A8P8B	100	99	1	G/G	99.0	690	chr17	7577093	7577094	G	snp	tv	0.00757575757576	65	1	0	0	0.950550440504	TP53	8	ENST00000269305	Cgg/Ggg	p.Arg282Gly/c.844C>G	393	P53	protein_coding	missense_variant	MED	1	rs28934574	0	-1.0	-1.0	0	-1.0	-1.0	0	-1.0	-1.0	-1.0	1	None	0	0	3.74	19.01	0.722319	pathogenic	Hereditary_cancer-predisposing_syndrome
72.ATR2U	159	158	1	G/G	99.0	690	chr17	7577093	7577094	G	snp	tv	0.00757575757576	65	1	0	0	0.950550440504	TP53	8	ENST00000269305	Cgg/Ggg	p.Arg282Gly/c.844C>G	393	P53	protein_coding	missense_variant	MED	1	rs28934574	0	-1.0	-1.0	0	-1.0	-1.0	0	-1.0	-1.0	-1.0	1	None	0	0	3.74	19.01	0.722319	pathogenic	Hereditary_cancer-predisposing_syndrome
82.ATR2U	96	95	1	G/G	99.0	690	chr17	7577093	7577094	G	snp	tv	0.00757575757576	65	1	0	0	0.950550440504	TP53	8	ENST00000269305	Cgg/Ggg	p.Arg282Gly/c.844C>G	393	P53	protein_coding	missense_variant	MED	1	rs28934574	0	-1.0	-1.0	0	-1.0	-1.0	0	-1.0	-1.0	-1.0	1	None	0	0	3.74	19.01	0.722319	pathogenic	Hereditary_cancer-predisposing_syndrome
84.ATR2U	125	125	0	G/G	99.0	690	chr17	7577093	7577094	G	snp	tv	0.00757575757576	65	1	0	0	0.950550440504	TP53	8	ENST00000269305	Cgg/Ggg	p.Arg282Gly/c.844C>G	393	P53	protein_coding	missense_variant	MED	1	rs28934574	0	-1.0	-1.0	0	-1.0	-1.0	0	-1.0	-1.0	-1.0	1	None	0	0	3.74	19.01	0.722319	pathogenic	Hereditary_cancer-predisposing_syndrome
91n.AUMV1	40	40	0	G/G	99.0	690	chr17	7577093	7577094	G	snp	tv	0.00757575757576	65	1	0	0	0.950550440504	TP53	8	ENST00000269305	Cgg/Ggg	p.Arg282Gly/c.844C>G	393	P53	protein_coding	missense_variant	MED	1	rs28934574	0	-1.0	-1.0	0	-1.0	-1.0	0	-1.0	-1.0	-1.0	1	None	0	0	3.74	19.01	0.722319	pathogenic	Hereditary_cancer-predisposing_syndrome
BS2.ATU14	24	24	0	G/G	72.0	690	chr17	7577093	7577094	G	snp	tv	0.00757575757576	65	1	0	0	0.950550440504	TP53	8	ENST00000269305	Cgg/Ggg	p.Arg282Gly/c.844C>G	393	P53	protein_coding	missense_variant	MED	1	rs28934574	0	-1.0	-1.0	0	-1.0	-1.0	0	-1.0	-1.0	-1.0	1	None	0	0	3.74	19.01	0.722319	pathogenic	Hereditary_cancer-predisposing_syndrome
PS1.A8P8B	64	63	1	G/G	99.0	690	chr17	7577093	7577094	G	snp	tv	0.00757575757576	65	1	0	0	0.950550440504	TP53	8	ENST00000269305	Cgg/Ggg	p.Arg282Gly/c.844C>G	393	P53	protein_coding	missense_variant	MED	1	rs28934574	0	-1.0	-1.0	0	-1.0	-1.0	0	-1.0	-1.0	-1.0	1	None	0	0	3.74	19.01	0.722319	pathogenic	Hereditary_cancer-predisposing_syndrome
PS2.A8P8B	42	42	0	G/G	99.0	690	chr17	7577093	7577094	G	snp	tv	0.00757575757576	65	1	0	0	0.950550440504	TP53	8	ENST00000269305	Cgg/Ggg	p.Arg282Gly/c.844C>G	393	P53	protein_coding	missense_variant	MED	1	rs28934574	0	-1.0	-1.0	0	-1.0	-1.0	0	-1.0	-1.0	-1.0	1	None	0	0	3.74	19.01	0.722319	pathogenic	Hereditary_cancer-predisposing_syndrome
SA23.ATU14	74	74	0	G/G	99.0	690	chr17	7577093	7577094	G	snp	tv	0.00757575757576	65	1	0	0	0.950550440504	TP53	8	ENST00000269305	Cgg/Ggg	p.Arg282Gly/c.844C>G	393	P53	protein_coding	missense_variant	MED	1	rs28934574	0	-1.0	-1.0	0	-1.0	-1.0	0	-1.0	-1.0	-1.0	1	None	0	0	3.74	19.01	0.722319	pathogenic	Hereditary_cancer-predisposing_syndrome
SA36.A8P8B	12	12	0	G/G	36.0	690	chr17	7577093	7577094	G	snp	tv	0.00757575757576	65	1	0	0	0.950550440504	TP53	8	ENST00000269305	Cgg/Ggg	p.Arg282Gly/c.844C>G	393	P53	protein_coding	missense_variant	MED	1	rs28934574	0	-1.0	-1.0	0	-1.0	-1.0	0	-1.0	-1.0	-1.0	1	None	0	0	3.74	19.01	0.722319	pathogenic	Hereditary_cancer-predisposing_syndrome
SA38.ATU14	14	14	0	G/G	33.0	690	chr17	7577093	7577094	G	snp	tv	0.00757575757576	65	1	0	0	0.950550440504	TP53	8	ENST00000269305	Cgg/Ggg	p.Arg282Gly/c.844C>G	393	P53	protein_coding	missense_variant	MED	1	rs28934574	0	-1.0	-1.0	0	-1.0	-1.0	0	-1.0	-1.0	-1.0	1	None	0	0	3.74	19.01	0.722319	pathogenic	Hereditary_cancer-predisposing_syndrome
SA41.ATU14	119	119	0	G/G	99.0	690	chr17	7577093	7577094	G	snp	tv	0.00757575757576	65	1	0	0	0.950550440504	TP53	8	ENST00000269305	Cgg/Ggg	p.Arg282Gly/c.844C>G	393	P53	protein_coding	missense_variant	MED	1	rs28934574	0	-1.0	-1.0	0	-1.0	-1.0	0	-1.0	-1.0	-1.0	1	None	0	0	3.74	19.01	0.722319	pathogenic	Hereditary_cancer-predisposing_syndrome
Y105.ATU14	25	25	0	G/G	75.0	690	chr17	7577093	7577094	G	snp	tv	0.00757575757576	65	1	0	0	0.950550440504	TP53	8	ENST00000269305	Cgg/Ggg	p.Arg282Gly/c.844C>G	393	P53	protein_coding	missense_variant	MED	1	rs28934574	0	-1.0	-1.0	0	-1.0	-1.0	0	-1.0	-1.0	-1.0	1	None	0	0	3.74	19.01	0.722319	pathogenic	Hereditary_cancer-predisposing_syndrome
Y115B.ATU14	102	102	0	G/G	99.0	690	chr17	7577093	7577094	G	snp	tv	0.00757575757576	65	1	0	0	0.950550440504	TP53	8	ENST00000269305	Cgg/Ggg	p.Arg282Gly/c.844C>G	393	P53	protein_coding	missense_variant	MED	1	rs28934574	0	-1.0	-1.0	0	-1.0	-1.0	0	-1.0	-1.0	-1.0	1	None	0	0	3.74	19.01	0.722319	pathogenic	Hereditary_cancer-predisposing_syndrome
Y123B.ATU14	165	165	0	G/G	99.0	690	chr17	7577093	7577094	G	snp	tv	0.00757575757576	65	1	0	0	0.950550440504	TP53	8	ENST00000269305	Cgg/Ggg	p.Arg282Gly/c.844C>G	393	P53	protein_coding	missense_variant	MED	1	rs28934574	0	-1.0	-1.0	0	-1.0	-1.0	0	-1.0	-1.0	-1.0	1	None	0	0	3.74	19.01	0.722319	pathogenic	Hereditary_cancer-predisposing_syndrome
Y135.ATU14	230	229	1	G/G	99.0	690	chr17	7577093	7577094	G	snp	tv	0.00757575757576	65	1	0	0	0.950550440504	TP53	8	ENST00000269305	Cgg/Ggg	p.Arg282Gly/c.844C>G	393	P53	protein_coding	missense_variant	MED	1	rs28934574	0	-1.0	-1.0	0	-1.0	-1.0	0	-1.0	-1.0	-1.0	1	None	0	0	3.74	19.01	0.722319	pathogenic	Hereditary_cancer-predisposing_syndrome
Y137B.ATU14	69	67	2	G/G	99.0	690	chr17	7577093	7577094	G	snp	tv	0.00757575757576	65	1	0	0	0.950550440504	TP53	8	ENST00000269305	Cgg/Ggg	p.Arg282Gly/c.844C>G	393	P53	protein_coding	missense_variant	MED	1	rs28934574	0	-1.0	-1.0	0	-1.0	-1.0	0	-1.0	-1.0	-1.0	1	None	0	0	3.74	19.01	0.722319	pathogenic	Hereditary_cancer-predisposing_syndrome
Y143C.ATU14	55	55	0	G/G	99.0	690	chr17	7577093	7577094	G	snp	tv	0.00757575757576	65	1	0	0	0.950550440504	TP53	8	ENST00000269305	Cgg/Ggg	p.Arg282Gly/c.844C>G	393	P53	protein_coding	missense_variant	MED	1	rs28934574	0	-1.0	-1.0	0	-1.0	-1.0	0	-1.0	-1.0	-1.0	1	None	0	0	3.74	19.01	0.722319	pathogenic	Hereditary_cancer-predisposing_syndrome
Y145B.ATU14	274	274	0	G/G	99.0	690	chr17	7577093	7577094	G	snp	tv	0.00757575757576	65	1	0	0	0.950550440504	TP53	8	ENST00000269305	Cgg/Ggg	p.Arg282Gly/c.844C>G	393	P53	protein_coding	missense_variant	MED	1	rs28934574	0	-1.0	-1.0	0	-1.0	-1.0	0	-1.0	-1.0	-1.0	1	None	0	0	3.74	19.01	0.722319	pathogenic	Hereditary_cancer-predisposing_syndrome
Y146B.A8P8B	18	18	0	G/G	45.0	690	chr17	7577093	7577094	G	snp	tv	0.00757575757576	65	1	0	0	0.950550440504	TP53	8	ENST00000269305	Cgg/Ggg	p.Arg282Gly/c.844C>G	393	P53	protein_coding	missense_variant	MED	1	rs28934574	0	-1.0	-1.0	0	-1.0	-1.0	0	-1.0	-1.0	-1.0	1	None	0	0	3.74	19.01	0.722319	pathogenic	Hereditary_cancer-predisposing_syndrome
Y151B.ATU14	50	50	0	G/G	99.0	690	chr17	7577093	7577094	G	snp	tv	0.00757575757576	65	1	0	0	0.950550440504	TP53	8	ENST00000269305	Cgg/Ggg	p.Arg282Gly/c.844C>G	393	P53	protein_coding	missense_variant	MED	1	rs28934574	0	-1.0	-1.0	0	-1.0	-1.0	0	-1.0	-1.0	-1.0	1	None	0	0	3.74	19.01	0.722319	pathogenic	Hereditary_cancer-predisposing_syndrome
Y159C.ATU14	35	33	2	G/G	76.0	690	chr17	7577093	7577094	G	snp	tv	0.00757575757576	65	1	0	0	0.950550440504	TP53	8	ENST00000269305	Cgg/Ggg	p.Arg282Gly/c.844C>G	393	P53	protein_coding	missense_variant	MED	1	rs28934574	0	-1.0	-1.0	0	-1.0	-1.0	0	-1.0	-1.0	-1.0	1	None	0	0	3.74	19.01	0.722319	pathogenic	Hereditary_cancer-predisposing_syndrome
Y161C.ATU14	12	11	1	G/G	21.0	690	chr17	7577093	7577094	G	snp	tv	0.00757575757576	65	1	0	0	0.950550440504	TP53	8	ENST00000269305	Cgg/Ggg	p.Arg282Gly/c.844C>G	393	P53	protein_coding	missense_variant	MED	1	rs28934574	0	-1.0	-1.0	0	-1.0	-1.0	0	-1.0	-1.0	-1.0	1	None	0	0	3.74	19.01	0.722319	pathogenic	Hereditary_cancer-predisposing_syndrome
Y165B.ATU14	102	102	0	G/G	99.0	690	chr17	7577093	7577094	G	snp	tv	0.00757575757576	65	1	0	0	0.950550440504	TP53	8	ENST00000269305	Cgg/Ggg	p.Arg282Gly/c.844C>G	393	P53	protein_coding	missense_variant	MED	1	rs28934574	0	-1.0	-1.0	0	-1.0	-1.0	0	-1.0	-1.0	-1.0	1	None	0	0	3.74	19.01	0.722319	pathogenic	Hereditary_cancer-predisposing_syndrome
Y167B.A8P8B	35	35	0	G/G	99.0	690	chr17	7577093	7577094	G	snp	tv	0.00757575757576	65	1	0	0	0.950550440504	TP53	8	ENST00000269305	Cgg/Ggg	p.Arg282Gly/c.844C>G	393	P53	protein_coding	missense_variant	MED	1	rs28934574	0	-1.0	-1.0	0	-1.0	-1.0	0	-1.0	-1.0	-1.0	1	None	0	0	3.74	19.01	0.722319	pathogenic	Hereditary_cancer-predisposing_syndrome
Y169C.ATU14	53	51	2	G/G	99.0	690	chr17	7577093	7577094	G	snp	tv	0.00757575757576	65	1	0	0	0.950550440504	TP53	8	ENST00000269305	Cgg/Ggg	p.Arg282Gly/c.844C>G	393	P53	protein_coding	missense_variant	MED	1	rs28934574	0	-1.0	-1.0	0	-1.0	-1.0	0	-1.0	-1.0	-1.0	1	None	0	0	3.74	19.01	0.722319	pathogenic	Hereditary_cancer-predisposing_syndrome
ps4.AL9E5	95	94	1	G/G	99.0	690	chr17	7577093	7577094	G	snp	tv	0.00757575757576	65	1	0	0	0.950550440504	TP53	8	ENST00000269305	Cgg/Ggg	p.Arg282Gly/c.844C>G	393	P53	protein_coding	missense_variant	MED	1	rs28934574	0	-1.0	-1.0	0	-1.0	-1.0	0	-1.0	-1.0	-1.0	1	None	0	0	3.74	19.01	0.722319	pathogenic	Hereditary_cancer-predisposing_syndrome
ps6.AUMV1	31	31	0	G/G	87.0	690	chr17	7577093	7577094	G	snp	tv	0.00757575757576	65	1	0	0	0.950550440504	TP53	8	ENST00000269305	Cgg/Ggg	p.Arg282Gly/c.844C>G	393	P53	protein_coding	missense_variant	MED	1	rs28934574	0	-1.0	-1.0	0	-1.0	-1.0	0	-1.0	-1.0	-1.0	1	None	0	0	3.74	19.01	0.722319	pathogenic	Hereditary_cancer-predisposing_syndrome
sa14.AL9E5	122	122	0	G/G	99.0	690	chr17	7577093	7577094	G	snp	tv	0.00757575757576	65	1	0	0	0.950550440504	TP53	8	ENST00000269305	Cgg/Ggg	p.Arg282Gly/c.844C>G	393	P53	protein_coding	missense_variant	MED	1	rs28934574	0	-1.0	-1.0	0	-1.0	-1.0	0	-1.0	-1.0	-1.0	1	None	0	0	3.74	19.01	0.722319	pathogenic	Hereditary_cancer-predisposing_syndrome
sa39.AL9E5	24	24	0	G/G	57.0	690	chr17	7577093	7577094	G	snp	tv	0.00757575757576	65	1	0	0	0.950550440504	TP53	8	ENST00000269305	Cgg/Ggg	p.Arg282Gly/c.844C>G	393	P53	protein_coding	missense_variant	MED	1	rs28934574	0	-1.0	-1.0	0	-1.0	-1.0	0	-1.0	-1.0	-1.0	1	None	0	0	3.74	19.01	0.722319	pathogenic	Hereditary_cancer-predisposing_syndrome
sa40.ATR2U	61	61	0	G/G	99.0	690	chr17	7577093	7577094	G	snp	tv	0.00757575757576	65	1	0	0	0.950550440504	TP53	8	ENST00000269305	Cgg/Ggg	p.Arg282Gly/c.844C>G	393	P53	protein_coding	missense_variant	MED	1	rs28934574	0	-1.0	-1.0	0	-1.0	-1.0	0	-1.0	-1.0	-1.0	1	None	0	0	3.74	19.01	0.722319	pathogenic	Hereditary_cancer-predisposing_syndrome
y103.AUMV1	163	162	1	G/G	99.0	690	chr17	7577093	7577094	G	snp	tv	0.00757575757576	65	1	0	0	0.950550440504	TP53	8	ENST00000269305	Cgg/Ggg	p.Arg282Gly/c.844C>G	393	P53	protein_coding	missense_variant	MED	1	rs28934574	0	-1.0	-1.0	0	-1.0	-1.0	0	-1.0	-1.0	-1.0	1	None	0	0	3.74	19.01	0.722319	pathogenic	Hereditary_cancer-predisposing_syndrome
y104.ATR2U	11	11	0	G/G	33.0	690	chr17	7577093	7577094	G	snp	tv	0.00757575757576	65	1	0	0	0.950550440504	TP53	8	ENST00000269305	Cgg/Ggg	p.Arg282Gly/c.844C>G	393	P53	protein_coding	missense_variant	MED	1	rs28934574	0	-1.0	-1.0	0	-1.0	-1.0	0	-1.0	-1.0	-1.0	1	None	0	0	3.74	19.01	0.722319	pathogenic	Hereditary_cancer-predisposing_syndrome
y109b.AUMV1	16	16	0	G/G	45.0	690	chr17	7577093	7577094	G	snp	tv	0.00757575757576	65	1	0	0	0.950550440504	TP53	8	ENST00000269305	Cgg/Ggg	p.Arg282Gly/c.844C>G	393	P53	protein_coding	missense_variant	MED	1	rs28934574	0	-1.0	-1.0	0	-1.0	-1.0	0	-1.0	-1.0	-1.0	1	None	0	0	3.74	19.01	0.722319	pathogenic	Hereditary_cancer-predisposing_syndrome
y128b.AUMV1	120	119	1	G/G	99.0	690	chr17	7577093	7577094	G	snp	tv	0.00757575757576	65	1	0	0	0.950550440504	TP53	8	ENST00000269305	Cgg/Ggg	p.Arg282Gly/c.844C>G	393	P53	protein_coding	missense_variant	MED	1	rs28934574	0	-1.0	-1.0	0	-1.0	-1.0	0	-1.0	-1.0	-1.0	1	None	0	0	3.74	19.01	0.722319	pathogenic	Hereditary_cancer-predisposing_syndrome
y132b.AUMV1	29	29	0	G/G	84.0	690	chr17	7577093	7577094	G	snp	tv	0.00757575757576	65	1	0	0	0.950550440504	TP53	8	ENST00000269305	Cgg/Ggg	p.Arg282Gly/c.844C>G	393	P53	protein_coding	missense_variant	MED	1	rs28934574	0	-1.0	-1.0	0	-1.0	-1.0	0	-1.0	-1.0	-1.0	1	None	0	0	3.74	19.01	0.722319	pathogenic	Hereditary_cancer-predisposing_syndrome
y134b.AL9E5	150	150	0	G/G	99.0	690	chr17	7577093	7577094	G	snp	tv	0.00757575757576	65	1	0	0	0.950550440504	TP53	8	ENST00000269305	Cgg/Ggg	p.Arg282Gly/c.844C>G	393	P53	protein_coding	missense_variant	MED	1	rs28934574	0	-1.0	-1.0	0	-1.0	-1.0	0	-1.0	-1.0	-1.0	1	None	0	0	3.74	19.01	0.722319	pathogenic	Hereditary_cancer-predisposing_syndrome
y144c.AUMV1	67	67	0	G/G	99.0	690	chr17	7577093	7577094	G	snp	tv	0.00757575757576	65	1	0	0	0.950550440504	TP53	8	ENST00000269305	Cgg/Ggg	p.Arg282Gly/c.844C>G	393	P53	protein_coding	missense_variant	MED	1	rs28934574	0	-1.0	-1.0	0	-1.0	-1.0	0	-1.0	-1.0	-1.0	1	None	0	0	3.74	19.01	0.722319	pathogenic	Hereditary_cancer-predisposing_syndrome
y147c.AUMV1	176	176	0	G/G	99.0	690	chr17	7577093	7577094	G	snp	tv	0.00757575757576	65	1	0	0	0.950550440504	TP53	8	ENST00000269305	Cgg/Ggg	p.Arg282Gly/c.844C>G	393	P53	protein_coding	missense_variant	MED	1	rs28934574	0	-1.0	-1.0	0	-1.0	-1.0	0	-1.0	-1.0	-1.0	1	None	0	0	3.74	19.01	0.722319	pathogenic	Hereditary_cancer-predisposing_syndrome
y162c.ATR2U	30	30	0	G/G	84.0	690	chr17	7577093	7577094	G	snp	tv	0.00757575757576	65	1	0	0	0.950550440504	TP53	8	ENST00000269305	Cgg/Ggg	p.Arg282Gly/c.844C>G	393	P53	protein_coding	missense_variant	MED	1	rs28934574	0	-1.0	-1.0	0	-1.0	-1.0	0	-1.0	-1.0	-1.0	1	None	0	0	3.74	19.01	0.722319	pathogenic	Hereditary_cancer-predisposing_syndrome
y179f.AL9E5	150	150	0	G/G	99.0	690	chr17	7577093	7577094	G	snp	tv	0.00757575757576	65	1	0	0	0.950550440504	TP53	8	ENST00000269305	Cgg/Ggg	p.Arg282Gly/c.844C>G	393	P53	protein_coding	missense_variant	MED	1	rs28934574	0	-1.0	-1.0	0	-1.0	-1.0	0	-1.0	-1.0	-1.0	1	None	0	0	3.74	19.01	0.722319	pathogenic	Hereditary_cancer-predisposing_syndrome
y183b.AUMV1	86	83	3	G/G	99.0	690	chr17	7577093	7577094	G	snp	tv	0.00757575757576	65	1	0	0	0.950550440504	TP53	8	ENST00000269305	Cgg/Ggg	p.Arg282Gly/c.844C>G	393	P53	protein_coding	missense_variant	MED	1	rs28934574	0	-1.0	-1.0	0	-1.0	-1.0	0	-1.0	-1.0	-1.0	1	None	0	0	3.74	19.01	0.722319	pathogenic	Hereditary_cancer-predisposing_syndrome
y188b.AUMV1	46	46	0	G/G	99.0	690	chr17	7577093	7577094	G	snp	tv	0.00757575757576	65	1	0	0	0.950550440504	TP53	8	ENST00000269305	Cgg/Ggg	p.Arg282Gly/c.844C>G	393	P53	protein_coding	missense_variant	MED	1	rs28934574	0	-1.0	-1.0	0	-1.0	-1.0	0	-1.0	-1.0	-1.0	1	None	0	0	3.74	19.01	0.722319	pathogenic	Hereditary_cancer-predisposing_syndrome
y199b.AL9E5	122	119	3	G/G	99.0	690	chr17	7577093	7577094	G	snp	tv	0.00757575757576	65	1	0	0	0.950550440504	TP53	8	ENST00000269305	Cgg/Ggg	p.Arg282Gly/c.844C>G	393	P53	protein_coding	missense_variant	MED	1	rs28934574	0	-1.0	-1.0	0	-1.0	-1.0	0	-1.0	-1.0	-1.0	1	None	0	0	3.74	19.01	0.722319	pathogenic	Hereditary_cancer-predisposing_syndrome
y3.AUMV1	42	41	1	G/G	99.0	690	chr17	7577093	7577094	G	snp	tv	0.00757575757576	65	1	0	0	0.950550440504	TP53	8	ENST00000269305	Cgg/Ggg	p.Arg282Gly/c.844C>G	393	P53	protein_coding	missense_variant	MED	1	rs28934574	0	-1.0	-1.0	0	-1.0	-1.0	0	-1.0	-1.0	-1.0	1	None	0	0	3.74	19.01	0.722319	pathogenic	Hereditary_cancer-predisposing_syndrome
y68.ATR2U	100	100	0	G/G	99.0	690	chr17	7577093	7577094	G	snp	tv	0.00757575757576	65	1	0	0	0.950550440504	TP53	8	ENST00000269305	Cgg/Ggg	p.Arg282Gly/c.844C>G	393	P53	protein_coding	missense_variant	MED	1	rs28934574	0	-1.0	-1.0	0	-1.0	-1.0	0	-1.0	-1.0	-1.0	1	None	0	0	3.74	19.01	0.722319	pathogenic	Hereditary_cancer-predisposing_syndrome
y77.AL9E5	117	117	0	G/G	99.0	690	chr17	7577093	7577094	G	snp	tv	0.00757575757576	65	1	0	0	0.950550440504	TP53	8	ENST00000269305	Cgg/Ggg	p.Arg282Gly/c.844C>G	393	P53	protein_coding	missense_variant	MED	1	rs28934574	0	-1.0	-1.0	0	-1.0	-1.0	0	-1.0	-1.0	-1.0	1	None	0	0	3.74	19.01	0.722319	pathogenic	Hereditary_cancer-predisposing_syndrome
y88.AUMV1	12	12	0	G/G	36.0	690	chr17	7577093	7577094	G	snp	tv	0.00757575757576	65	1	0	0	0.950550440504	TP53	8	ENST00000269305	Cgg/Ggg	p.Arg282Gly/c.844C>G	393	P53	protein_coding	missense_variant	MED	1	rs28934574	0	-1.0	-1.0	0	-1.0	-1.0	0	-1.0	-1.0	-1.0	1	None	0	0	3.74	19.01	0.722319	pathogenic	Hereditary_cancer-predisposing_syndrome
Y102.ATU14	15	11	4	G/C	54.0	690	chr17	7577093	7577094	G	snp	tv	0.00757575757576	65	1	0	0	0.950550440504	TP53	8	ENST00000269305	Cgg/Ggg	p.Arg282Gly/c.844C>G	393	P53	protein_coding	missense_variant	MED	1	rs28934574	0	-1.0	-1.0	0	-1.0	-1.0	0	-1.0	-1.0	-1.0	1	None	0	0	3.74	19.01	0.722319	pathogenic	Hereditary_cancer-predisposing_syndrome
10.ATU14	66	66	0	C/C	99.0	691	chr17	7577119	7577120	C	snp	ts	0.00757575757576	65	1	0	0	0.950550440504	TP53	8	ENST00000269305	cGt/cAt	p.Arg273His/c.818G>A	393	P53	protein_coding	missense_variant	MED	1	rs28934576	0	-1.0	-1.0	1	0.001	0.000199681	1	2.471e-05	2.62816694116e-05	4.7460844803e-05	1	None	0	0	3.53	18.03	0.722319	pathogenic	Li-Fraumeni_syndrome_1|Thyroid_cancer
17.AUMV1	168	168	0	C/C	99.0	691	chr17	7577119	7577120	C	snp	ts	0.00757575757576	65	1	0	0	0.950550440504	TP53	8	ENST00000269305	cGt/cAt	p.Arg273His/c.818G>A	393	P53	protein_coding	missense_variant	MED	1	rs28934576	0	-1.0	-1.0	1	0.001	0.000199681	1	2.471e-05	2.62816694116e-05	4.7460844803e-05	1	None	0	0	3.53	18.03	0.722319	pathogenic	Li-Fraumeni_syndrome_1|Thyroid_cancer
2.ATR2U	270	268	2	C/C	99.0	691	chr17	7577119	7577120	C	snp	ts	0.00757575757576	65	1	0	0	0.950550440504	TP53	8	ENST00000269305	cGt/cAt	p.Arg273His/c.818G>A	393	P53	protein_coding	missense_variant	MED	1	rs28934576	0	-1.0	-1.0	1	0.001	0.000199681	1	2.471e-05	2.62816694116e-05	4.7460844803e-05	1	None	0	0	3.53	18.03	0.722319	pathogenic	Li-Fraumeni_syndrome_1|Thyroid_cancer
21.AL9E5	11	11	0	C/C	30.0	691	chr17	7577119	7577120	C	snp	ts	0.00757575757576	65	1	0	0	0.950550440504	TP53	8	ENST00000269305	cGt/cAt	p.Arg273His/c.818G>A	393	P53	protein_coding	missense_variant	MED	1	rs28934576	0	-1.0	-1.0	1	0.001	0.000199681	1	2.471e-05	2.62816694116e-05	4.7460844803e-05	1	None	0	0	3.53	18.03	0.722319	pathogenic	Li-Fraumeni_syndrome_1|Thyroid_cancer
22.AUMV1	167	166	1	C/C	99.0	691	chr17	7577119	7577120	C	snp	ts	0.00757575757576	65	1	0	0	0.950550440504	TP53	8	ENST00000269305	cGt/cAt	p.Arg273His/c.818G>A	393	P53	protein_coding	missense_variant	MED	1	rs28934576	0	-1.0	-1.0	1	0.001	0.000199681	1	2.471e-05	2.62816694116e-05	4.7460844803e-05	1	None	0	0	3.53	18.03	0.722319	pathogenic	Li-Fraumeni_syndrome_1|Thyroid_cancer
26.ATU14	101	101	0	C/C	99.0	691	chr17	7577119	7577120	C	snp	ts	0.00757575757576	65	1	0	0	0.950550440504	TP53	8	ENST00000269305	cGt/cAt	p.Arg273His/c.818G>A	393	P53	protein_coding	missense_variant	MED	1	rs28934576	0	-1.0	-1.0	1	0.001	0.000199681	1	2.471e-05	2.62816694116e-05	4.7460844803e-05	1	None	0	0	3.53	18.03	0.722319	pathogenic	Li-Fraumeni_syndrome_1|Thyroid_cancer
31.ATU14	194	192	2	C/C	99.0	691	chr17	7577119	7577120	C	snp	ts	0.00757575757576	65	1	0	0	0.950550440504	TP53	8	ENST00000269305	cGt/cAt	p.Arg273His/c.818G>A	393	P53	protein_coding	missense_variant	MED	1	rs28934576	0	-1.0	-1.0	1	0.001	0.000199681	1	2.471e-05	2.62816694116e-05	4.7460844803e-05	1	None	0	0	3.53	18.03	0.722319	pathogenic	Li-Fraumeni_syndrome_1|Thyroid_cancer
35.ATU14	30	30	0	C/C	84.0	691	chr17	7577119	7577120	C	snp	ts	0.00757575757576	65	1	0	0	0.950550440504	TP53	8	ENST00000269305	cGt/cAt	p.Arg273His/c.818G>A	393	P53	protein_coding	missense_variant	MED	1	rs28934576	0	-1.0	-1.0	1	0.001	0.000199681	1	2.471e-05	2.62816694116e-05	4.7460844803e-05	1	None	0	0	3.53	18.03	0.722319	pathogenic	Li-Fraumeni_syndrome_1|Thyroid_cancer
37.ATU14	76	76	0	C/C	99.0	691	chr17	7577119	7577120	C	snp	ts	0.00757575757576	65	1	0	0	0.950550440504	TP53	8	ENST00000269305	cGt/cAt	p.Arg273His/c.818G>A	393	P53	protein_coding	missense_variant	MED	1	rs28934576	0	-1.0	-1.0	1	0.001	0.000199681	1	2.471e-05	2.62816694116e-05	4.7460844803e-05	1	None	0	0	3.53	18.03	0.722319	pathogenic	Li-Fraumeni_syndrome_1|Thyroid_cancer
45.ATU14	75	75	0	C/C	99.0	691	chr17	7577119	7577120	C	snp	ts	0.00757575757576	65	1	0	0	0.950550440504	TP53	8	ENST00000269305	cGt/cAt	p.Arg273His/c.818G>A	393	P53	protein_coding	missense_variant	MED	1	rs28934576	0	-1.0	-1.0	1	0.001	0.000199681	1	2.471e-05	2.62816694116e-05	4.7460844803e-05	1	None	0	0	3.53	18.03	0.722319	pathogenic	Li-Fraumeni_syndrome_1|Thyroid_cancer
5.ATR2U	199	199	0	C/C	99.0	691	chr17	7577119	7577120	C	snp	ts	0.00757575757576	65	1	0	0	0.950550440504	TP53	8	ENST00000269305	cGt/cAt	p.Arg273His/c.818G>A	393	P53	protein_coding	missense_variant	MED	1	rs28934576	0	-1.0	-1.0	1	0.001	0.000199681	1	2.471e-05	2.62816694116e-05	4.7460844803e-05	1	None	0	0	3.53	18.03	0.722319	pathogenic	Li-Fraumeni_syndrome_1|Thyroid_cancer
63n.AUMV1	67	67	0	C/C	99.0	691	chr17	7577119	7577120	C	snp	ts	0.00757575757576	65	1	0	0	0.950550440504	TP53	8	ENST00000269305	cGt/cAt	p.Arg273His/c.818G>A	393	P53	protein_coding	missense_variant	MED	1	rs28934576	0	-1.0	-1.0	1	0.001	0.000199681	1	2.471e-05	2.62816694116e-05	4.7460844803e-05	1	None	0	0	3.53	18.03	0.722319	pathogenic	Li-Fraumeni_syndrome_1|Thyroid_cancer
7.A8P8B	139	139	0	C/C	99.0	691	chr17	7577119	7577120	C	snp	ts	0.00757575757576	65	1	0	0	0.950550440504	TP53	8	ENST00000269305	cGt/cAt	p.Arg273His/c.818G>A	393	P53	protein_coding	missense_variant	MED	1	rs28934576	0	-1.0	-1.0	1	0.001	0.000199681	1	2.471e-05	2.62816694116e-05	4.7460844803e-05	1	None	0	0	3.53	18.03	0.722319	pathogenic	Li-Fraumeni_syndrome_1|Thyroid_cancer
72.ATR2U	225	225	0	C/C	99.0	691	chr17	7577119	7577120	C	snp	ts	0.00757575757576	65	1	0	0	0.950550440504	TP53	8	ENST00000269305	cGt/cAt	p.Arg273His/c.818G>A	393	P53	protein_coding	missense_variant	MED	1	rs28934576	0	-1.0	-1.0	1	0.001	0.000199681	1	2.471e-05	2.62816694116e-05	4.7460844803e-05	1	None	0	0	3.53	18.03	0.722319	pathogenic	Li-Fraumeni_syndrome_1|Thyroid_cancer
82.ATR2U	113	113	0	C/C	99.0	691	chr17	7577119	7577120	C	snp	ts	0.00757575757576	65	1	0	0	0.950550440504	TP53	8	ENST00000269305	cGt/cAt	p.Arg273His/c.818G>A	393	P53	protein_coding	missense_variant	MED	1	rs28934576	0	-1.0	-1.0	1	0.001	0.000199681	1	2.471e-05	2.62816694116e-05	4.7460844803e-05	1	None	0	0	3.53	18.03	0.722319	pathogenic	Li-Fraumeni_syndrome_1|Thyroid_cancer
84.ATR2U	173	173	0	C/C	99.0	691	chr17	7577119	7577120	C	snp	ts	0.00757575757576	65	1	0	0	0.950550440504	TP53	8	ENST00000269305	cGt/cAt	p.Arg273His/c.818G>A	393	P53	protein_coding	missense_variant	MED	1	rs28934576	0	-1.0	-1.0	1	0.001	0.000199681	1	2.471e-05	2.62816694116e-05	4.7460844803e-05	1	None	0	0	3.53	18.03	0.722319	pathogenic	Li-Fraumeni_syndrome_1|Thyroid_cancer
91n.AUMV1	52	52	0	C/C	99.0	691	chr17	7577119	7577120	C	snp	ts	0.00757575757576	65	1	0	0	0.950550440504	TP53	8	ENST00000269305	cGt/cAt	p.Arg273His/c.818G>A	393	P53	protein_coding	missense_variant	MED	1	rs28934576	0	-1.0	-1.0	1	0.001	0.000199681	1	2.471e-05	2.62816694116e-05	4.7460844803e-05	1	None	0	0	3.53	18.03	0.722319	pathogenic	Li-Fraumeni_syndrome_1|Thyroid_cancer
BS2.ATU14	33	33	0	C/C	99.0	691	chr17	7577119	7577120	C	snp	ts	0.00757575757576	65	1	0	0	0.950550440504	TP53	8	ENST00000269305	cGt/cAt	p.Arg273His/c.818G>A	393	P53	protein_coding	missense_variant	MED	1	rs28934576	0	-1.0	-1.0	1	0.001	0.000199681	1	2.471e-05	2.62816694116e-05	4.7460844803e-05	1	None	0	0	3.53	18.03	0.722319	pathogenic	Li-Fraumeni_syndrome_1|Thyroid_cancer
PS1.A8P8B	87	86	1	C/C	99.0	691	chr17	7577119	7577120	C	snp	ts	0.00757575757576	65	1	0	0	0.950550440504	TP53	8	ENST00000269305	cGt/cAt	p.Arg273His/c.818G>A	393	P53	protein_coding	missense_variant	MED	1	rs28934576	0	-1.0	-1.0	1	0.001	0.000199681	1	2.471e-05	2.62816694116e-05	4.7460844803e-05	1	None	0	0	3.53	18.03	0.722319	pathogenic	Li-Fraumeni_syndrome_1|Thyroid_cancer
PS2.A8P8B	74	74	0	C/C	99.0	691	chr17	7577119	7577120	C	snp	ts	0.00757575757576	65	1	0	0	0.950550440504	TP53	8	ENST00000269305	cGt/cAt	p.Arg273His/c.818G>A	393	P53	protein_coding	missense_variant	MED	1	rs28934576	0	-1.0	-1.0	1	0.001	0.000199681	1	2.471e-05	2.62816694116e-05	4.7460844803e-05	1	None	0	0	3.53	18.03	0.722319	pathogenic	Li-Fraumeni_syndrome_1|Thyroid_cancer
SA23.ATU14	110	110	0	C/C	99.0	691	chr17	7577119	7577120	C	snp	ts	0.00757575757576	65	1	0	0	0.950550440504	TP53	8	ENST00000269305	cGt/cAt	p.Arg273His/c.818G>A	393	P53	protein_coding	missense_variant	MED	1	rs28934576	0	-1.0	-1.0	1	0.001	0.000199681	1	2.471e-05	2.62816694116e-05	4.7460844803e-05	1	None	0	0	3.53	18.03	0.722319	pathogenic	Li-Fraumeni_syndrome_1|Thyroid_cancer
SA36.A8P8B	30	30	0	C/C	90.0	691	chr17	7577119	7577120	C	snp	ts	0.00757575757576	65	1	0	0	0.950550440504	TP53	8	ENST00000269305	cGt/cAt	p.Arg273His/c.818G>A	393	P53	protein_coding	missense_variant	MED	1	rs28934576	0	-1.0	-1.0	1	0.001	0.000199681	1	2.471e-05	2.62816694116e-05	4.7460844803e-05	1	None	0	0	3.53	18.03	0.722319	pathogenic	Li-Fraumeni_syndrome_1|Thyroid_cancer
SA38.ATU14	10	10	0	C/C	30.0	691	chr17	7577119	7577120	C	snp	ts	0.00757575757576	65	1	0	0	0.950550440504	TP53	8	ENST00000269305	cGt/cAt	p.Arg273His/c.818G>A	393	P53	protein_coding	missense_variant	MED	1	rs28934576	0	-1.0	-1.0	1	0.001	0.000199681	1	2.471e-05	2.62816694116e-05	4.7460844803e-05	1	None	0	0	3.53	18.03	0.722319	pathogenic	Li-Fraumeni_syndrome_1|Thyroid_cancer
SA41.ATU14	144	144	0	C/C	99.0	691	chr17	7577119	7577120	C	snp	ts	0.00757575757576	65	1	0	0	0.950550440504	TP53	8	ENST00000269305	cGt/cAt	p.Arg273His/c.818G>A	393	P53	protein_coding	missense_variant	MED	1	rs28934576	0	-1.0	-1.0	1	0.001	0.000199681	1	2.471e-05	2.62816694116e-05	4.7460844803e-05	1	None	0	0	3.53	18.03	0.722319	pathogenic	Li-Fraumeni_syndrome_1|Thyroid_cancer
Y102.ATU14	18	18	0	C/C	54.0	691	chr17	7577119	7577120	C	snp	ts	0.00757575757576	65	1	0	0	0.950550440504	TP53	8	ENST00000269305	cGt/cAt	p.Arg273His/c.818G>A	393	P53	protein_coding	missense_variant	MED	1	rs28934576	0	-1.0	-1.0	1	0.001	0.000199681	1	2.471e-05	2.62816694116e-05	4.7460844803e-05	1	None	0	0	3.53	18.03	0.722319	pathogenic	Li-Fraumeni_syndrome_1|Thyroid_cancer
Y105.ATU14	44	44	0	C/C	99.0	691	chr17	7577119	7577120	C	snp	ts	0.00757575757576	65	1	0	0	0.950550440504	TP53	8	ENST00000269305	cGt/cAt	p.Arg273His/c.818G>A	393	P53	protein_coding	missense_variant	MED	1	rs28934576	0	-1.0	-1.0	1	0.001	0.000199681	1	2.471e-05	2.62816694116e-05	4.7460844803e-05	1	None	0	0	3.53	18.03	0.722319	pathogenic	Li-Fraumeni_syndrome_1|Thyroid_cancer
Y115B.ATU14	148	145	3	C/C	99.0	691	chr17	7577119	7577120	C	snp	ts	0.00757575757576	65	1	0	0	0.950550440504	TP53	8	ENST00000269305	cGt/cAt	p.Arg273His/c.818G>A	393	P53	protein_coding	missense_variant	MED	1	rs28934576	0	-1.0	-1.0	1	0.001	0.000199681	1	2.471e-05	2.62816694116e-05	4.7460844803e-05	1	None	0	0	3.53	18.03	0.722319	pathogenic	Li-Fraumeni_syndrome_1|Thyroid_cancer
Y123B.ATU14	212	210	2	C/C	99.0	691	chr17	7577119	7577120	C	snp	ts	0.00757575757576	65	1	0	0	0.950550440504	TP53	8	ENST00000269305	cGt/cAt	p.Arg273His/c.818G>A	393	P53	protein_coding	missense_variant	MED	1	rs28934576	0	-1.0	-1.0	1	0.001	0.000199681	1	2.471e-05	2.62816694116e-05	4.7460844803e-05	1	None	0	0	3.53	18.03	0.722319	pathogenic	Li-Fraumeni_syndrome_1|Thyroid_cancer
Y135.ATU14	267	266	1	C/C	99.0	691	chr17	7577119	7577120	C	snp	ts	0.00757575757576	65	1	0	0	0.950550440504	TP53	8	ENST00000269305	cGt/cAt	p.Arg273His/c.818G>A	393	P53	protein_coding	missense_variant	MED	1	rs28934576	0	-1.0	-1.0	1	0.001	0.000199681	1	2.471e-05	2.62816694116e-05	4.7460844803e-05	1	None	0	0	3.53	18.03	0.722319	pathogenic	Li-Fraumeni_syndrome_1|Thyroid_cancer
Y137B.ATU14	83	83	0	C/C	99.0	691	chr17	7577119	7577120	C	snp	ts	0.00757575757576	65	1	0	0	0.950550440504	TP53	8	ENST00000269305	cGt/cAt	p.Arg273His/c.818G>A	393	P53	protein_coding	missense_variant	MED	1	rs28934576	0	-1.0	-1.0	1	0.001	0.000199681	1	2.471e-05	2.62816694116e-05	4.7460844803e-05	1	None	0	0	3.53	18.03	0.722319	pathogenic	Li-Fraumeni_syndrome_1|Thyroid_cancer
Y143C.ATU14	70	70	0	C/C	99.0	691	chr17	7577119	7577120	C	snp	ts	0.00757575757576	65	1	0	0	0.950550440504	TP53	8	ENST00000269305	cGt/cAt	p.Arg273His/c.818G>A	393	P53	protein_coding	missense_variant	MED	1	rs28934576	0	-1.0	-1.0	1	0.001	0.000199681	1	2.471e-05	2.62816694116e-05	4.7460844803e-05	1	None	0	0	3.53	18.03	0.722319	pathogenic	Li-Fraumeni_syndrome_1|Thyroid_cancer
Y145B.ATU14	299	299	0	C/C	99.0	691	chr17	7577119	7577120	C	snp	ts	0.00757575757576	65	1	0	0	0.950550440504	TP53	8	ENST00000269305	cGt/cAt	p.Arg273His/c.818G>A	393	P53	protein_coding	missense_variant	MED	1	rs28934576	0	-1.0	-1.0	1	0.001	0.000199681	1	2.471e-05	2.62816694116e-05	4.7460844803e-05	1	None	0	0	3.53	18.03	0.722319	pathogenic	Li-Fraumeni_syndrome_1|Thyroid_cancer
Y146B.A8P8B	25	25	0	C/C	72.0	691	chr17	7577119	7577120	C	snp	ts	0.00757575757576	65	1	0	0	0.950550440504	TP53	8	ENST00000269305	cGt/cAt	p.Arg273His/c.818G>A	393	P53	protein_coding	missense_variant	MED	1	rs28934576	0	-1.0	-1.0	1	0.001	0.000199681	1	2.471e-05	2.62816694116e-05	4.7460844803e-05	1	None	0	0	3.53	18.03	0.722319	pathogenic	Li-Fraumeni_syndrome_1|Thyroid_cancer
Y151B.ATU14	50	50	0	C/C	99.0	691	chr17	7577119	7577120	C	snp	ts	0.00757575757576	65	1	0	0	0.950550440504	TP53	8	ENST00000269305	cGt/cAt	p.Arg273His/c.818G>A	393	P53	protein_coding	missense_variant	MED	1	rs28934576	0	-1.0	-1.0	1	0.001	0.000199681	1	2.471e-05	2.62816694116e-05	4.7460844803e-05	1	None	0	0	3.53	18.03	0.722319	pathogenic	Li-Fraumeni_syndrome_1|Thyroid_cancer
Y159C.ATU14	38	38	0	C/C	99.0	691	chr17	7577119	7577120	C	snp	ts	0.00757575757576	65	1	0	0	0.950550440504	TP53	8	ENST00000269305	cGt/cAt	p.Arg273His/c.818G>A	393	P53	protein_coding	missense_variant	MED	1	rs28934576	0	-1.0	-1.0	1	0.001	0.000199681	1	2.471e-05	2.62816694116e-05	4.7460844803e-05	1	None	0	0	3.53	18.03	0.722319	pathogenic	Li-Fraumeni_syndrome_1|Thyroid_cancer
Y161C.ATU14	11	11	0	C/C	30.0	691	chr17	7577119	7577120	C	snp	ts	0.00757575757576	65	1	0	0	0.950550440504	TP53	8	ENST00000269305	cGt/cAt	p.Arg273His/c.818G>A	393	P53	protein_coding	missense_variant	MED	1	rs28934576	0	-1.0	-1.0	1	0.001	0.000199681	1	2.471e-05	2.62816694116e-05	4.7460844803e-05	1	None	0	0	3.53	18.03	0.722319	pathogenic	Li-Fraumeni_syndrome_1|Thyroid_cancer
Y165B.ATU14	126	124	2	C/C	99.0	691	chr17	7577119	7577120	C	snp	ts	0.00757575757576	65	1	0	0	0.950550440504	TP53	8	ENST00000269305	cGt/cAt	p.Arg273His/c.818G>A	393	P53	protein_coding	missense_variant	MED	1	rs28934576	0	-1.0	-1.0	1	0.001	0.000199681	1	2.471e-05	2.62816694116e-05	4.7460844803e-05	1	None	0	0	3.53	18.03	0.722319	pathogenic	Li-Fraumeni_syndrome_1|Thyroid_cancer
Y167B.A8P8B	46	46	0	C/C	99.0	691	chr17	7577119	7577120	C	snp	ts	0.00757575757576	65	1	0	0	0.950550440504	TP53	8	ENST00000269305	cGt/cAt	p.Arg273His/c.818G>A	393	P53	protein_coding	missense_variant	MED	1	rs28934576	0	-1.0	-1.0	1	0.001	0.000199681	1	2.471e-05	2.62816694116e-05	4.7460844803e-05	1	None	0	0	3.53	18.03	0.722319	pathogenic	Li-Fraumeni_syndrome_1|Thyroid_cancer
Y169C.ATU14	63	63	0	C/C	99.0	691	chr17	7577119	7577120	C	snp	ts	0.00757575757576	65	1	0	0	0.950550440504	TP53	8	ENST00000269305	cGt/cAt	p.Arg273His/c.818G>A	393	P53	protein_coding	missense_variant	MED	1	rs28934576	0	-1.0	-1.0	1	0.001	0.000199681	1	2.471e-05	2.62816694116e-05	4.7460844803e-05	1	None	0	0	3.53	18.03	0.722319	pathogenic	Li-Fraumeni_syndrome_1|Thyroid_cancer
ps4.AL9E5	115	115	0	C/C	99.0	691	chr17	7577119	7577120	C	snp	ts	0.00757575757576	65	1	0	0	0.950550440504	TP53	8	ENST00000269305	cGt/cAt	p.Arg273His/c.818G>A	393	P53	protein_coding	missense_variant	MED	1	rs28934576	0	-1.0	-1.0	1	0.001	0.000199681	1	2.471e-05	2.62816694116e-05	4.7460844803e-05	1	None	0	0	3.53	18.03	0.722319	pathogenic	Li-Fraumeni_syndrome_1|Thyroid_cancer
ps6.AUMV1	39	39	0	C/C	99.0	691	chr17	7577119	7577120	C	snp	ts	0.00757575757576	65	1	0	0	0.950550440504	TP53	8	ENST00000269305	cGt/cAt	p.Arg273His/c.818G>A	393	P53	protein_coding	missense_variant	MED	1	rs28934576	0	-1.0	-1.0	1	0.001	0.000199681	1	2.471e-05	2.62816694116e-05	4.7460844803e-05	1	None	0	0	3.53	18.03	0.722319	pathogenic	Li-Fraumeni_syndrome_1|Thyroid_cancer
sa14.AL9E5	150	150	0	C/C	99.0	691	chr17	7577119	7577120	C	snp	ts	0.00757575757576	65	1	0	0	0.950550440504	TP53	8	ENST00000269305	cGt/cAt	p.Arg273His/c.818G>A	393	P53	protein_coding	missense_variant	MED	1	rs28934576	0	-1.0	-1.0	1	0.001	0.000199681	1	2.471e-05	2.62816694116e-05	4.7460844803e-05	1	None	0	0	3.53	18.03	0.722319	pathogenic	Li-Fraumeni_syndrome_1|Thyroid_cancer
sa39.AL9E5	18	18	0	C/C	54.0	691	chr17	7577119	7577120	C	snp	ts	0.00757575757576	65	1	0	0	0.950550440504	TP53	8	ENST00000269305	cGt/cAt	p.Arg273His/c.818G>A	393	P53	protein_coding	missense_variant	MED	1	rs28934576	0	-1.0	-1.0	1	0.001	0.000199681	1	2.471e-05	2.62816694116e-05	4.7460844803e-05	1	None	0	0	3.53	18.03	0.722319	pathogenic	Li-Fraumeni_syndrome_1|Thyroid_cancer
sa40.ATR2U	97	96	1	C/C	99.0	691	chr17	7577119	7577120	C	snp	ts	0.00757575757576	65	1	0	0	0.950550440504	TP53	8	ENST00000269305	cGt/cAt	p.Arg273His/c.818G>A	393	P53	protein_coding	missense_variant	MED	1	rs28934576	0	-1.0	-1.0	1	0.001	0.000199681	1	2.471e-05	2.62816694116e-05	4.7460844803e-05	1	None	0	0	3.53	18.03	0.722319	pathogenic	Li-Fraumeni_syndrome_1|Thyroid_cancer
y103.AUMV1	215	215	0	C/C	99.0	691	chr17	7577119	7577120	C	snp	ts	0.00757575757576	65	1	0	0	0.950550440504	TP53	8	ENST00000269305	cGt/cAt	p.Arg273His/c.818G>A	393	P53	protein_coding	missense_variant	MED	1	rs28934576	0	-1.0	-1.0	1	0.001	0.000199681	1	2.471e-05	2.62816694116e-05	4.7460844803e-05	1	None	0	0	3.53	18.03	0.722319	pathogenic	Li-Fraumeni_syndrome_1|Thyroid_cancer
y104.ATR2U	24	24	0	C/C	72.0	691	chr17	7577119	7577120	C	snp	ts	0.00757575757576	65	1	0	0	0.950550440504	TP53	8	ENST00000269305	cGt/cAt	p.Arg273His/c.818G>A	393	P53	protein_coding	missense_variant	MED	1	rs28934576	0	-1.0	-1.0	1	0.001	0.000199681	1	2.471e-05	2.62816694116e-05	4.7460844803e-05	1	None	0	0	3.53	18.03	0.722319	pathogenic	Li-Fraumeni_syndrome_1|Thyroid_cancer
y109b.AUMV1	23	23	0	C/C	69.0	691	chr17	7577119	7577120	C	snp	ts	0.00757575757576	65	1	0	0	0.950550440504	TP53	8	ENST00000269305	cGt/cAt	p.Arg273His/c.818G>A	393	P53	protein_coding	missense_variant	MED	1	rs28934576	0	-1.0	-1.0	1	0.001	0.000199681	1	2.471e-05	2.62816694116e-05	4.7460844803e-05	1	None	0	0	3.53	18.03	0.722319	pathogenic	Li-Fraumeni_syndrome_1|Thyroid_cancer
y128b.AUMV1	131	130	1	C/C	99.0	691	chr17	7577119	7577120	C	snp	ts	0.00757575757576	65	1	0	0	0.950550440504	TP53	8	ENST00000269305	cGt/cAt	p.Arg273His/c.818G>A	393	P53	protein_coding	missense_variant	MED	1	rs28934576	0	-1.0	-1.0	1	0.001	0.000199681	1	2.471e-05	2.62816694116e-05	4.7460844803e-05	1	None	0	0	3.53	18.03	0.722319	pathogenic	Li-Fraumeni_syndrome_1|Thyroid_cancer
y132b.AUMV1	43	43	0	C/C	99.0	691	chr17	7577119	7577120	C	snp	ts	0.00757575757576	65	1	0	0	0.950550440504	TP53	8	ENST00000269305	cGt/cAt	p.Arg273His/c.818G>A	393	P53	protein_coding	missense_variant	MED	1	rs28934576	0	-1.0	-1.0	1	0.001	0.000199681	1	2.471e-05	2.62816694116e-05	4.7460844803e-05	1	None	0	0	3.53	18.03	0.722319	pathogenic	Li-Fraumeni_syndrome_1|Thyroid_cancer
y134b.AL9E5	175	175	0	C/C	99.0	691	chr17	7577119	7577120	C	snp	ts	0.00757575757576	65	1	0	0	0.950550440504	TP53	8	ENST00000269305	cGt/cAt	p.Arg273His/c.818G>A	393	P53	protein_coding	missense_variant	MED	1	rs28934576	0	-1.0	-1.0	1	0.001	0.000199681	1	2.471e-05	2.62816694116e-05	4.7460844803e-05	1	None	0	0	3.53	18.03	0.722319	pathogenic	Li-Fraumeni_syndrome_1|Thyroid_cancer
y144c.AUMV1	73	73	0	C/C	99.0	691	chr17	7577119	7577120	C	snp	ts	0.00757575757576	65	1	0	0	0.950550440504	TP53	8	ENST00000269305	cGt/cAt	p.Arg273His/c.818G>A	393	P53	protein_coding	missense_variant	MED	1	rs28934576	0	-1.0	-1.0	1	0.001	0.000199681	1	2.471e-05	2.62816694116e-05	4.7460844803e-05	1	None	0	0	3.53	18.03	0.722319	pathogenic	Li-Fraumeni_syndrome_1|Thyroid_cancer
y147c.AUMV1	200	200	0	C/C	99.0	691	chr17	7577119	7577120	C	snp	ts	0.00757575757576	65	1	0	0	0.950550440504	TP53	8	ENST00000269305	cGt/cAt	p.Arg273His/c.818G>A	393	P53	protein_coding	missense_variant	MED	1	rs28934576	0	-1.0	-1.0	1	0.001	0.000199681	1	2.471e-05	2.62816694116e-05	4.7460844803e-05	1	None	0	0	3.53	18.03	0.722319	pathogenic	Li-Fraumeni_syndrome_1|Thyroid_cancer
y162c.ATR2U	48	48	0	C/C	99.0	691	chr17	7577119	7577120	C	snp	ts	0.00757575757576	65	1	0	0	0.950550440504	TP53	8	ENST00000269305	cGt/cAt	p.Arg273His/c.818G>A	393	P53	protein_coding	missense_variant	MED	1	rs28934576	0	-1.0	-1.0	1	0.001	0.000199681	1	2.471e-05	2.62816694116e-05	4.7460844803e-05	1	None	0	0	3.53	18.03	0.722319	pathogenic	Li-Fraumeni_syndrome_1|Thyroid_cancer
y179f.AL9E5	165	165	0	C/C	99.0	691	chr17	7577119	7577120	C	snp	ts	0.00757575757576	65	1	0	0	0.950550440504	TP53	8	ENST00000269305	cGt/cAt	p.Arg273His/c.818G>A	393	P53	protein_coding	missense_variant	MED	1	rs28934576	0	-1.0	-1.0	1	0.001	0.000199681	1	2.471e-05	2.62816694116e-05	4.7460844803e-05	1	None	0	0	3.53	18.03	0.722319	pathogenic	Li-Fraumeni_syndrome_1|Thyroid_cancer
y183b.AUMV1	119	119	0	C/C	99.0	691	chr17	7577119	7577120	C	snp	ts	0.00757575757576	65	1	0	0	0.950550440504	TP53	8	ENST00000269305	cGt/cAt	p.Arg273His/c.818G>A	393	P53	protein_coding	missense_variant	MED	1	rs28934576	0	-1.0	-1.0	1	0.001	0.000199681	1	2.471e-05	2.62816694116e-05	4.7460844803e-05	1	None	0	0	3.53	18.03	0.722319	pathogenic	Li-Fraumeni_syndrome_1|Thyroid_cancer
y188b.AUMV1	83	82	1	C/C	99.0	691	chr17	7577119	7577120	C	snp	ts	0.00757575757576	65	1	0	0	0.950550440504	TP53	8	ENST00000269305	cGt/cAt	p.Arg273His/c.818G>A	393	P53	protein_coding	missense_variant	MED	1	rs28934576	0	-1.0	-1.0	1	0.001	0.000199681	1	2.471e-05	2.62816694116e-05	4.7460844803e-05	1	None	0	0	3.53	18.03	0.722319	pathogenic	Li-Fraumeni_syndrome_1|Thyroid_cancer
y199b.AL9E5	189	188	1	C/C	99.0	691	chr17	7577119	7577120	C	snp	ts	0.00757575757576	65	1	0	0	0.950550440504	TP53	8	ENST00000269305	cGt/cAt	p.Arg273His/c.818G>A	393	P53	protein_coding	missense_variant	MED	1	rs28934576	0	-1.0	-1.0	1	0.001	0.000199681	1	2.471e-05	2.62816694116e-05	4.7460844803e-05	1	None	0	0	3.53	18.03	0.722319	pathogenic	Li-Fraumeni_syndrome_1|Thyroid_cancer
y3.AUMV1	64	64	0	C/C	99.0	691	chr17	7577119	7577120	C	snp	ts	0.00757575757576	65	1	0	0	0.950550440504	TP53	8	ENST00000269305	cGt/cAt	p.Arg273His/c.818G>A	393	P53	protein_coding	missense_variant	MED	1	rs28934576	0	-1.0	-1.0	1	0.001	0.000199681	1	2.471e-05	2.62816694116e-05	4.7460844803e-05	1	None	0	0	3.53	18.03	0.722319	pathogenic	Li-Fraumeni_syndrome_1|Thyroid_cancer
y68.ATR2U	148	147	1	C/C	99.0	691	chr17	7577119	7577120	C	snp	ts	0.00757575757576	65	1	0	0	0.950550440504	TP53	8	ENST00000269305	cGt/cAt	p.Arg273His/c.818G>A	393	P53	protein_coding	missense_variant	MED	1	rs28934576	0	-1.0	-1.0	1	0.001	0.000199681	1	2.471e-05	2.62816694116e-05	4.7460844803e-05	1	None	0	0	3.53	18.03	0.722319	pathogenic	Li-Fraumeni_syndrome_1|Thyroid_cancer
y77.AL9E5	131	130	1	C/C	99.0	691	chr17	7577119	7577120	C	snp	ts	0.00757575757576	65	1	0	0	0.950550440504	TP53	8	ENST00000269305	cGt/cAt	p.Arg273His/c.818G>A	393	P53	protein_coding	missense_variant	MED	1	rs28934576	0	-1.0	-1.0	1	0.001	0.000199681	1	2.471e-05	2.62816694116e-05	4.7460844803e-05	1	None	0	0	3.53	18.03	0.722319	pathogenic	Li-Fraumeni_syndrome_1|Thyroid_cancer
y88.AUMV1	20	20	0	C/C	60.0	691	chr17	7577119	7577120	C	snp	ts	0.00757575757576	65	1	0	0	0.950550440504	TP53	8	ENST00000269305	cGt/cAt	p.Arg273His/c.818G>A	393	P53	protein_coding	missense_variant	MED	1	rs28934576	0	-1.0	-1.0	1	0.001	0.000199681	1	2.471e-05	2.62816694116e-05	4.7460844803e-05	1	None	0	0	3.53	18.03	0.722319	pathogenic	Li-Fraumeni_syndrome_1|Thyroid_cancer
1.ATR2U	194	34	160	C/T	99.0	691	chr17	7577119	7577120	C	snp	ts	0.00757575757576	65	1	0	0	0.950550440504	TP53	8	ENST00000269305	cGt/cAt	p.Arg273His/c.818G>A	393	P53	protein_coding	missense_variant	MED	1	rs28934576	0	-1.0	-1.0	1	0.001	0.000199681	1	2.471e-05	2.62816694116e-05	4.7460844803e-05	1	None	0	0	3.53	18.03	0.722319	pathogenic	Li-Fraumeni_syndrome_1|Thyroid_cancer
1.ATR2U	213	213	0	C/C	99.0	692	chr17	7577123	7577124	C	snp	ts	0.00757575757576	65	1	0	0	0.950550440504	TP53	8	ENST00000269305	Gtg/Atg	p.Val272Met/c.814G>A	393	P53	protein_coding	missense_variant	MED	1	rs121912657	0	-1.0	-1.0	0	-1.0	-1.0	1	3.295e-05	2.68288320515e-05	3.22861847415e-05	1	None	0	0	4.32	22.7	0.722319	uncertain	Hereditary_cancer-predisposing_syndrome
10.ATU14	76	76	0	C/C	99.0	692	chr17	7577123	7577124	C	snp	ts	0.00757575757576	65	1	0	0	0.950550440504	TP53	8	ENST00000269305	Gtg/Atg	p.Val272Met/c.814G>A	393	P53	protein_coding	missense_variant	MED	1	rs121912657	0	-1.0	-1.0	0	-1.0	-1.0	1	3.295e-05	2.68288320515e-05	3.22861847415e-05	1	None	0	0	4.32	22.7	0.722319	uncertain	Hereditary_cancer-predisposing_syndrome
17.AUMV1	187	186	1	C/C	99.0	692	chr17	7577123	7577124	C	snp	ts	0.00757575757576	65	1	0	0	0.950550440504	TP53	8	ENST00000269305	Gtg/Atg	p.Val272Met/c.814G>A	393	P53	protein_coding	missense_variant	MED	1	rs121912657	0	-1.0	-1.0	0	-1.0	-1.0	1	3.295e-05	2.68288320515e-05	3.22861847415e-05	1	None	0	0	4.32	22.7	0.722319	uncertain	Hereditary_cancer-predisposing_syndrome
2.ATR2U	305	305	0	C/C	99.0	692	chr17	7577123	7577124	C	snp	ts	0.00757575757576	65	1	0	0	0.950550440504	TP53	8	ENST00000269305	Gtg/Atg	p.Val272Met/c.814G>A	393	P53	protein_coding	missense_variant	MED	1	rs121912657	0	-1.0	-1.0	0	-1.0	-1.0	1	3.295e-05	2.68288320515e-05	3.22861847415e-05	1	None	0	0	4.32	22.7	0.722319	uncertain	Hereditary_cancer-predisposing_syndrome
21.AL9E5	10	10	0	C/C	30.0	692	chr17	7577123	7577124	C	snp	ts	0.00757575757576	65	1	0	0	0.950550440504	TP53	8	ENST00000269305	Gtg/Atg	p.Val272Met/c.814G>A	393	P53	protein_coding	missense_variant	MED	1	rs121912657	0	-1.0	-1.0	0	-1.0	-1.0	1	3.295e-05	2.68288320515e-05	3.22861847415e-05	1	None	0	0	4.32	22.7	0.722319	uncertain	Hereditary_cancer-predisposing_syndrome
22.AUMV1	195	194	1	C/C	99.0	692	chr17	7577123	7577124	C	snp	ts	0.00757575757576	65	1	0	0	0.950550440504	TP53	8	ENST00000269305	Gtg/Atg	p.Val272Met/c.814G>A	393	P53	protein_coding	missense_variant	MED	1	rs121912657	0	-1.0	-1.0	0	-1.0	-1.0	1	3.295e-05	2.68288320515e-05	3.22861847415e-05	1	None	0	0	4.32	22.7	0.722319	uncertain	Hereditary_cancer-predisposing_syndrome
26.ATU14	110	110	0	C/C	99.0	692	chr17	7577123	7577124	C	snp	ts	0.00757575757576	65	1	0	0	0.950550440504	TP53	8	ENST00000269305	Gtg/Atg	p.Val272Met/c.814G>A	393	P53	protein_coding	missense_variant	MED	1	rs121912657	0	-1.0	-1.0	0	-1.0	-1.0	1	3.295e-05	2.68288320515e-05	3.22861847415e-05	1	None	0	0	4.32	22.7	0.722319	uncertain	Hereditary_cancer-predisposing_syndrome
31.ATU14	200	200	0	C/C	99.0	692	chr17	7577123	7577124	C	snp	ts	0.00757575757576	65	1	0	0	0.950550440504	TP53	8	ENST00000269305	Gtg/Atg	p.Val272Met/c.814G>A	393	P53	protein_coding	missense_variant	MED	1	rs121912657	0	-1.0	-1.0	0	-1.0	-1.0	1	3.295e-05	2.68288320515e-05	3.22861847415e-05	1	None	0	0	4.32	22.7	0.722319	uncertain	Hereditary_cancer-predisposing_syndrome
35.ATU14	33	33	0	C/C	90.0	692	chr17	7577123	7577124	C	snp	ts	0.00757575757576	65	1	0	0	0.950550440504	TP53	8	ENST00000269305	Gtg/Atg	p.Val272Met/c.814G>A	393	P53	protein_coding	missense_variant	MED	1	rs121912657	0	-1.0	-1.0	0	-1.0	-1.0	1	3.295e-05	2.68288320515e-05	3.22861847415e-05	1	None	0	0	4.32	22.7	0.722319	uncertain	Hereditary_cancer-predisposing_syndrome
37.ATU14	87	87	0	C/C	99.0	692	chr17	7577123	7577124	C	snp	ts	0.00757575757576	65	1	0	0	0.950550440504	TP53	8	ENST00000269305	Gtg/Atg	p.Val272Met/c.814G>A	393	P53	protein_coding	missense_variant	MED	1	rs121912657	0	-1.0	-1.0	0	-1.0	-1.0	1	3.295e-05	2.68288320515e-05	3.22861847415e-05	1	None	0	0	4.32	22.7	0.722319	uncertain	Hereditary_cancer-predisposing_syndrome
45.ATU14	87	87	0	C/C	99.0	692	chr17	7577123	7577124	C	snp	ts	0.00757575757576	65	1	0	0	0.950550440504	TP53	8	ENST00000269305	Gtg/Atg	p.Val272Met/c.814G>A	393	P53	protein_coding	missense_variant	MED	1	rs121912657	0	-1.0	-1.0	0	-1.0	-1.0	1	3.295e-05	2.68288320515e-05	3.22861847415e-05	1	None	0	0	4.32	22.7	0.722319	uncertain	Hereditary_cancer-predisposing_syndrome
5.ATR2U	226	226	0	C/C	99.0	692	chr17	7577123	7577124	C	snp	ts	0.00757575757576	65	1	0	0	0.950550440504	TP53	8	ENST00000269305	Gtg/Atg	p.Val272Met/c.814G>A	393	P53	protein_coding	missense_variant	MED	1	rs121912657	0	-1.0	-1.0	0	-1.0	-1.0	1	3.295e-05	2.68288320515e-05	3.22861847415e-05	1	None	0	0	4.32	22.7	0.722319	uncertain	Hereditary_cancer-predisposing_syndrome
63n.AUMV1	79	79	0	C/C	99.0	692	chr17	7577123	7577124	C	snp	ts	0.00757575757576	65	1	0	0	0.950550440504	TP53	8	ENST00000269305	Gtg/Atg	p.Val272Met/c.814G>A	393	P53	protein_coding	missense_variant	MED	1	rs121912657	0	-1.0	-1.0	0	-1.0	-1.0	1	3.295e-05	2.68288320515e-05	3.22861847415e-05	1	None	0	0	4.32	22.7	0.722319	uncertain	Hereditary_cancer-predisposing_syndrome
7.A8P8B	158	157	1	C/C	99.0	692	chr17	7577123	7577124	C	snp	ts	0.00757575757576	65	1	0	0	0.950550440504	TP53	8	ENST00000269305	Gtg/Atg	p.Val272Met/c.814G>A	393	P53	protein_coding	missense_variant	MED	1	rs121912657	0	-1.0	-1.0	0	-1.0	-1.0	1	3.295e-05	2.68288320515e-05	3.22861847415e-05	1	None	0	0	4.32	22.7	0.722319	uncertain	Hereditary_cancer-predisposing_syndrome
72.ATR2U	249	249	0	C/C	99.0	692	chr17	7577123	7577124	C	snp	ts	0.00757575757576	65	1	0	0	0.950550440504	TP53	8	ENST00000269305	Gtg/Atg	p.Val272Met/c.814G>A	393	P53	protein_coding	missense_variant	MED	1	rs121912657	0	-1.0	-1.0	0	-1.0	-1.0	1	3.295e-05	2.68288320515e-05	3.22861847415e-05	1	None	0	0	4.32	22.7	0.722319	uncertain	Hereditary_cancer-predisposing_syndrome
82.ATR2U	119	119	0	C/C	99.0	692	chr17	7577123	7577124	C	snp	ts	0.00757575757576	65	1	0	0	0.950550440504	TP53	8	ENST00000269305	Gtg/Atg	p.Val272Met/c.814G>A	393	P53	protein_coding	missense_variant	MED	1	rs121912657	0	-1.0	-1.0	0	-1.0	-1.0	1	3.295e-05	2.68288320515e-05	3.22861847415e-05	1	None	0	0	4.32	22.7	0.722319	uncertain	Hereditary_cancer-predisposing_syndrome
84.ATR2U	193	193	0	C/C	99.0	692	chr17	7577123	7577124	C	snp	ts	0.00757575757576	65	1	0	0	0.950550440504	TP53	8	ENST00000269305	Gtg/Atg	p.Val272Met/c.814G>A	393	P53	protein_coding	missense_variant	MED	1	rs121912657	0	-1.0	-1.0	0	-1.0	-1.0	1	3.295e-05	2.68288320515e-05	3.22861847415e-05	1	None	0	0	4.32	22.7	0.722319	uncertain	Hereditary_cancer-predisposing_syndrome
91n.AUMV1	55	55	0	C/C	99.0	692	chr17	7577123	7577124	C	snp	ts	0.00757575757576	65	1	0	0	0.950550440504	TP53	8	ENST00000269305	Gtg/Atg	p.Val272Met/c.814G>A	393	P53	protein_coding	missense_variant	MED	1	rs121912657	0	-1.0	-1.0	0	-1.0	-1.0	1	3.295e-05	2.68288320515e-05	3.22861847415e-05	1	None	0	0	4.32	22.7	0.722319	uncertain	Hereditary_cancer-predisposing_syndrome
BS2.ATU14	38	38	0	C/C	99.0	692	chr17	7577123	7577124	C	snp	ts	0.00757575757576	65	1	0	0	0.950550440504	TP53	8	ENST00000269305	Gtg/Atg	p.Val272Met/c.814G>A	393	P53	protein_coding	missense_variant	MED	1	rs121912657	0	-1.0	-1.0	0	-1.0	-1.0	1	3.295e-05	2.68288320515e-05	3.22861847415e-05	1	None	0	0	4.32	22.7	0.722319	uncertain	Hereditary_cancer-predisposing_syndrome
PS1.A8P8B	92	91	1	C/C	99.0	692	chr17	7577123	7577124	C	snp	ts	0.00757575757576	65	1	0	0	0.950550440504	TP53	8	ENST00000269305	Gtg/Atg	p.Val272Met/c.814G>A	393	P53	protein_coding	missense_variant	MED	1	rs121912657	0	-1.0	-1.0	0	-1.0	-1.0	1	3.295e-05	2.68288320515e-05	3.22861847415e-05	1	None	0	0	4.32	22.7	0.722319	uncertain	Hereditary_cancer-predisposing_syndrome
PS2.A8P8B	89	89	0	C/C	99.0	692	chr17	7577123	7577124	C	snp	ts	0.00757575757576	65	1	0	0	0.950550440504	TP53	8	ENST00000269305	Gtg/Atg	p.Val272Met/c.814G>A	393	P53	protein_coding	missense_variant	MED	1	rs121912657	0	-1.0	-1.0	0	-1.0	-1.0	1	3.295e-05	2.68288320515e-05	3.22861847415e-05	1	None	0	0	4.32	22.7	0.722319	uncertain	Hereditary_cancer-predisposing_syndrome
SA36.A8P8B	32	32	0	C/C	96.0	692	chr17	7577123	7577124	C	snp	ts	0.00757575757576	65	1	0	0	0.950550440504	TP53	8	ENST00000269305	Gtg/Atg	p.Val272Met/c.814G>A	393	P53	protein_coding	missense_variant	MED	1	rs121912657	0	-1.0	-1.0	0	-1.0	-1.0	1	3.295e-05	2.68288320515e-05	3.22861847415e-05	1	None	0	0	4.32	22.7	0.722319	uncertain	Hereditary_cancer-predisposing_syndrome
SA38.ATU14	12	12	0	C/C	36.0	692	chr17	7577123	7577124	C	snp	ts	0.00757575757576	65	1	0	0	0.950550440504	TP53	8	ENST00000269305	Gtg/Atg	p.Val272Met/c.814G>A	393	P53	protein_coding	missense_variant	MED	1	rs121912657	0	-1.0	-1.0	0	-1.0	-1.0	1	3.295e-05	2.68288320515e-05	3.22861847415e-05	1	None	0	0	4.32	22.7	0.722319	uncertain	Hereditary_cancer-predisposing_syndrome
SA41.ATU14	162	162	0	C/C	99.0	692	chr17	7577123	7577124	C	snp	ts	0.00757575757576	65	1	0	0	0.950550440504	TP53	8	ENST00000269305	Gtg/Atg	p.Val272Met/c.814G>A	393	P53	protein_coding	missense_variant	MED	1	rs121912657	0	-1.0	-1.0	0	-1.0	-1.0	1	3.295e-05	2.68288320515e-05	3.22861847415e-05	1	None	0	0	4.32	22.7	0.722319	uncertain	Hereditary_cancer-predisposing_syndrome
Y102.ATU14	22	22	0	C/C	63.0	692	chr17	7577123	7577124	C	snp	ts	0.00757575757576	65	1	0	0	0.950550440504	TP53	8	ENST00000269305	Gtg/Atg	p.Val272Met/c.814G>A	393	P53	protein_coding	missense_variant	MED	1	rs121912657	0	-1.0	-1.0	0	-1.0	-1.0	1	3.295e-05	2.68288320515e-05	3.22861847415e-05	1	None	0	0	4.32	22.7	0.722319	uncertain	Hereditary_cancer-predisposing_syndrome
Y105.ATU14	63	63	0	C/C	99.0	692	chr17	7577123	7577124	C	snp	ts	0.00757575757576	65	1	0	0	0.950550440504	TP53	8	ENST00000269305	Gtg/Atg	p.Val272Met/c.814G>A	393	P53	protein_coding	missense_variant	MED	1	rs121912657	0	-1.0	-1.0	0	-1.0	-1.0	1	3.295e-05	2.68288320515e-05	3.22861847415e-05	1	None	0	0	4.32	22.7	0.722319	uncertain	Hereditary_cancer-predisposing_syndrome
Y115B.ATU14	172	172	0	C/C	99.0	692	chr17	7577123	7577124	C	snp	ts	0.00757575757576	65	1	0	0	0.950550440504	TP53	8	ENST00000269305	Gtg/Atg	p.Val272Met/c.814G>A	393	P53	protein_coding	missense_variant	MED	1	rs121912657	0	-1.0	-1.0	0	-1.0	-1.0	1	3.295e-05	2.68288320515e-05	3.22861847415e-05	1	None	0	0	4.32	22.7	0.722319	uncertain	Hereditary_cancer-predisposing_syndrome
Y123B.ATU14	225	225	0	C/C	99.0	692	chr17	7577123	7577124	C	snp	ts	0.00757575757576	65	1	0	0	0.950550440504	TP53	8	ENST00000269305	Gtg/Atg	p.Val272Met/c.814G>A	393	P53	protein_coding	missense_variant	MED	1	rs121912657	0	-1.0	-1.0	0	-1.0	-1.0	1	3.295e-05	2.68288320515e-05	3.22861847415e-05	1	None	0	0	4.32	22.7	0.722319	uncertain	Hereditary_cancer-predisposing_syndrome
Y135.ATU14	299	299	0	C/C	99.0	692	chr17	7577123	7577124	C	snp	ts	0.00757575757576	65	1	0	0	0.950550440504	TP53	8	ENST00000269305	Gtg/Atg	p.Val272Met/c.814G>A	393	P53	protein_coding	missense_variant	MED	1	rs121912657	0	-1.0	-1.0	0	-1.0	-1.0	1	3.295e-05	2.68288320515e-05	3.22861847415e-05	1	None	0	0	4.32	22.7	0.722319	uncertain	Hereditary_cancer-predisposing_syndrome
Y137B.ATU14	96	96	0	C/C	99.0	692	chr17	7577123	7577124	C	snp	ts	0.00757575757576	65	1	0	0	0.950550440504	TP53	8	ENST00000269305	Gtg/Atg	p.Val272Met/c.814G>A	393	P53	protein_coding	missense_variant	MED	1	rs121912657	0	-1.0	-1.0	0	-1.0	-1.0	1	3.295e-05	2.68288320515e-05	3.22861847415e-05	1	None	0	0	4.32	22.7	0.722319	uncertain	Hereditary_cancer-predisposing_syndrome
Y143C.ATU14	68	67	1	C/C	99.0	692	chr17	7577123	7577124	C	snp	ts	0.00757575757576	65	1	0	0	0.950550440504	TP53	8	ENST00000269305	Gtg/Atg	p.Val272Met/c.814G>A	393	P53	protein_coding	missense_variant	MED	1	rs121912657	0	-1.0	-1.0	0	-1.0	-1.0	1	3.295e-05	2.68288320515e-05	3.22861847415e-05	1	None	0	0	4.32	22.7	0.722319	uncertain	Hereditary_cancer-predisposing_syndrome
Y145B.ATU14	328	328	0	C/C	99.0	692	chr17	7577123	7577124	C	snp	ts	0.00757575757576	65	1	0	0	0.950550440504	TP53	8	ENST00000269305	Gtg/Atg	p.Val272Met/c.814G>A	393	P53	protein_coding	missense_variant	MED	1	rs121912657	0	-1.0	-1.0	0	-1.0	-1.0	1	3.295e-05	2.68288320515e-05	3.22861847415e-05	1	None	0	0	4.32	22.7	0.722319	uncertain	Hereditary_cancer-predisposing_syndrome
Y146B.A8P8B	25	25	0	C/C	75.0	692	chr17	7577123	7577124	C	snp	ts	0.00757575757576	65	1	0	0	0.950550440504	TP53	8	ENST00000269305	Gtg/Atg	p.Val272Met/c.814G>A	393	P53	protein_coding	missense_variant	MED	1	rs121912657	0	-1.0	-1.0	0	-1.0	-1.0	1	3.295e-05	2.68288320515e-05	3.22861847415e-05	1	None	0	0	4.32	22.7	0.722319	uncertain	Hereditary_cancer-predisposing_syndrome
Y148C.A8P8B	8	8	0	C/C	24.0	692	chr17	7577123	7577124	C	snp	ts	0.00757575757576	65	1	0	0	0.950550440504	TP53	8	ENST00000269305	Gtg/Atg	p.Val272Met/c.814G>A	393	P53	protein_coding	missense_variant	MED	1	rs121912657	0	-1.0	-1.0	0	-1.0	-1.0	1	3.295e-05	2.68288320515e-05	3.22861847415e-05	1	None	0	0	4.32	22.7	0.722319	uncertain	Hereditary_cancer-predisposing_syndrome
Y151B.ATU14	58	58	0	C/C	99.0	692	chr17	7577123	7577124	C	snp	ts	0.00757575757576	65	1	0	0	0.950550440504	TP53	8	ENST00000269305	Gtg/Atg	p.Val272Met/c.814G>A	393	P53	protein_coding	missense_variant	MED	1	rs121912657	0	-1.0	-1.0	0	-1.0	-1.0	1	3.295e-05	2.68288320515e-05	3.22861847415e-05	1	None	0	0	4.32	22.7	0.722319	uncertain	Hereditary_cancer-predisposing_syndrome
Y159C.ATU14	49	49	0	C/C	99.0	692	chr17	7577123	7577124	C	snp	ts	0.00757575757576	65	1	0	0	0.950550440504	TP53	8	ENST00000269305	Gtg/Atg	p.Val272Met/c.814G>A	393	P53	protein_coding	missense_variant	MED	1	rs121912657	0	-1.0	-1.0	0	-1.0	-1.0	1	3.295e-05	2.68288320515e-05	3.22861847415e-05	1	None	0	0	4.32	22.7	0.722319	uncertain	Hereditary_cancer-predisposing_syndrome
Y161C.ATU14	12	12	0	C/C	33.0	692	chr17	7577123	7577124	C	snp	ts	0.00757575757576	65	1	0	0	0.950550440504	TP53	8	ENST00000269305	Gtg/Atg	p.Val272Met/c.814G>A	393	P53	protein_coding	missense_variant	MED	1	rs121912657	0	-1.0	-1.0	0	-1.0	-1.0	1	3.295e-05	2.68288320515e-05	3.22861847415e-05	1	None	0	0	4.32	22.7	0.722319	uncertain	Hereditary_cancer-predisposing_syndrome
Y165B.ATU14	133	133	0	C/C	99.0	692	chr17	7577123	7577124	C	snp	ts	0.00757575757576	65	1	0	0	0.950550440504	TP53	8	ENST00000269305	Gtg/Atg	p.Val272Met/c.814G>A	393	P53	protein_coding	missense_variant	MED	1	rs121912657	0	-1.0	-1.0	0	-1.0	-1.0	1	3.295e-05	2.68288320515e-05	3.22861847415e-05	1	None	0	0	4.32	22.7	0.722319	uncertain	Hereditary_cancer-predisposing_syndrome
Y167B.A8P8B	48	48	0	C/C	99.0	692	chr17	7577123	7577124	C	snp	ts	0.00757575757576	65	1	0	0	0.950550440504	TP53	8	ENST00000269305	Gtg/Atg	p.Val272Met/c.814G>A	393	P53	protein_coding	missense_variant	MED	1	rs121912657	0	-1.0	-1.0	0	-1.0	-1.0	1	3.295e-05	2.68288320515e-05	3.22861847415e-05	1	None	0	0	4.32	22.7	0.722319	uncertain	Hereditary_cancer-predisposing_syndrome
Y169C.ATU14	64	64	0	C/C	99.0	692	chr17	7577123	7577124	C	snp	ts	0.00757575757576	65	1	0	0	0.950550440504	TP53	8	ENST00000269305	Gtg/Atg	p.Val272Met/c.814G>A	393	P53	protein_coding	missense_variant	MED	1	rs121912657	0	-1.0	-1.0	0	-1.0	-1.0	1	3.295e-05	2.68288320515e-05	3.22861847415e-05	1	None	0	0	4.32	22.7	0.722319	uncertain	Hereditary_cancer-predisposing_syndrome
ps4.AL9E5	125	125	0	C/C	99.0	692	chr17	7577123	7577124	C	snp	ts	0.00757575757576	65	1	0	0	0.950550440504	TP53	8	ENST00000269305	Gtg/Atg	p.Val272Met/c.814G>A	393	P53	protein_coding	missense_variant	MED	1	rs121912657	0	-1.0	-1.0	0	-1.0	-1.0	1	3.295e-05	2.68288320515e-05	3.22861847415e-05	1	None	0	0	4.32	22.7	0.722319	uncertain	Hereditary_cancer-predisposing_syndrome
ps6.AUMV1	50	50	0	C/C	99.0	692	chr17	7577123	7577124	C	snp	ts	0.00757575757576	65	1	0	0	0.950550440504	TP53	8	ENST00000269305	Gtg/Atg	p.Val272Met/c.814G>A	393	P53	protein_coding	missense_variant	MED	1	rs121912657	0	-1.0	-1.0	0	-1.0	-1.0	1	3.295e-05	2.68288320515e-05	3.22861847415e-05	1	None	0	0	4.32	22.7	0.722319	uncertain	Hereditary_cancer-predisposing_syndrome
sa14.AL9E5	171	170	1	C/C	99.0	692	chr17	7577123	7577124	C	snp	ts	0.00757575757576	65	1	0	0	0.950550440504	TP53	8	ENST00000269305	Gtg/Atg	p.Val272Met/c.814G>A	393	P53	protein_coding	missense_variant	MED	1	rs121912657	0	-1.0	-1.0	0	-1.0	-1.0	1	3.295e-05	2.68288320515e-05	3.22861847415e-05	1	None	0	0	4.32	22.7	0.722319	uncertain	Hereditary_cancer-predisposing_syndrome
sa39.AL9E5	25	25	0	C/C	74.0	692	chr17	7577123	7577124	C	snp	ts	0.00757575757576	65	1	0	0	0.950550440504	TP53	8	ENST00000269305	Gtg/Atg	p.Val272Met/c.814G>A	393	P53	protein_coding	missense_variant	MED	1	rs121912657	0	-1.0	-1.0	0	-1.0	-1.0	1	3.295e-05	2.68288320515e-05	3.22861847415e-05	1	None	0	0	4.32	22.7	0.722319	uncertain	Hereditary_cancer-predisposing_syndrome
sa40.ATR2U	120	120	0	C/C	99.0	692	chr17	7577123	7577124	C	snp	ts	0.00757575757576	65	1	0	0	0.950550440504	TP53	8	ENST00000269305	Gtg/Atg	p.Val272Met/c.814G>A	393	P53	protein_coding	missense_variant	MED	1	rs121912657	0	-1.0	-1.0	0	-1.0	-1.0	1	3.295e-05	2.68288320515e-05	3.22861847415e-05	1	None	0	0	4.32	22.7	0.722319	uncertain	Hereditary_cancer-predisposing_syndrome
y103.AUMV1	241	241	0	C/C	99.0	692	chr17	7577123	7577124	C	snp	ts	0.00757575757576	65	1	0	0	0.950550440504	TP53	8	ENST00000269305	Gtg/Atg	p.Val272Met/c.814G>A	393	P53	protein_coding	missense_variant	MED	1	rs121912657	0	-1.0	-1.0	0	-1.0	-1.0	1	3.295e-05	2.68288320515e-05	3.22861847415e-05	1	None	0	0	4.32	22.7	0.722319	uncertain	Hereditary_cancer-predisposing_syndrome
y104.ATR2U	28	28	0	C/C	78.0	692	chr17	7577123	7577124	C	snp	ts	0.00757575757576	65	1	0	0	0.950550440504	TP53	8	ENST00000269305	Gtg/Atg	p.Val272Met/c.814G>A	393	P53	protein_coding	missense_variant	MED	1	rs121912657	0	-1.0	-1.0	0	-1.0	-1.0	1	3.295e-05	2.68288320515e-05	3.22861847415e-05	1	None	0	0	4.32	22.7	0.722319	uncertain	Hereditary_cancer-predisposing_syndrome
y109b.AUMV1	24	24	0	C/C	72.0	692	chr17	7577123	7577124	C	snp	ts	0.00757575757576	65	1	0	0	0.950550440504	TP53	8	ENST00000269305	Gtg/Atg	p.Val272Met/c.814G>A	393	P53	protein_coding	missense_variant	MED	1	rs121912657	0	-1.0	-1.0	0	-1.0	-1.0	1	3.295e-05	2.68288320515e-05	3.22861847415e-05	1	None	0	0	4.32	22.7	0.722319	uncertain	Hereditary_cancer-predisposing_syndrome
y110b.AUMV1	8	8	0	C/C	21.0	692	chr17	7577123	7577124	C	snp	ts	0.00757575757576	65	1	0	0	0.950550440504	TP53	8	ENST00000269305	Gtg/Atg	p.Val272Met/c.814G>A	393	P53	protein_coding	missense_variant	MED	1	rs121912657	0	-1.0	-1.0	0	-1.0	-1.0	1	3.295e-05	2.68288320515e-05	3.22861847415e-05	1	None	0	0	4.32	22.7	0.722319	uncertain	Hereditary_cancer-predisposing_syndrome
y128b.AUMV1	142	140	2	C/C	99.0	692	chr17	7577123	7577124	C	snp	ts	0.00757575757576	65	1	0	0	0.950550440504	TP53	8	ENST00000269305	Gtg/Atg	p.Val272Met/c.814G>A	393	P53	protein_coding	missense_variant	MED	1	rs121912657	0	-1.0	-1.0	0	-1.0	-1.0	1	3.295e-05	2.68288320515e-05	3.22861847415e-05	1	None	0	0	4.32	22.7	0.722319	uncertain	Hereditary_cancer-predisposing_syndrome
y132b.AUMV1	49	49	0	C/C	99.0	692	chr17	7577123	7577124	C	snp	ts	0.00757575757576	65	1	0	0	0.950550440504	TP53	8	ENST00000269305	Gtg/Atg	p.Val272Met/c.814G>A	393	P53	protein_coding	missense_variant	MED	1	rs121912657	0	-1.0	-1.0	0	-1.0	-1.0	1	3.295e-05	2.68288320515e-05	3.22861847415e-05	1	None	0	0	4.32	22.7	0.722319	uncertain	Hereditary_cancer-predisposing_syndrome
y134b.AL9E5	185	185	0	C/C	99.0	692	chr17	7577123	7577124	C	snp	ts	0.00757575757576	65	1	0	0	0.950550440504	TP53	8	ENST00000269305	Gtg/Atg	p.Val272Met/c.814G>A	393	P53	protein_coding	missense_variant	MED	1	rs121912657	0	-1.0	-1.0	0	-1.0	-1.0	1	3.295e-05	2.68288320515e-05	3.22861847415e-05	1	None	0	0	4.32	22.7	0.722319	uncertain	Hereditary_cancer-predisposing_syndrome
y144c.AUMV1	83	83	0	C/C	99.0	692	chr17	7577123	7577124	C	snp	ts	0.00757575757576	65	1	0	0	0.950550440504	TP53	8	ENST00000269305	Gtg/Atg	p.Val272Met/c.814G>A	393	P53	protein_coding	missense_variant	MED	1	rs121912657	0	-1.0	-1.0	0	-1.0	-1.0	1	3.295e-05	2.68288320515e-05	3.22861847415e-05	1	None	0	0	4.32	22.7	0.722319	uncertain	Hereditary_cancer-predisposing_syndrome
y147c.AUMV1	214	214	0	C/C	99.0	692	chr17	7577123	7577124	C	snp	ts	0.00757575757576	65	1	0	0	0.950550440504	TP53	8	ENST00000269305	Gtg/Atg	p.Val272Met/c.814G>A	393	P53	protein_coding	missense_variant	MED	1	rs121912657	0	-1.0	-1.0	0	-1.0	-1.0	1	3.295e-05	2.68288320515e-05	3.22861847415e-05	1	None	0	0	4.32	22.7	0.722319	uncertain	Hereditary_cancer-predisposing_syndrome
y162c.ATR2U	60	60	0	C/C	99.0	692	chr17	7577123	7577124	C	snp	ts	0.00757575757576	65	1	0	0	0.950550440504	TP53	8	ENST00000269305	Gtg/Atg	p.Val272Met/c.814G>A	393	P53	protein_coding	missense_variant	MED	1	rs121912657	0	-1.0	-1.0	0	-1.0	-1.0	1	3.295e-05	2.68288320515e-05	3.22861847415e-05	1	None	0	0	4.32	22.7	0.722319	uncertain	Hereditary_cancer-predisposing_syndrome
y179f.AL9E5	195	195	0	C/C	99.0	692	chr17	7577123	7577124	C	snp	ts	0.00757575757576	65	1	0	0	0.950550440504	TP53	8	ENST00000269305	Gtg/Atg	p.Val272Met/c.814G>A	393	P53	protein_coding	missense_variant	MED	1	rs121912657	0	-1.0	-1.0	0	-1.0	-1.0	1	3.295e-05	2.68288320515e-05	3.22861847415e-05	1	None	0	0	4.32	22.7	0.722319	uncertain	Hereditary_cancer-predisposing_syndrome
y183b.AUMV1	137	137	0	C/C	99.0	692	chr17	7577123	7577124	C	snp	ts	0.00757575757576	65	1	0	0	0.950550440504	TP53	8	ENST00000269305	Gtg/Atg	p.Val272Met/c.814G>A	393	P53	protein_coding	missense_variant	MED	1	rs121912657	0	-1.0	-1.0	0	-1.0	-1.0	1	3.295e-05	2.68288320515e-05	3.22861847415e-05	1	None	0	0	4.32	22.7	0.722319	uncertain	Hereditary_cancer-predisposing_syndrome
y188b.AUMV1	92	91	1	C/C	99.0	692	chr17	7577123	7577124	C	snp	ts	0.00757575757576	65	1	0	0	0.950550440504	TP53	8	ENST00000269305	Gtg/Atg	p.Val272Met/c.814G>A	393	P53	protein_coding	missense_variant	MED	1	rs121912657	0	-1.0	-1.0	0	-1.0	-1.0	1	3.295e-05	2.68288320515e-05	3.22861847415e-05	1	None	0	0	4.32	22.7	0.722319	uncertain	Hereditary_cancer-predisposing_syndrome
y199b.AL9E5	226	226	0	C/C	99.0	692	chr17	7577123	7577124	C	snp	ts	0.00757575757576	65	1	0	0	0.950550440504	TP53	8	ENST00000269305	Gtg/Atg	p.Val272Met/c.814G>A	393	P53	protein_coding	missense_variant	MED	1	rs121912657	0	-1.0	-1.0	0	-1.0	-1.0	1	3.295e-05	2.68288320515e-05	3.22861847415e-05	1	None	0	0	4.32	22.7	0.722319	uncertain	Hereditary_cancer-predisposing_syndrome
y3.AUMV1	72	72	0	C/C	99.0	692	chr17	7577123	7577124	C	snp	ts	0.00757575757576	65	1	0	0	0.950550440504	TP53	8	ENST00000269305	Gtg/Atg	p.Val272Met/c.814G>A	393	P53	protein_coding	missense_variant	MED	1	rs121912657	0	-1.0	-1.0	0	-1.0	-1.0	1	3.295e-05	2.68288320515e-05	3.22861847415e-05	1	None	0	0	4.32	22.7	0.722319	uncertain	Hereditary_cancer-predisposing_syndrome
y68.ATR2U	174	174	0	C/C	99.0	692	chr17	7577123	7577124	C	snp	ts	0.00757575757576	65	1	0	0	0.950550440504	TP53	8	ENST00000269305	Gtg/Atg	p.Val272Met/c.814G>A	393	P53	protein_coding	missense_variant	MED	1	rs121912657	0	-1.0	-1.0	0	-1.0	-1.0	1	3.295e-05	2.68288320515e-05	3.22861847415e-05	1	None	0	0	4.32	22.7	0.722319	uncertain	Hereditary_cancer-predisposing_syndrome
y77.AL9E5	154	154	0	C/C	99.0	692	chr17	7577123	7577124	C	snp	ts	0.00757575757576	65	1	0	0	0.950550440504	TP53	8	ENST00000269305	Gtg/Atg	p.Val272Met/c.814G>A	393	P53	protein_coding	missense_variant	MED	1	rs121912657	0	-1.0	-1.0	0	-1.0	-1.0	1	3.295e-05	2.68288320515e-05	3.22861847415e-05	1	None	0	0	4.32	22.7	0.722319	uncertain	Hereditary_cancer-predisposing_syndrome
y88.AUMV1	20	20	0	C/C	60.0	692	chr17	7577123	7577124	C	snp	ts	0.00757575757576	65	1	0	0	0.950550440504	TP53	8	ENST00000269305	Gtg/Atg	p.Val272Met/c.814G>A	393	P53	protein_coding	missense_variant	MED	1	rs121912657	0	-1.0	-1.0	0	-1.0	-1.0	1	3.295e-05	2.68288320515e-05	3.22861847415e-05	1	None	0	0	4.32	22.7	0.722319	uncertain	Hereditary_cancer-predisposing_syndrome
SA23.ATU14	115	94	21	C/T	99.0	692	chr17	7577123	7577124	C	snp	ts	0.00757575757576	65	1	0	0	0.950550440504	TP53	8	ENST00000269305	Gtg/Atg	p.Val272Met/c.814G>A	393	P53	protein_coding	missense_variant	MED	1	rs121912657	0	-1.0	-1.0	0	-1.0	-1.0	1	3.295e-05	2.68288320515e-05	3.22861847415e-05	1	None	0	0	4.32	22.7	0.722319	uncertain	Hereditary_cancer-predisposing_syndrome
1.ATR2U	300	299	1	C/C	99.0	693	chr17	7577546	7577547	C	snp	ts	0.00757575757576	65	1	0	0	0.950550440504	TP53	7	ENST00000269305	gGc/gAc	p.Gly245Asp/c.734G>A	393	P53	P53	protein_coding	missense_variant		1		0	-1.0		0	-1.0		0	-1.0	-1.0		1		0	0	4.84	27.5	0.722319	pathogenic
17.AUMV1	306	304	2	C/C	99.0	693	chr17	7577546	7577547	C	snp	ts	0.00757575757576	65	1	0	0	0.950550440504	TP53	7	ENST00000269305	gGc/gAc	p.Gly245Asp/c.734G>A	393	P53	P53	protein_coding	missense_variant		1		0	-1.0		0	-1.0		0	-1.0	-1.0		1		0	0	4.84	27.5	0.722319	pathogenic
2.ATR2U	452	452	0	C/C	99.0	693	chr17	7577546	7577547	C	snp	ts	0.00757575757576	65	1	0	0	0.950550440504	TP53	7	ENST00000269305	gGc/gAc	p.Gly245Asp/c.734G>A	393	P53	P53	protein_coding	missense_variant		1		0	-1.0		0	-1.0		0	-1.0	-1.0		1		0	0	4.84	27.5	0.722319	pathogenic
21.AL9E5	9	9	0	C/C	27.0	693	chr17	7577546	7577547	C	snp	ts	0.00757575757576	65	1	0	0	0.950550440504	TP53	7	ENST00000269305	gGc/gAc	p.Gly245Asp/c.734G>A	393	P53	P53	protein_coding	missense_variant		1		0	-1.0		0	-1.0		0	-1.0	-1.0		1		0	0	4.84	27.5	0.722319	pathogenic
22.AUMV1	383	383	0	C/C	99.0	693	chr17	7577546	7577547	C	snp	ts	0.00757575757576	65	1	0	0	0.950550440504	TP53	7	ENST00000269305	gGc/gAc	p.Gly245Asp/c.734G>A	393	P53	P53	protein_coding	missense_variant		1		0	-1.0		0	-1.0		0	-1.0	-1.0		1		0	0	4.84	27.5	0.722319	pathogenic
26.ATU14	193	189	4	C/C	99.0	693	chr17	7577546	7577547	C	snp	ts	0.00757575757576	65	1	0	0	0.950550440504	TP53	7	ENST00000269305	gGc/gAc	p.Gly245Asp/c.734G>A	393	P53	P53	protein_coding	missense_variant		1		0	-1.0		0	-1.0		0	-1.0	-1.0		1		0	0	4.84	27.5	0.722319	pathogenic
31.ATU14	282	282	0	C/C	99.0	693	chr17	7577546	7577547	C	snp	ts	0.00757575757576	65	1	0	0	0.950550440504	TP53	7	ENST00000269305	gGc/gAc	p.Gly245Asp/c.734G>A	393	P53	P53	protein_coding	missense_variant		1		0	-1.0		0	-1.0		0	-1.0	-1.0		1		0	0	4.84	27.5	0.722319	pathogenic
35.ATU14	48	48	0	C/C	99.0	693	chr17	7577546	7577547	C	snp	ts	0.00757575757576	65	1	0	0	0.950550440504	TP53	7	ENST00000269305	gGc/gAc	p.Gly245Asp/c.734G>A	393	P53	P53	protein_coding	missense_variant		1		0	-1.0		0	-1.0		0	-1.0	-1.0		1		0	0	4.84	27.5	0.722319	pathogenic
37.ATU14	152	152	0	C/C	99.0	693	chr17	7577546	7577547	C	snp	ts	0.00757575757576	65	1	0	0	0.950550440504	TP53	7	ENST00000269305	gGc/gAc	p.Gly245Asp/c.734G>A	393	P53	P53	protein_coding	missense_variant		1		0	-1.0		0	-1.0		0	-1.0	-1.0		1		0	0	4.84	27.5	0.722319	pathogenic
45.ATU14	121	121	0	C/C	99.0	693	chr17	7577546	7577547	C	snp	ts	0.00757575757576	65	1	0	0	0.950550440504	TP53	7	ENST00000269305	gGc/gAc	p.Gly245Asp/c.734G>A	393	P53	P53	protein_coding	missense_variant		1		0	-1.0		0	-1.0		0	-1.0	-1.0		1		0	0	4.84	27.5	0.722319	pathogenic
5.ATR2U	355	355	0	C/C	99.0	693	chr17	7577546	7577547	C	snp	ts	0.00757575757576	65	1	0	0	0.950550440504	TP53	7	ENST00000269305	gGc/gAc	p.Gly245Asp/c.734G>A	393	P53	P53	protein_coding	missense_variant		1		0	-1.0		0	-1.0		0	-1.0	-1.0		1		0	0	4.84	27.5	0.722319	pathogenic
63n.AUMV1	84	84	0	C/C	99.0	693	chr17	7577546	7577547	C	snp	ts	0.00757575757576	65	1	0	0	0.950550440504	TP53	7	ENST00000269305	gGc/gAc	p.Gly245Asp/c.734G>A	393	P53	P53	protein_coding	missense_variant		1		0	-1.0		0	-1.0		0	-1.0	-1.0		1		0	0	4.84	27.5	0.722319	pathogenic
7.A8P8B	300	300	0	C/C	99.0	693	chr17	7577546	7577547	C	snp	ts	0.00757575757576	65	1	0	0	0.950550440504	TP53	7	ENST00000269305	gGc/gAc	p.Gly245Asp/c.734G>A	393	P53	P53	protein_coding	missense_variant		1		0	-1.0		0	-1.0		0	-1.0	-1.0		1		0	0	4.84	27.5	0.722319	pathogenic
72.ATR2U	289	287	2	C/C	99.0	693	chr17	7577546	7577547	C	snp	ts	0.00757575757576	65	1	0	0	0.950550440504	TP53	7	ENST00000269305	gGc/gAc	p.Gly245Asp/c.734G>A	393	P53	P53	protein_coding	missense_variant		1		0	-1.0		0	-1.0		0	-1.0	-1.0		1		0	0	4.84	27.5	0.722319	pathogenic
82.ATR2U	171	169	2	C/C	99.0	693	chr17	7577546	7577547	C	snp	ts	0.00757575757576	65	1	0	0	0.950550440504	TP53	7	ENST00000269305	gGc/gAc	p.Gly245Asp/c.734G>A	393	P53	P53	protein_coding	missense_variant		1		0	-1.0		0	-1.0		0	-1.0	-1.0		1		0	0	4.84	27.5	0.722319	pathogenic
84.ATR2U	247	247	0	C/C	99.0	693	chr17	7577546	7577547	C	snp	ts	0.00757575757576	65	1	0	0	0.950550440504	TP53	7	ENST00000269305	gGc/gAc	p.Gly245Asp/c.734G>A	393	P53	P53	protein_coding	missense_variant		1		0	-1.0		0	-1.0		0	-1.0	-1.0		1		0	0	4.84	27.5	0.722319	pathogenic
91n.AUMV1	38	38	0	C/C	99.0	693	chr17	7577546	7577547	C	snp	ts	0.00757575757576	65	1	0	0	0.950550440504	TP53	7	ENST00000269305	gGc/gAc	p.Gly245Asp/c.734G>A	393	P53	P53	protein_coding	missense_variant		1		0	-1.0		0	-1.0		0	-1.0	-1.0		1		0	0	4.84	27.5	0.722319	pathogenic
BS2.ATU14	52	52	0	C/C	99.0	693	chr17	7577546	7577547	C	snp	ts	0.00757575757576	65	1	0	0	0.950550440504	TP53	7	ENST00000269305	gGc/gAc	p.Gly245Asp/c.734G>A	393	P53	P53	protein_coding	missense_variant		1		0	-1.0		0	-1.0		0	-1.0	-1.0		1		0	0	4.84	27.5	0.722319	pathogenic
PS1.A8P8B	116	116	0	C/C	99.0	693	chr17	7577546	7577547	C	snp	ts	0.00757575757576	65	1	0	0	0.950550440504	TP53	7	ENST00000269305	gGc/gAc	p.Gly245Asp/c.734G>A	393	P53	P53	protein_coding	missense_variant		1		0	-1.0		0	-1.0		0	-1.0	-1.0		1		0	0	4.84	27.5	0.722319	pathogenic
PS2.A8P8B	163	163	0	C/C	99.0	693	chr17	7577546	7577547	C	snp	ts	0.00757575757576	65	1	0	0	0.950550440504	TP53	7	ENST00000269305	gGc/gAc	p.Gly245Asp/c.734G>A	393	P53	P53	protein_coding	missense_variant		1		0	-1.0		0	-1.0		0	-1.0	-1.0		1		0	0	4.84	27.5	0.722319	pathogenic
SA23.ATU14	143	143	0	C/C	99.0	693	chr17	7577546	7577547	C	snp	ts	0.00757575757576	65	1	0	0	0.950550440504	TP53	7	ENST00000269305	gGc/gAc	p.Gly245Asp/c.734G>A	393	P53	P53	protein_coding	missense_variant		1		0	-1.0		0	-1.0		0	-1.0	-1.0		1		0	0	4.84	27.5	0.722319	pathogenic
SA33.ATU14	11	11	0	C/C	27.0	693	chr17	7577546	7577547	C	snp	ts	0.00757575757576	65	1	0	0	0.950550440504	TP53	7	ENST00000269305	gGc/gAc	p.Gly245Asp/c.734G>A	393	P53	P53	protein_coding	missense_variant		1		0	-1.0		0	-1.0		0	-1.0	-1.0		1		0	0	4.84	27.5	0.722319	pathogenic
SA36.A8P8B	63	63	0	C/C	99.0	693	chr17	7577546	7577547	C	snp	ts	0.00757575757576	65	1	0	0	0.950550440504	TP53	7	ENST00000269305	gGc/gAc	p.Gly245Asp/c.734G>A	393	P53	P53	protein_coding	missense_variant		1		0	-1.0		0	-1.0		0	-1.0	-1.0		1		0	0	4.84	27.5	0.722319	pathogenic
SA38.ATU14	34	34	0	C/C	96.0	693	chr17	7577546	7577547	C	snp	ts	0.00757575757576	65	1	0	0	0.950550440504	TP53	7	ENST00000269305	gGc/gAc	p.Gly245Asp/c.734G>A	393	P53	P53	protein_coding	missense_variant		1		0	-1.0		0	-1.0		0	-1.0	-1.0		1		0	0	4.84	27.5	0.722319	pathogenic
SA41.ATU14	179	179	0	C/C	99.0	693	chr17	7577546	7577547	C	snp	ts	0.00757575757576	65	1	0	0	0.950550440504	TP53	7	ENST00000269305	gGc/gAc	p.Gly245Asp/c.734G>A	393	P53	P53	protein_coding	missense_variant		1		0	-1.0		0	-1.0		0	-1.0	-1.0		1		0	0	4.84	27.5	0.722319	pathogenic
Y102.ATU14	55	55	0	C/C	99.0	693	chr17	7577546	7577547	C	snp	ts	0.00757575757576	65	1	0	0	0.950550440504	TP53	7	ENST00000269305	gGc/gAc	p.Gly245Asp/c.734G>A	393	P53	P53	protein_coding	missense_variant		1		0	-1.0		0	-1.0		0	-1.0	-1.0		1		0	0	4.84	27.5	0.722319	pathogenic
Y105.ATU14	63	63	0	C/C	99.0	693	chr17	7577546	7577547	C	snp	ts	0.00757575757576	65	1	0	0	0.950550440504	TP53	7	ENST00000269305	gGc/gAc	p.Gly245Asp/c.734G>A	393	P53	P53	protein_coding	missense_variant		1		0	-1.0		0	-1.0		0	-1.0	-1.0		1		0	0	4.84	27.5	0.722319	pathogenic
Y115B.ATU14	258	258	0	C/C	99.0	693	chr17	7577546	7577547	C	snp	ts	0.00757575757576	65	1	0	0	0.950550440504	TP53	7	ENST00000269305	gGc/gAc	p.Gly245Asp/c.734G>A	393	P53	P53	protein_coding	missense_variant		1		0	-1.0		0	-1.0		0	-1.0	-1.0		1		0	0	4.84	27.5	0.722319	pathogenic
Y123B.ATU14	277	276	1	C/C	99.0	693	chr17	7577546	7577547	C	snp	ts	0.00757575757576	65	1	0	0	0.950550440504	TP53	7	ENST00000269305	gGc/gAc	p.Gly245Asp/c.734G>A	393	P53	P53	protein_coding	missense_variant		1		0	-1.0		0	-1.0		0	-1.0	-1.0		1		0	0	4.84	27.5	0.722319	pathogenic
Y135.ATU14	375	371	4	C/C	99.0	693	chr17	7577546	7577547	C	snp	ts	0.00757575757576	65	1	0	0	0.950550440504	TP53	7	ENST00000269305	gGc/gAc	p.Gly245Asp/c.734G>A	393	P53	P53	protein_coding	missense_variant		1		0	-1.0		0	-1.0		0	-1.0	-1.0		1		0	0	4.84	27.5	0.722319	pathogenic
Y137B.ATU14	144	144	0	C/C	99.0	693	chr17	7577546	7577547	C	snp	ts	0.00757575757576	65	1	0	0	0.950550440504	TP53	7	ENST00000269305	gGc/gAc	p.Gly245Asp/c.734G>A	393	P53	P53	protein_coding	missense_variant		1		0	-1.0		0	-1.0		0	-1.0	-1.0		1		0	0	4.84	27.5	0.722319	pathogenic
Y143C.ATU14	87	87	0	C/C	99.0	693	chr17	7577546	7577547	C	snp	ts	0.00757575757576	65	1	0	0	0.950550440504	TP53	7	ENST00000269305	gGc/gAc	p.Gly245Asp/c.734G>A	393	P53	P53	protein_coding	missense_variant		1		0	-1.0		0	-1.0		0	-1.0	-1.0		1		0	0	4.84	27.5	0.722319	pathogenic
Y145B.ATU14	503	502	1	C/C	99.0	693	chr17	7577546	7577547	C	snp	ts	0.00757575757576	65	1	0	0	0.950550440504	TP53	7	ENST00000269305	gGc/gAc	p.Gly245Asp/c.734G>A	393	P53	P53	protein_coding	missense_variant		1		0	-1.0		0	-1.0		0	-1.0	-1.0		1		0	0	4.84	27.5	0.722319	pathogenic
Y146B.A8P8B	57	57	0	C/C	99.0	693	chr17	7577546	7577547	C	snp	ts	0.00757575757576	65	1	0	0	0.950550440504	TP53	7	ENST00000269305	gGc/gAc	p.Gly245Asp/c.734G>A	393	P53	P53	protein_coding	missense_variant		1		0	-1.0		0	-1.0		0	-1.0	-1.0		1		0	0	4.84	27.5	0.722319	pathogenic
Y151B.ATU14	103	99	4	C/C	99.0	693	chr17	7577546	7577547	C	snp	ts	0.00757575757576	65	1	0	0	0.950550440504	TP53	7	ENST00000269305	gGc/gAc	p.Gly245Asp/c.734G>A	393	P53	P53	protein_coding	missense_variant		1		0	-1.0		0	-1.0		0	-1.0	-1.0		1		0	0	4.84	27.5	0.722319	pathogenic
Y159C.ATU14	53	53	0	C/C	99.0	693	chr17	7577546	7577547	C	snp	ts	0.00757575757576	65	1	0	0	0.950550440504	TP53	7	ENST00000269305	gGc/gAc	p.Gly245Asp/c.734G>A	393	P53	P53	protein_coding	missense_variant		1		0	-1.0		0	-1.0		0	-1.0	-1.0		1		0	0	4.84	27.5	0.722319	pathogenic
Y161C.ATU14	28	28	0	C/C	78.0	693	chr17	7577546	7577547	C	snp	ts	0.00757575757576	65	1	0	0	0.950550440504	TP53	7	ENST00000269305	gGc/gAc	p.Gly245Asp/c.734G>A	393	P53	P53	protein_coding	missense_variant		1		0	-1.0		0	-1.0		0	-1.0	-1.0		1		0	0	4.84	27.5	0.722319	pathogenic
Y165B.ATU14	222	222	0	C/C	99.0	693	chr17	7577546	7577547	C	snp	ts	0.00757575757576	65	1	0	0	0.950550440504	TP53	7	ENST00000269305	gGc/gAc	p.Gly245Asp/c.734G>A	393	P53	P53	protein_coding	missense_variant		1		0	-1.0		0	-1.0		0	-1.0	-1.0		1		0	0	4.84	27.5	0.722319	pathogenic
Y167B.A8P8B	78	78	0	C/C	99.0	693	chr17	7577546	7577547	C	snp	ts	0.00757575757576	65	1	0	0	0.950550440504	TP53	7	ENST00000269305	gGc/gAc	p.Gly245Asp/c.734G>A	393	P53	P53	protein_coding	missense_variant		1		0	-1.0		0	-1.0		0	-1.0	-1.0		1		0	0	4.84	27.5	0.722319	pathogenic
Y168C.A8P8B	11	11	0	C/C	27.0	693	chr17	7577546	7577547	C	snp	ts	0.00757575757576	65	1	0	0	0.950550440504	TP53	7	ENST00000269305	gGc/gAc	p.Gly245Asp/c.734G>A	393	P53	P53	protein_coding	missense_variant		1		0	-1.0		0	-1.0		0	-1.0	-1.0		1		0	0	4.84	27.5	0.722319	pathogenic
Y169C.ATU14	106	106	0	C/C	99.0	693	chr17	7577546	7577547	C	snp	ts	0.00757575757576	65	1	0	0	0.950550440504	TP53	7	ENST00000269305	gGc/gAc	p.Gly245Asp/c.734G>A	393	P53	P53	protein_coding	missense_variant		1		0	-1.0		0	-1.0		0	-1.0	-1.0		1		0	0	4.84	27.5	0.722319	pathogenic
ps4.AL9E5	166	164	2	C/C	99.0	693	chr17	7577546	7577547	C	snp	ts	0.00757575757576	65	1	0	0	0.950550440504	TP53	7	ENST00000269305	gGc/gAc	p.Gly245Asp/c.734G>A	393	P53	P53	protein_coding	missense_variant		1		0	-1.0		0	-1.0		0	-1.0	-1.0		1		0	0	4.84	27.5	0.722319	pathogenic
ps6.AUMV1	60	60	0	C/C	99.0	693	chr17	7577546	7577547	C	snp	ts	0.00757575757576	65	1	0	0	0.950550440504	TP53	7	ENST00000269305	gGc/gAc	p.Gly245Asp/c.734G>A	393	P53	P53	protein_coding	missense_variant		1		0	-1.0		0	-1.0		0	-1.0	-1.0		1		0	0	4.84	27.5	0.722319	pathogenic
sa14.AL9E5	224	224	0	C/C	99.0	693	chr17	7577546	7577547	C	snp	ts	0.00757575757576	65	1	0	0	0.950550440504	TP53	7	ENST00000269305	gGc/gAc	p.Gly245Asp/c.734G>A	393	P53	P53	protein_coding	missense_variant		1		0	-1.0		0	-1.0		0	-1.0	-1.0		1		0	0	4.84	27.5	0.722319	pathogenic
sa39.AL9E5	27	27	0	C/C	81.0	693	chr17	7577546	7577547	C	snp	ts	0.00757575757576	65	1	0	0	0.950550440504	TP53	7	ENST00000269305	gGc/gAc	p.Gly245Asp/c.734G>A	393	P53	P53	protein_coding	missense_variant		1		0	-1.0		0	-1.0		0	-1.0	-1.0		1		0	0	4.84	27.5	0.722319	pathogenic
sa40.ATR2U	207	205	2	C/C	99.0	693	chr17	7577546	7577547	C	snp	ts	0.00757575757576	65	1	0	0	0.950550440504	TP53	7	ENST00000269305	gGc/gAc	p.Gly245Asp/c.734G>A	393	P53	P53	protein_coding	missense_variant		1		0	-1.0		0	-1.0		0	-1.0	-1.0		1		0	0	4.84	27.5	0.722319	pathogenic
y103.AUMV1	386	382	4	C/C	99.0	693	chr17	7577546	7577547	C	snp	ts	0.00757575757576	65	1	0	0	0.950550440504	TP53	7	ENST00000269305	gGc/gAc	p.Gly245Asp/c.734G>A	393	P53	P53	protein_coding	missense_variant		1		0	-1.0		0	-1.0		0	-1.0	-1.0		1		0	0	4.84	27.5	0.722319	pathogenic
y104.ATR2U	40	40	0	C/C	99.0	693	chr17	7577546	7577547	C	snp	ts	0.00757575757576	65	1	0	0	0.950550440504	TP53	7	ENST00000269305	gGc/gAc	p.Gly245Asp/c.734G>A	393	P53	P53	protein_coding	missense_variant		1		0	-1.0		0	-1.0		0	-1.0	-1.0		1		0	0	4.84	27.5	0.722319	pathogenic
y109b.AUMV1	49	49	0	C/C	99.0	693	chr17	7577546	7577547	C	snp	ts	0.00757575757576	65	1	0	0	0.950550440504	TP53	7	ENST00000269305	gGc/gAc	p.Gly245Asp/c.734G>A	393	P53	P53	protein_coding	missense_variant		1		0	-1.0		0	-1.0		0	-1.0	-1.0		1		0	0	4.84	27.5	0.722319	pathogenic
y110b.AUMV1	22	22	0	C/C	45.0	693	chr17	7577546	7577547	C	snp	ts	0.00757575757576	65	1	0	0	0.950550440504	TP53	7	ENST00000269305	gGc/gAc	p.Gly245Asp/c.734G>A	393	P53	P53	protein_coding	missense_variant		1		0	-1.0		0	-1.0		0	-1.0	-1.0		1		0	0	4.84	27.5	0.722319	pathogenic
y128b.AUMV1	250	248	2	C/C	99.0	693	chr17	7577546	7577547	C	snp	ts	0.00757575757576	65	1	0	0	0.950550440504	TP53	7	ENST00000269305	gGc/gAc	p.Gly245Asp/c.734G>A	393	P53	P53	protein_coding	missense_variant		1		0	-1.0		0	-1.0		0	-1.0	-1.0		1		0	0	4.84	27.5	0.722319	pathogenic
y132b.AUMV1	72	72	0	C/C	99.0	693	chr17	7577546	7577547	C	snp	ts	0.00757575757576	65	1	0	0	0.950550440504	TP53	7	ENST00000269305	gGc/gAc	p.Gly245Asp/c.734G>A	393	P53	P53	protein_coding	missense_variant		1		0	-1.0		0	-1.0		0	-1.0	-1.0		1		0	0	4.84	27.5	0.722319	pathogenic
y134b.AL9E5	246	246	0	C/C	99.0	693	chr17	7577546	7577547	C	snp	ts	0.00757575757576	65	1	0	0	0.950550440504	TP53	7	ENST00000269305	gGc/gAc	p.Gly245Asp/c.734G>A	393	P53	P53	protein_coding	missense_variant		1		0	-1.0		0	-1.0		0	-1.0	-1.0		1		0	0	4.84	27.5	0.722319	pathogenic
y144c.AUMV1	109	109	0	C/C	99.0	693	chr17	7577546	7577547	C	snp	ts	0.00757575757576	65	1	0	0	0.950550440504	TP53	7	ENST00000269305	gGc/gAc	p.Gly245Asp/c.734G>A	393	P53	P53	protein_coding	missense_variant		1		0	-1.0		0	-1.0		0	-1.0	-1.0		1		0	0	4.84	27.5	0.722319	pathogenic
y147c.AUMV1	350	349	1	C/C	99.0	693	chr17	7577546	7577547	C	snp	ts	0.00757575757576	65	1	0	0	0.950550440504	TP53	7	ENST00000269305	gGc/gAc	p.Gly245Asp/c.734G>A	393	P53	P53	protein_coding	missense_variant		1		0	-1.0		0	-1.0		0	-1.0	-1.0		1		0	0	4.84	27.5	0.722319	pathogenic
y162c.ATR2U	35	35	0	C/C	90.0	693	chr17	7577546	7577547	C	snp	ts	0.00757575757576	65	1	0	0	0.950550440504	TP53	7	ENST00000269305	gGc/gAc	p.Gly245Asp/c.734G>A	393	P53	P53	protein_coding	missense_variant		1		0	-1.0		0	-1.0		0	-1.0	-1.0		1		0	0	4.84	27.5	0.722319	pathogenic
y179f.AL9E5	311	309	2	C/C	99.0	693	chr17	7577546	7577547	C	snp	ts	0.00757575757576	65	1	0	0	0.950550440504	TP53	7	ENST00000269305	gGc/gAc	p.Gly245Asp/c.734G>A	393	P53	P53	protein_coding	missense_variant		1		0	-1.0		0	-1.0		0	-1.0	-1.0		1		0	0	4.84	27.5	0.722319	pathogenic
y183b.AUMV1	138	136	2	C/C	99.0	693	chr17	7577546	7577547	C	snp	ts	0.00757575757576	65	1	0	0	0.950550440504	TP53	7	ENST00000269305	gGc/gAc	p.Gly245Asp/c.734G>A	393	P53	P53	protein_coding	missense_variant		1		0	-1.0		0	-1.0		0	-1.0	-1.0		1		0	0	4.84	27.5	0.722319	pathogenic
y188b.AUMV1	103	103	0	C/C	99.0	693	chr17	7577546	7577547	C	snp	ts	0.00757575757576	65	1	0	0	0.950550440504	TP53	7	ENST00000269305	gGc/gAc	p.Gly245Asp/c.734G>A	393	P53	P53	protein_coding	missense_variant		1		0	-1.0		0	-1.0		0	-1.0	-1.0		1		0	0	4.84	27.5	0.722319	pathogenic
y199b.AL9E5	155	155	0	C/C	99.0	693	chr17	7577546	7577547	C	snp	ts	0.00757575757576	65	1	0	0	0.950550440504	TP53	7	ENST00000269305	gGc/gAc	p.Gly245Asp/c.734G>A	393	P53	P53	protein_coding	missense_variant		1		0	-1.0		0	-1.0		0	-1.0	-1.0		1		0	0	4.84	27.5	0.722319	pathogenic
y3.AUMV1	77	73	4	C/C	99.0	693	chr17	7577546	7577547	C	snp	ts	0.00757575757576	65	1	0	0	0.950550440504	TP53	7	ENST00000269305	gGc/gAc	p.Gly245Asp/c.734G>A	393	P53	P53	protein_coding	missense_variant		1		0	-1.0		0	-1.0		0	-1.0	-1.0		1		0	0	4.84	27.5	0.722319	pathogenic
y68.ATR2U	259	259	0	C/C	99.0	693	chr17	7577546	7577547	C	snp	ts	0.00757575757576	65	1	0	0	0.950550440504	TP53	7	ENST00000269305	gGc/gAc	p.Gly245Asp/c.734G>A	393	P53	P53	protein_coding	missense_variant		1		0	-1.0		0	-1.0		0	-1.0	-1.0		1		0	0	4.84	27.5	0.722319	pathogenic
y77.AL9E5	261	261	0	C/C	99.0	693	chr17	7577546	7577547	C	snp	ts	0.00757575757576	65	1	0	0	0.950550440504	TP53	7	ENST00000269305	gGc/gAc	p.Gly245Asp/c.734G>A	393	P53	P53	protein_coding	missense_variant		1		0	-1.0		0	-1.0		0	-1.0	-1.0		1		0	0	4.84	27.5	0.722319	pathogenic
y88.AUMV1	50	50	0	C/C	99.0	693	chr17	7577546	7577547	C	snp	ts	0.00757575757576	65	1	0	0	0.950550440504	TP53	7	ENST00000269305	gGc/gAc	p.Gly245Asp/c.734G>A	393	P53	P53	protein_coding	missense_variant		1		0	-1.0		0	-1.0		0	-1.0	-1.0		1		0	0	4.84	27.5	0.722319	pathogenic
10.ATU14	146	109	37	C/T	99.0	693	chr17	7577546	7577547	C	snp	ts	0.00757575757576	65	1	0	0	0.950550440504	TP53	7	ENST00000269305	gGc/gAc	p.Gly245Asp/c.734G>A	393	P53	P53	protein_coding	missense_variant		1		0	-1.0		0	-1.0		0	-1.0	-1.0		1		0	0	4.84	27.5	0.722319	pathogenic
1.ATR2U	341	341	0	T/T	99.0	694	chr17	7578209	7578210	T	snp	ts	0.0378787878788	61	5	0	0	0.749086566952	TP53	6	ENST00000269305	cgA/cgG	p.Arg213Arg/c.639A>G	393	P53	P53	protein_coding	synonymous_variant		1		1	0.0193023255814		1	0.0169		1	0.012	0.0120355532059		0		0	0	2.51	14.37	0.722319	benign
10.ATU14	179	178	1	T/T	99.0	694	chr17	7578209	7578210	T	snp	ts	0.0378787878788	61	5	0	0	0.749086566952	TP53	6	ENST00000269305	cgA/cgG	p.Arg213Arg/c.639A>G	393	P53	P53	protein_coding	synonymous_variant		1		1	0.0193023255814		1	0.0169		1	0.012	0.0120355532059		0		0	0	2.51	14.37	0.722319	benign
17.AUMV1	231	231	0	T/T	99.0	694	chr17	7578209	7578210	T	snp	ts	0.0378787878788	61	5	0	0	0.749086566952	TP53	6	ENST00000269305	cgA/cgG	p.Arg213Arg/c.639A>G	393	P53	P53	protein_coding	synonymous_variant		1		1	0.0193023255814		1	0.0169		1	0.012	0.0120355532059		0		0	0	2.51	14.37	0.722319	benign
2.ATR2U	561	559	2	T/T	99.0	694	chr17	7578209	7578210	T	snp	ts	0.0378787878788	61	5	0	0	0.749086566952	TP53	6	ENST00000269305	cgA/cgG	p.Arg213Arg/c.639A>G	393	P53	P53	protein_coding	synonymous_variant		1		1	0.0193023255814		1	0.0169		1	0.012	0.0120355532059		0		0	0	2.51	14.37	0.722319	benign
21.AL9E5	32	32	0	T/T	96.0	694	chr17	7578209	7578210	T	snp	ts	0.0378787878788	61	5	0	0	0.749086566952	TP53	6	ENST00000269305	cgA/cgG	p.Arg213Arg/c.639A>G	393	P53	P53	protein_coding	synonymous_variant		1		1	0.0193023255814		1	0.0169		1	0.012	0.0120355532059		0		0	0	2.51	14.37	0.722319	benign
22.AUMV1	361	361	0	T/T	99.0	694	chr17	7578209	7578210	T	snp	ts	0.0378787878788	61	5	0	0	0.749086566952	TP53	6	ENST00000269305	cgA/cgG	p.Arg213Arg/c.639A>G	393	P53	P53	protein_coding	synonymous_variant		1		1	0.0193023255814		1	0.0169		1	0.012	0.0120355532059		0		0	0	2.51	14.37	0.722319	benign
26.ATU14	237	237	0	T/T	99.0	694	chr17	7578209	7578210	T	snp	ts	0.0378787878788	61	5	0	0	0.749086566952	TP53	6	ENST00000269305	cgA/cgG	p.Arg213Arg/c.639A>G	393	P53	P53	protein_coding	synonymous_variant		1		1	0.0193023255814		1	0.0169		1	0.012	0.0120355532059		0		0	0	2.51	14.37	0.722319	benign
31.ATU14	362	361	1	T/T	99.0	694	chr17	7578209	7578210	T	snp	ts	0.0378787878788	61	5	0	0	0.749086566952	TP53	6	ENST00000269305	cgA/cgG	p.Arg213Arg/c.639A>G	393	P53	P53	protein_coding	synonymous_variant		1		1	0.0193023255814		1	0.0169		1	0.012	0.0120355532059		0		0	0	2.51	14.37	0.722319	benign
35.ATU14	61	60	1	T/T	99.0	694	chr17	7578209	7578210	T	snp	ts	0.0378787878788	61	5	0	0	0.749086566952	TP53	6	ENST00000269305	cgA/cgG	p.Arg213Arg/c.639A>G	393	P53	P53	protein_coding	synonymous_variant		1		1	0.0193023255814		1	0.0169		1	0.012	0.0120355532059		0		0	0	2.51	14.37	0.722319	benign
37.ATU14	88	88	0	T/T	99.0	694	chr17	7578209	7578210	T	snp	ts	0.0378787878788	61	5	0	0	0.749086566952	TP53	6	ENST00000269305	cgA/cgG	p.Arg213Arg/c.639A>G	393	P53	P53	protein_coding	synonymous_variant		1		1	0.0193023255814		1	0.0169		1	0.012	0.0120355532059		0		0	0	2.51	14.37	0.722319	benign
45.ATU14	133	133	0	T/T	99.0	694	chr17	7578209	7578210	T	snp	ts	0.0378787878788	61	5	0	0	0.749086566952	TP53	6	ENST00000269305	cgA/cgG	p.Arg213Arg/c.639A>G	393	P53	P53	protein_coding	synonymous_variant		1		1	0.0193023255814		1	0.0169		1	0.012	0.0120355532059		0		0	0	2.51	14.37	0.722319	benign
5.ATR2U	489	487	2	T/T	99.0	694	chr17	7578209	7578210	T	snp	ts	0.0378787878788	61	5	0	0	0.749086566952	TP53	6	ENST00000269305	cgA/cgG	p.Arg213Arg/c.639A>G	393	P53	P53	protein_coding	synonymous_variant		1		1	0.0193023255814		1	0.0169		1	0.012	0.0120355532059		0		0	0	2.51	14.37	0.722319	benign
7.A8P8B	410	408	2	T/T	99.0	694	chr17	7578209	7578210	T	snp	ts	0.0378787878788	61	5	0	0	0.749086566952	TP53	6	ENST00000269305	cgA/cgG	p.Arg213Arg/c.639A>G	393	P53	P53	protein_coding	synonymous_variant		1		1	0.0193023255814		1	0.0169		1	0.012	0.0120355532059		0		0	0	2.51	14.37	0.722319	benign
72.ATR2U	464	464	0	T/T	99.0	694	chr17	7578209	7578210	T	snp	ts	0.0378787878788	61	5	0	0	0.749086566952	TP53	6	ENST00000269305	cgA/cgG	p.Arg213Arg/c.639A>G	393	P53	P53	protein_coding	synonymous_variant		1		1	0.0193023255814		1	0.0169		1	0.012	0.0120355532059		0		0	0	2.51	14.37	0.722319	benign
84.ATR2U	394	394	0	T/T	99.0	694	chr17	7578209	7578210	T	snp	ts	0.0378787878788	61	5	0	0	0.749086566952	TP53	6	ENST00000269305	cgA/cgG	p.Arg213Arg/c.639A>G	393	P53	P53	protein_coding	synonymous_variant		1		1	0.0193023255814		1	0.0169		1	0.012	0.0120355532059		0		0	0	2.51	14.37	0.722319	benign
BS2.ATU14	50	50	0	T/T	99.0	694	chr17	7578209	7578210	T	snp	ts	0.0378787878788	61	5	0	0	0.749086566952	TP53	6	ENST00000269305	cgA/cgG	p.Arg213Arg/c.639A>G	393	P53	P53	protein_coding	synonymous_variant		1		1	0.0193023255814		1	0.0169		1	0.012	0.0120355532059		0		0	0	2.51	14.37	0.722319	benign
PS1.A8P8B	207	207	0	T/T	99.0	694	chr17	7578209	7578210	T	snp	ts	0.0378787878788	61	5	0	0	0.749086566952	TP53	6	ENST00000269305	cgA/cgG	p.Arg213Arg/c.639A>G	393	P53	P53	protein_coding	synonymous_variant		1		1	0.0193023255814		1	0.0169		1	0.012	0.0120355532059		0		0	0	2.51	14.37	0.722319	benign
PS2.A8P8B	167	167	0	T/T	99.0	694	chr17	7578209	7578210	T	snp	ts	0.0378787878788	61	5	0	0	0.749086566952	TP53	6	ENST00000269305	cgA/cgG	p.Arg213Arg/c.639A>G	393	P53	P53	protein_coding	synonymous_variant		1		1	0.0193023255814		1	0.0169		1	0.012	0.0120355532059		0		0	0	2.51	14.37	0.722319	benign
SA23.ATU14	122	122	0	T/T	99.0	694	chr17	7578209	7578210	T	snp	ts	0.0378787878788	61	5	0	0	0.749086566952	TP53	6	ENST00000269305	cgA/cgG	p.Arg213Arg/c.639A>G	393	P53	P53	protein_coding	synonymous_variant		1		1	0.0193023255814		1	0.0169		1	0.012	0.0120355532059		0		0	0	2.51	14.37	0.722319	benign
SA33.ATU14	16	16	0	T/T	48.0	694	chr17	7578209	7578210	T	snp	ts	0.0378787878788	61	5	0	0	0.749086566952	TP53	6	ENST00000269305	cgA/cgG	p.Arg213Arg/c.639A>G	393	P53	P53	protein_coding	synonymous_variant		1		1	0.0193023255814		1	0.0169		1	0.012	0.0120355532059		0		0	0	2.51	14.37	0.722319	benign
SA36.A8P8B	75	75	0	T/T	99.0	694	chr17	7578209	7578210	T	snp	ts	0.0378787878788	61	5	0	0	0.749086566952	TP53	6	ENST00000269305	cgA/cgG	p.Arg213Arg/c.639A>G	393	P53	P53	protein_coding	synonymous_variant		1		1	0.0193023255814		1	0.0169		1	0.012	0.0120355532059		0		0	0	2.51	14.37	0.722319	benign
SA38.ATU14	35	35	0	T/T	99.0	694	chr17	7578209	7578210	T	snp	ts	0.0378787878788	61	5	0	0	0.749086566952	TP53	6	ENST00000269305	cgA/cgG	p.Arg213Arg/c.639A>G	393	P53	P53	protein_coding	synonymous_variant		1		1	0.0193023255814		1	0.0169		1	0.012	0.0120355532059		0		0	0	2.51	14.37	0.722319	benign
SA41.ATU14	217	216	1	T/T	99.0	694	chr17	7578209	7578210	T	snp	ts	0.0378787878788	61	5	0	0	0.749086566952	TP53	6	ENST00000269305	cgA/cgG	p.Arg213Arg/c.639A>G	393	P53	P53	protein_coding	synonymous_variant		1		1	0.0193023255814		1	0.0169		1	0.012	0.0120355532059		0		0	0	2.51	14.37	0.722319	benign
Y102.ATU14	37	37	0	T/T	99.0	694	chr17	7578209	7578210	T	snp	ts	0.0378787878788	61	5	0	0	0.749086566952	TP53	6	ENST00000269305	cgA/cgG	p.Arg213Arg/c.639A>G	393	P53	P53	protein_coding	synonymous_variant		1		1	0.0193023255814		1	0.0169		1	0.012	0.0120355532059		0		0	0	2.51	14.37	0.722319	benign
Y105.ATU14	47	47	0	T/T	99.0	694	chr17	7578209	7578210	T	snp	ts	0.0378787878788	61	5	0	0	0.749086566952	TP53	6	ENST00000269305	cgA/cgG	p.Arg213Arg/c.639A>G	393	P53	P53	protein_coding	synonymous_variant		1		1	0.0193023255814		1	0.0169		1	0.012	0.0120355532059		0		0	0	2.51	14.37	0.722319	benign
Y115B.ATU14	233	232	1	T/T	99.0	694	chr17	7578209	7578210	T	snp	ts	0.0378787878788	61	5	0	0	0.749086566952	TP53	6	ENST00000269305	cgA/cgG	p.Arg213Arg/c.639A>G	393	P53	P53	protein_coding	synonymous_variant		1		1	0.0193023255814		1	0.0169		1	0.012	0.0120355532059		0		0	0	2.51	14.37	0.722319	benign
Y123B.ATU14	206	206	0	T/T	99.0	694	chr17	7578209	7578210	T	snp	ts	0.0378787878788	61	5	0	0	0.749086566952	TP53	6	ENST00000269305	cgA/cgG	p.Arg213Arg/c.639A>G	393	P53	P53	protein_coding	synonymous_variant		1		1	0.0193023255814		1	0.0169		1	0.012	0.0120355532059		0		0	0	2.51	14.37	0.722319	benign
Y135.ATU14	448	447	1	T/T	99.0	694	chr17	7578209	7578210	T	snp	ts	0.0378787878788	61	5	0	0	0.749086566952	TP53	6	ENST00000269305	cgA/cgG	p.Arg213Arg/c.639A>G	393	P53	P53	protein_coding	synonymous_variant		1		1	0.0193023255814		1	0.0169		1	0.012	0.0120355532059		0		0	0	2.51	14.37	0.722319	benign
Y137B.ATU14	139	139	0	T/T	99.0	694	chr17	7578209	7578210	T	snp	ts	0.0378787878788	61	5	0	0	0.749086566952	TP53	6	ENST00000269305	cgA/cgG	p.Arg213Arg/c.639A>G	393	P53	P53	protein_coding	synonymous_variant		1		1	0.0193023255814		1	0.0169		1	0.012	0.0120355532059		0		0	0	2.51	14.37	0.722319	benign
Y143C.ATU14	75	75	0	T/T	99.0	694	chr17	7578209	7578210	T	snp	ts	0.0378787878788	61	5	0	0	0.749086566952	TP53	6	ENST00000269305	cgA/cgG	p.Arg213Arg/c.639A>G	393	P53	P53	protein_coding	synonymous_variant		1		1	0.0193023255814		1	0.0169		1	0.012	0.0120355532059		0		0	0	2.51	14.37	0.722319	benign
Y145B.ATU14	616	614	2	T/T	99.0	694	chr17	7578209	7578210	T	snp	ts	0.0378787878788	61	5	0	0	0.749086566952	TP53	6	ENST00000269305	cgA/cgG	p.Arg213Arg/c.639A>G	393	P53	P53	protein_coding	synonymous_variant		1		1	0.0193023255814		1	0.0169		1	0.012	0.0120355532059		0		0	0	2.51	14.37	0.722319	benign
Y151B.ATU14	60	60	0	T/T	99.0	694	chr17	7578209	7578210	T	snp	ts	0.0378787878788	61	5	0	0	0.749086566952	TP53	6	ENST00000269305	cgA/cgG	p.Arg213Arg/c.639A>G	393	P53	P53	protein_coding	synonymous_variant		1		1	0.0193023255814		1	0.0169		1	0.012	0.0120355532059		0		0	0	2.51	14.37	0.722319	benign
Y159C.ATU14	93	92	1	T/T	99.0	694	chr17	7578209	7578210	T	snp	ts	0.0378787878788	61	5	0	0	0.749086566952	TP53	6	ENST00000269305	cgA/cgG	p.Arg213Arg/c.639A>G	393	P53	P53	protein_coding	synonymous_variant		1		1	0.0193023255814		1	0.0169		1	0.012	0.0120355532059		0		0	0	2.51	14.37	0.722319	benign
Y161C.ATU14	22	22	0	T/T	63.0	694	chr17	7578209	7578210	T	snp	ts	0.0378787878788	61	5	0	0	0.749086566952	TP53	6	ENST00000269305	cgA/cgG	p.Arg213Arg/c.639A>G	393	P53	P53	protein_coding	synonymous_variant		1		1	0.0193023255814		1	0.0169		1	0.012	0.0120355532059		0		0	0	2.51	14.37	0.722319	benign
Y165B.ATU14	215	214	1	T/T	99.0	694	chr17	7578209	7578210	T	snp	ts	0.0378787878788	61	5	0	0	0.749086566952	TP53	6	ENST00000269305	cgA/cgG	p.Arg213Arg/c.639A>G	393	P53	P53	protein_coding	synonymous_variant		1		1	0.0193023255814		1	0.0169		1	0.012	0.0120355532059		0		0	0	2.51	14.37	0.722319	benign
Y167B.A8P8B	124	124	0	T/T	99.0	694	chr17	7578209	7578210	T	snp	ts	0.0378787878788	61	5	0	0	0.749086566952	TP53	6	ENST00000269305	cgA/cgG	p.Arg213Arg/c.639A>G	393	P53	P53	protein_coding	synonymous_variant		1		1	0.0193023255814		1	0.0169		1	0.012	0.0120355532059		0		0	0	2.51	14.37	0.722319	benign
Y168C.A8P8B	24	24	0	T/T	72.0	694	chr17	7578209	7578210	T	snp	ts	0.0378787878788	61	5	0	0	0.749086566952	TP53	6	ENST00000269305	cgA/cgG	p.Arg213Arg/c.639A>G	393	P53	P53	protein_coding	synonymous_variant		1		1	0.0193023255814		1	0.0169		1	0.012	0.0120355532059		0		0	0	2.51	14.37	0.722319	benign
Y169C.ATU14	69	69	0	T/T	99.0	694	chr17	7578209	7578210	T	snp	ts	0.0378787878788	61	5	0	0	0.749086566952	TP53	6	ENST00000269305	cgA/cgG	p.Arg213Arg/c.639A>G	393	P53	P53	protein_coding	synonymous_variant		1		1	0.0193023255814		1	0.0169		1	0.012	0.0120355532059		0		0	0	2.51	14.37	0.722319	benign
ps4.AL9E5	192	192	0	T/T	99.0	694	chr17	7578209	7578210	T	snp	ts	0.0378787878788	61	5	0	0	0.749086566952	TP53	6	ENST00000269305	cgA/cgG	p.Arg213Arg/c.639A>G	393	P53	P53	protein_coding	synonymous_variant		1		1	0.0193023255814		1	0.0169		1	0.012	0.0120355532059		0		0	0	2.51	14.37	0.722319	benign
ps6.AUMV1	111	111	0	T/T	99.0	694	chr17	7578209	7578210	T	snp	ts	0.0378787878788	61	5	0	0	0.749086566952	TP53	6	ENST00000269305	cgA/cgG	p.Arg213Arg/c.639A>G	393	P53	P53	protein_coding	synonymous_variant		1		1	0.0193023255814		1	0.0169		1	0.012	0.0120355532059		0		0	0	2.51	14.37	0.722319	benign
sa14.AL9E5	275	275	0	T/T	99.0	694	chr17	7578209	7578210	T	snp	ts	0.0378787878788	61	5	0	0	0.749086566952	TP53	6	ENST00000269305	cgA/cgG	p.Arg213Arg/c.639A>G	393	P53	P53	protein_coding	synonymous_variant		1		1	0.0193023255814		1	0.0169		1	0.012	0.0120355532059		0		0	0	2.51	14.37	0.722319	benign
sa39.AL9E5	48	48	0	T/T	99.0	694	chr17	7578209	7578210	T	snp	ts	0.0378787878788	61	5	0	0	0.749086566952	TP53	6	ENST00000269305	cgA/cgG	p.Arg213Arg/c.639A>G	393	P53	P53	protein_coding	synonymous_variant		1		1	0.0193023255814		1	0.0169		1	0.012	0.0120355532059		0		0	0	2.51	14.37	0.722319	benign
sa40.ATR2U	159	159	0	T/T	99.0	694	chr17	7578209	7578210	T	snp	ts	0.0378787878788	61	5	0	0	0.749086566952	TP53	6	ENST00000269305	cgA/cgG	p.Arg213Arg/c.639A>G	393	P53	P53	protein_coding	synonymous_variant		1		1	0.0193023255814		1	0.0169		1	0.012	0.0120355532059		0		0	0	2.51	14.37	0.722319	benign
y103.AUMV1	412	411	1	T/T	99.0	694	chr17	7578209	7578210	T	snp	ts	0.0378787878788	61	5	0	0	0.749086566952	TP53	6	ENST00000269305	cgA/cgG	p.Arg213Arg/c.639A>G	393	P53	P53	protein_coding	synonymous_variant		1		1	0.0193023255814		1	0.0169		1	0.012	0.0120355532059		0		0	0	2.51	14.37	0.722319	benign
y104.ATR2U	83	83	0	T/T	99.0	694	chr17	7578209	7578210	T	snp	ts	0.0378787878788	61	5	0	0	0.749086566952	TP53	6	ENST00000269305	cgA/cgG	p.Arg213Arg/c.639A>G	393	P53	P53	protein_coding	synonymous_variant		1		1	0.0193023255814		1	0.0169		1	0.012	0.0120355532059		0		0	0	2.51	14.37	0.722319	benign
y109b.AUMV1	50	50	0	T/T	99.0	694	chr17	7578209	7578210	T	snp	ts	0.0378787878788	61	5	0	0	0.749086566952	TP53	6	ENST00000269305	cgA/cgG	p.Arg213Arg/c.639A>G	393	P53	P53	protein_coding	synonymous_variant		1		1	0.0193023255814		1	0.0169		1	0.012	0.0120355532059		0		0	0	2.51	14.37	0.722319	benign
y110b.AUMV1	32	32	0	T/T	95.0	694	chr17	7578209	7578210	T	snp	ts	0.0378787878788	61	5	0	0	0.749086566952	TP53	6	ENST00000269305	cgA/cgG	p.Arg213Arg/c.639A>G	393	P53	P53	protein_coding	synonymous_variant		1		1	0.0193023255814		1	0.0169		1	0.012	0.0120355532059		0		0	0	2.51	14.37	0.722319	benign
y128b.AUMV1	255	255	0	T/T	99.0	694	chr17	7578209	7578210	T	snp	ts	0.0378787878788	61	5	0	0	0.749086566952	TP53	6	ENST00000269305	cgA/cgG	p.Arg213Arg/c.639A>G	393	P53	P53	protein_coding	synonymous_variant		1		1	0.0193023255814		1	0.0169		1	0.012	0.0120355532059		0		0	0	2.51	14.37	0.722319	benign
y132b.AUMV1	61	61	0	T/T	99.0	694	chr17	7578209	7578210	T	snp	ts	0.0378787878788	61	5	0	0	0.749086566952	TP53	6	ENST00000269305	cgA/cgG	p.Arg213Arg/c.639A>G	393	P53	P53	protein_coding	synonymous_variant		1		1	0.0193023255814		1	0.0169		1	0.012	0.0120355532059		0		0	0	2.51	14.37	0.722319	benign
y134b.AL9E5	284	284	0	T/T	99.0	694	chr17	7578209	7578210	T	snp	ts	0.0378787878788	61	5	0	0	0.749086566952	TP53	6	ENST00000269305	cgA/cgG	p.Arg213Arg/c.639A>G	393	P53	P53	protein_coding	synonymous_variant		1		1	0.0193023255814		1	0.0169		1	0.012	0.0120355532059		0		0	0	2.51	14.37	0.722319	benign
y144c.AUMV1	145	145	0	T/T	99.0	694	chr17	7578209	7578210	T	snp	ts	0.0378787878788	61	5	0	0	0.749086566952	TP53	6	ENST00000269305	cgA/cgG	p.Arg213Arg/c.639A>G	393	P53	P53	protein_coding	synonymous_variant		1		1	0.0193023255814		1	0.0169		1	0.012	0.0120355532059		0		0	0	2.51	14.37	0.722319	benign
y147c.AUMV1	349	348	1	T/T	99.0	694	chr17	7578209	7578210	T	snp	ts	0.0378787878788	61	5	0	0	0.749086566952	TP53	6	ENST00000269305	cgA/cgG	p.Arg213Arg/c.639A>G	393	P53	P53	protein_coding	synonymous_variant		1		1	0.0193023255814		1	0.0169		1	0.012	0.0120355532059		0		0	0	2.51	14.37	0.722319	benign
y162c.ATR2U	61	61	0	T/T	99.0	694	chr17	7578209	7578210	T	snp	ts	0.0378787878788	61	5	0	0	0.749086566952	TP53	6	ENST00000269305	cgA/cgG	p.Arg213Arg/c.639A>G	393	P53	P53	protein_coding	synonymous_variant		1		1	0.0193023255814		1	0.0169		1	0.012	0.0120355532059		0		0	0	2.51	14.37	0.722319	benign
y179f.AL9E5	281	280	1	T/T	99.0	694	chr17	7578209	7578210	T	snp	ts	0.0378787878788	61	5	0	0	0.749086566952	TP53	6	ENST00000269305	cgA/cgG	p.Arg213Arg/c.639A>G	393	P53	P53	protein_coding	synonymous_variant		1		1	0.0193023255814		1	0.0169		1	0.012	0.0120355532059		0		0	0	2.51	14.37	0.722319	benign
y183b.AUMV1	132	132	0	T/T	99.0	694	chr17	7578209	7578210	T	snp	ts	0.0378787878788	61	5	0	0	0.749086566952	TP53	6	ENST00000269305	cgA/cgG	p.Arg213Arg/c.639A>G	393	P53	P53	protein_coding	synonymous_variant		1		1	0.0193023255814		1	0.0169		1	0.012	0.0120355532059		0		0	0	2.51	14.37	0.722319	benign
y188b.AUMV1	120	120	0	T/T	99.0	694	chr17	7578209	7578210	T	snp	ts	0.0378787878788	61	5	0	0	0.749086566952	TP53	6	ENST00000269305	cgA/cgG	p.Arg213Arg/c.639A>G	393	P53	P53	protein_coding	synonymous_variant		1		1	0.0193023255814		1	0.0169		1	0.012	0.0120355532059		0		0	0	2.51	14.37	0.722319	benign
y199b.AL9E5	258	258	0	T/T	99.0	694	chr17	7578209	7578210	T	snp	ts	0.0378787878788	61	5	0	0	0.749086566952	TP53	6	ENST00000269305	cgA/cgG	p.Arg213Arg/c.639A>G	393	P53	P53	protein_coding	synonymous_variant		1		1	0.0193023255814		1	0.0169		1	0.012	0.0120355532059		0		0	0	2.51	14.37	0.722319	benign
y3.AUMV1	52	50	2	T/T	99.0	694	chr17	7578209	7578210	T	snp	ts	0.0378787878788	61	5	0	0	0.749086566952	TP53	6	ENST00000269305	cgA/cgG	p.Arg213Arg/c.639A>G	393	P53	P53	protein_coding	synonymous_variant		1		1	0.0193023255814		1	0.0169		1	0.012	0.0120355532059		0		0	0	2.51	14.37	0.722319	benign
y68.ATR2U	229	229	0	T/T	99.0	694	chr17	7578209	7578210	T	snp	ts	0.0378787878788	61	5	0	0	0.749086566952	TP53	6	ENST00000269305	cgA/cgG	p.Arg213Arg/c.639A>G	393	P53	P53	protein_coding	synonymous_variant		1		1	0.0193023255814		1	0.0169		1	0.012	0.0120355532059		0		0	0	2.51	14.37	0.722319	benign
y77.AL9E5	218	217	1	T/T	99.0	694	chr17	7578209	7578210	T	snp	ts	0.0378787878788	61	5	0	0	0.749086566952	TP53	6	ENST00000269305	cgA/cgG	p.Arg213Arg/c.639A>G	393	P53	P53	protein_coding	synonymous_variant		1		1	0.0193023255814		1	0.0169		1	0.012	0.0120355532059		0		0	0	2.51	14.37	0.722319	benign
y88.AUMV1	36	36	0	T/T	99.0	694	chr17	7578209	7578210	T	snp	ts	0.0378787878788	61	5	0	0	0.749086566952	TP53	6	ENST00000269305	cgA/cgG	p.Arg213Arg/c.639A>G	393	P53	P53	protein_coding	synonymous_variant		1		1	0.0193023255814		1	0.0169		1	0.012	0.0120355532059		0		0	0	2.51	14.37	0.722319	benign
63n.AUMV1	190	102	88	T/C	99.0	694	chr17	7578209	7578210	T	snp	ts	0.0378787878788	61	5	0	0	0.749086566952	TP53	6	ENST00000269305	cgA/cgG	p.Arg213Arg/c.639A>G	393	P53	P53	protein_coding	synonymous_variant		1		1	0.0193023255814		1	0.0169		1	0.012	0.0120355532059		0		0	0	2.51	14.37	0.722319	benign
82.ATR2U	338	163	175	T/C	99.0	694	chr17	7578209	7578210	T	snp	ts	0.0378787878788	61	5	0	0	0.749086566952	TP53	6	ENST00000269305	cgA/cgG	p.Arg213Arg/c.639A>G	393	P53	P53	protein_coding	synonymous_variant		1		1	0.0193023255814		1	0.0169		1	0.012	0.0120355532059		0		0	0	2.51	14.37	0.722319	benign
91n.AUMV1	93	46	47	T/C	99.0	694	chr17	7578209	7578210	T	snp	ts	0.0378787878788	61	5	0	0	0.749086566952	TP53	6	ENST00000269305	cgA/cgG	p.Arg213Arg/c.639A>G	393	P53	P53	protein_coding	synonymous_variant		1		1	0.0193023255814		1	0.0169		1	0.012	0.0120355532059		0		0	0	2.51	14.37	0.722319	benign
Y146B.A8P8B	68	30	38	T/C	99.0	694	chr17	7578209	7578210	T	snp	ts	0.0378787878788	61	5	0	0	0.749086566952	TP53	6	ENST00000269305	cgA/cgG	p.Arg213Arg/c.639A>G	393	P53	P53	protein_coding	synonymous_variant		1		1	0.0193023255814		1	0.0169		1	0.012	0.0120355532059		0		0	0	2.51	14.37	0.722319	benign
1.ATR2U	424	424	0	G/G	99.0	695	chr17	7578262	7578263	G	snp	ts	0.00757575757576	65	1	0	0	0.950550440504	TP53	6	ENST00000269305	Cga/Tga	p.Arg196*/c.586C>T	393	P53	P53	protein_coding	stop_gained		1		0	-1.0		0	-1.0		1	8.236e-06	8.24021886021e-06		0		0	0	2.41	14.02	0.722319	pathogenic
10.ATU14	212	212	0	G/G	99.0	695	chr17	7578262	7578263	G	snp	ts	0.00757575757576	65	1	0	0	0.950550440504	TP53	6	ENST00000269305	Cga/Tga	p.Arg196*/c.586C>T	393	P53	P53	protein_coding	stop_gained		1		0	-1.0		0	-1.0		1	8.236e-06	8.24021886021e-06		0		0	0	2.41	14.02	0.722319	pathogenic
17.AUMV1	282	282	0	G/G	99.0	695	chr17	7578262	7578263	G	snp	ts	0.00757575757576	65	1	0	0	0.950550440504	TP53	6	ENST00000269305	Cga/Tga	p.Arg196*/c.586C>T	393	P53	P53	protein_coding	stop_gained		1		0	-1.0		0	-1.0		1	8.236e-06	8.24021886021e-06		0		0	0	2.41	14.02	0.722319	pathogenic
2.ATR2U	698	696	2	G/G	99.0	695	chr17	7578262	7578263	G	snp	ts	0.00757575757576	65	1	0	0	0.950550440504	TP53	6	ENST00000269305	Cga/Tga	p.Arg196*/c.586C>T	393	P53	P53	protein_coding	stop_gained		1		0	-1.0		0	-1.0		1	8.236e-06	8.24021886021e-06		0		0	0	2.41	14.02	0.722319	pathogenic
21.AL9E5	40	40	0	G/G	99.0	695	chr17	7578262	7578263	G	snp	ts	0.00757575757576	65	1	0	0	0.950550440504	TP53	6	ENST00000269305	Cga/Tga	p.Arg196*/c.586C>T	393	P53	P53	protein_coding	stop_gained		1		0	-1.0		0	-1.0		1	8.236e-06	8.24021886021e-06		0		0	0	2.41	14.02	0.722319	pathogenic
22.AUMV1	421	421	0	G/G	99.0	695	chr17	7578262	7578263	G	snp	ts	0.00757575757576	65	1	0	0	0.950550440504	TP53	6	ENST00000269305	Cga/Tga	p.Arg196*/c.586C>T	393	P53	P53	protein_coding	stop_gained		1		0	-1.0		0	-1.0		1	8.236e-06	8.24021886021e-06		0		0	0	2.41	14.02	0.722319	pathogenic
31.ATU14	429	427	2	G/G	99.0	695	chr17	7578262	7578263	G	snp	ts	0.00757575757576	65	1	0	0	0.950550440504	TP53	6	ENST00000269305	Cga/Tga	p.Arg196*/c.586C>T	393	P53	P53	protein_coding	stop_gained		1		0	-1.0		0	-1.0		1	8.236e-06	8.24021886021e-06		0		0	0	2.41	14.02	0.722319	pathogenic
35.ATU14	85	85	0	G/G	99.0	695	chr17	7578262	7578263	G	snp	ts	0.00757575757576	65	1	0	0	0.950550440504	TP53	6	ENST00000269305	Cga/Tga	p.Arg196*/c.586C>T	393	P53	P53	protein_coding	stop_gained		1		0	-1.0		0	-1.0		1	8.236e-06	8.24021886021e-06		0		0	0	2.41	14.02	0.722319	pathogenic
37.ATU14	117	117	0	G/G	99.0	695	chr17	7578262	7578263	G	snp	ts	0.00757575757576	65	1	0	0	0.950550440504	TP53	6	ENST00000269305	Cga/Tga	p.Arg196*/c.586C>T	393	P53	P53	protein_coding	stop_gained		1		0	-1.0		0	-1.0		1	8.236e-06	8.24021886021e-06		0		0	0	2.41	14.02	0.722319	pathogenic
45.ATU14	161	159	2	G/G	99.0	695	chr17	7578262	7578263	G	snp	ts	0.00757575757576	65	1	0	0	0.950550440504	TP53	6	ENST00000269305	Cga/Tga	p.Arg196*/c.586C>T	393	P53	P53	protein_coding	stop_gained		1		0	-1.0		0	-1.0		1	8.236e-06	8.24021886021e-06		0		0	0	2.41	14.02	0.722319	pathogenic
5.ATR2U	608	606	2	G/G	99.0	695	chr17	7578262	7578263	G	snp	ts	0.00757575757576	65	1	0	0	0.950550440504	TP53	6	ENST00000269305	Cga/Tga	p.Arg196*/c.586C>T	393	P53	P53	protein_coding	stop_gained		1		0	-1.0		0	-1.0		1	8.236e-06	8.24021886021e-06		0		0	0	2.41	14.02	0.722319	pathogenic
63n.AUMV1	242	240	2	G/G	99.0	695	chr17	7578262	7578263	G	snp	ts	0.00757575757576	65	1	0	0	0.950550440504	TP53	6	ENST00000269305	Cga/Tga	p.Arg196*/c.586C>T	393	P53	P53	protein_coding	stop_gained		1		0	-1.0		0	-1.0		1	8.236e-06	8.24021886021e-06		0		0	0	2.41	14.02	0.722319	pathogenic
7.A8P8B	618	615	3	G/G	99.0	695	chr17	7578262	7578263	G	snp	ts	0.00757575757576	65	1	0	0	0.950550440504	TP53	6	ENST00000269305	Cga/Tga	p.Arg196*/c.586C>T	393	P53	P53	protein_coding	stop_gained		1		0	-1.0		0	-1.0		1	8.236e-06	8.24021886021e-06		0		0	0	2.41	14.02	0.722319	pathogenic
72.ATR2U	562	562	0	G/G	99.0	695	chr17	7578262	7578263	G	snp	ts	0.00757575757576	65	1	0	0	0.950550440504	TP53	6	ENST00000269305	Cga/Tga	p.Arg196*/c.586C>T	393	P53	P53	protein_coding	stop_gained		1		0	-1.0		0	-1.0		1	8.236e-06	8.24021886021e-06		0		0	0	2.41	14.02	0.722319	pathogenic
82.ATR2U	415	415	0	G/G	99.0	695	chr17	7578262	7578263	G	snp	ts	0.00757575757576	65	1	0	0	0.950550440504	TP53	6	ENST00000269305	Cga/Tga	p.Arg196*/c.586C>T	393	P53	P53	protein_coding	stop_gained		1		0	-1.0		0	-1.0		1	8.236e-06	8.24021886021e-06		0		0	0	2.41	14.02	0.722319	pathogenic
84.ATR2U	484	484	0	G/G	99.0	695	chr17	7578262	7578263	G	snp	ts	0.00757575757576	65	1	0	0	0.950550440504	TP53	6	ENST00000269305	Cga/Tga	p.Arg196*/c.586C>T	393	P53	P53	protein_coding	stop_gained		1		0	-1.0		0	-1.0		1	8.236e-06	8.24021886021e-06		0		0	0	2.41	14.02	0.722319	pathogenic
91n.AUMV1	130	129	1	G/G	99.0	695	chr17	7578262	7578263	G	snp	ts	0.00757575757576	65	1	0	0	0.950550440504	TP53	6	ENST00000269305	Cga/Tga	p.Arg196*/c.586C>T	393	P53	P53	protein_coding	stop_gained		1		0	-1.0		0	-1.0		1	8.236e-06	8.24021886021e-06		0		0	0	2.41	14.02	0.722319	pathogenic
BS2.ATU14	53	53	0	G/G	99.0	695	chr17	7578262	7578263	G	snp	ts	0.00757575757576	65	1	0	0	0.950550440504	TP53	6	ENST00000269305	Cga/Tga	p.Arg196*/c.586C>T	393	P53	P53	protein_coding	stop_gained		1		0	-1.0		0	-1.0		1	8.236e-06	8.24021886021e-06		0		0	0	2.41	14.02	0.722319	pathogenic
PS1.A8P8B	282	282	0	G/G	99.0	695	chr17	7578262	7578263	G	snp	ts	0.00757575757576	65	1	0	0	0.950550440504	TP53	6	ENST00000269305	Cga/Tga	p.Arg196*/c.586C>T	393	P53	P53	protein_coding	stop_gained		1		0	-1.0		0	-1.0		1	8.236e-06	8.24021886021e-06		0		0	0	2.41	14.02	0.722319	pathogenic
PS2.A8P8B	247	247	0	G/G	99.0	695	chr17	7578262	7578263	G	snp	ts	0.00757575757576	65	1	0	0	0.950550440504	TP53	6	ENST00000269305	Cga/Tga	p.Arg196*/c.586C>T	393	P53	P53	protein_coding	stop_gained		1		0	-1.0		0	-1.0		1	8.236e-06	8.24021886021e-06		0		0	0	2.41	14.02	0.722319	pathogenic
SA23.ATU14	122	122	0	G/G	99.0	695	chr17	7578262	7578263	G	snp	ts	0.00757575757576	65	1	0	0	0.950550440504	TP53	6	ENST00000269305	Cga/Tga	p.Arg196*/c.586C>T	393	P53	P53	protein_coding	stop_gained		1		0	-1.0		0	-1.0		1	8.236e-06	8.24021886021e-06		0		0	0	2.41	14.02	0.722319	pathogenic
SA33.ATU14	12	12	0	G/G	30.0	695	chr17	7578262	7578263	G	snp	ts	0.00757575757576	65	1	0	0	0.950550440504	TP53	6	ENST00000269305	Cga/Tga	p.Arg196*/c.586C>T	393	P53	P53	protein_coding	stop_gained		1		0	-1.0		0	-1.0		1	8.236e-06	8.24021886021e-06		0		0	0	2.41	14.02	0.722319	pathogenic
SA36.A8P8B	103	103	0	G/G	99.0	695	chr17	7578262	7578263	G	snp	ts	0.00757575757576	65	1	0	0	0.950550440504	TP53	6	ENST00000269305	Cga/Tga	p.Arg196*/c.586C>T	393	P53	P53	protein_coding	stop_gained		1		0	-1.0		0	-1.0		1	8.236e-06	8.24021886021e-06		0		0	0	2.41	14.02	0.722319	pathogenic
SA38.ATU14	36	36	0	G/G	93.0	695	chr17	7578262	7578263	G	snp	ts	0.00757575757576	65	1	0	0	0.950550440504	TP53	6	ENST00000269305	Cga/Tga	p.Arg196*/c.586C>T	393	P53	P53	protein_coding	stop_gained		1		0	-1.0		0	-1.0		1	8.236e-06	8.24021886021e-06		0		0	0	2.41	14.02	0.722319	pathogenic
SA41.ATU14	219	219	0	G/G	99.0	695	chr17	7578262	7578263	G	snp	ts	0.00757575757576	65	1	0	0	0.950550440504	TP53	6	ENST00000269305	Cga/Tga	p.Arg196*/c.586C>T	393	P53	P53	protein_coding	stop_gained		1		0	-1.0		0	-1.0		1	8.236e-06	8.24021886021e-06		0		0	0	2.41	14.02	0.722319	pathogenic
Y102.ATU14	56	56	0	G/G	99.0	695	chr17	7578262	7578263	G	snp	ts	0.00757575757576	65	1	0	0	0.950550440504	TP53	6	ENST00000269305	Cga/Tga	p.Arg196*/c.586C>T	393	P53	P53	protein_coding	stop_gained		1		0	-1.0		0	-1.0		1	8.236e-06	8.24021886021e-06		0		0	0	2.41	14.02	0.722319	pathogenic
Y105.ATU14	58	58	0	G/G	99.0	695	chr17	7578262	7578263	G	snp	ts	0.00757575757576	65	1	0	0	0.950550440504	TP53	6	ENST00000269305	Cga/Tga	p.Arg196*/c.586C>T	393	P53	P53	protein_coding	stop_gained		1		0	-1.0		0	-1.0		1	8.236e-06	8.24021886021e-06		0		0	0	2.41	14.02	0.722319	pathogenic
Y115B.ATU14	247	245	2	G/G	99.0	695	chr17	7578262	7578263	G	snp	ts	0.00757575757576	65	1	0	0	0.950550440504	TP53	6	ENST00000269305	Cga/Tga	p.Arg196*/c.586C>T	393	P53	P53	protein_coding	stop_gained		1		0	-1.0		0	-1.0		1	8.236e-06	8.24021886021e-06		0		0	0	2.41	14.02	0.722319	pathogenic
Y123B.ATU14	210	209	1	G/G	99.0	695	chr17	7578262	7578263	G	snp	ts	0.00757575757576	65	1	0	0	0.950550440504	TP53	6	ENST00000269305	Cga/Tga	p.Arg196*/c.586C>T	393	P53	P53	protein_coding	stop_gained		1		0	-1.0		0	-1.0		1	8.236e-06	8.24021886021e-06		0		0	0	2.41	14.02	0.722319	pathogenic
Y135.ATU14	515	515	0	G/G	99.0	695	chr17	7578262	7578263	G	snp	ts	0.00757575757576	65	1	0	0	0.950550440504	TP53	6	ENST00000269305	Cga/Tga	p.Arg196*/c.586C>T	393	P53	P53	protein_coding	stop_gained		1		0	-1.0		0	-1.0		1	8.236e-06	8.24021886021e-06		0		0	0	2.41	14.02	0.722319	pathogenic
Y137B.ATU14	147	146	1	G/G	99.0	695	chr17	7578262	7578263	G	snp	ts	0.00757575757576	65	1	0	0	0.950550440504	TP53	6	ENST00000269305	Cga/Tga	p.Arg196*/c.586C>T	393	P53	P53	protein_coding	stop_gained		1		0	-1.0		0	-1.0		1	8.236e-06	8.24021886021e-06		0		0	0	2.41	14.02	0.722319	pathogenic
Y143C.ATU14	93	93	0	G/G	99.0	695	chr17	7578262	7578263	G	snp	ts	0.00757575757576	65	1	0	0	0.950550440504	TP53	6	ENST00000269305	Cga/Tga	p.Arg196*/c.586C>T	393	P53	P53	protein_coding	stop_gained		1		0	-1.0		0	-1.0		1	8.236e-06	8.24021886021e-06		0		0	0	2.41	14.02	0.722319	pathogenic
Y145B.ATU14	758	758	0	G/G	99.0	695	chr17	7578262	7578263	G	snp	ts	0.00757575757576	65	1	0	0	0.950550440504	TP53	6	ENST00000269305	Cga/Tga	p.Arg196*/c.586C>T	393	P53	P53	protein_coding	stop_gained		1		0	-1.0		0	-1.0		1	8.236e-06	8.24021886021e-06		0		0	0	2.41	14.02	0.722319	pathogenic
Y146B.A8P8B	111	111	0	G/G	99.0	695	chr17	7578262	7578263	G	snp	ts	0.00757575757576	65	1	0	0	0.950550440504	TP53	6	ENST00000269305	Cga/Tga	p.Arg196*/c.586C>T	393	P53	P53	protein_coding	stop_gained		1		0	-1.0		0	-1.0		1	8.236e-06	8.24021886021e-06		0		0	0	2.41	14.02	0.722319	pathogenic
Y151B.ATU14	64	64	0	G/G	99.0	695	chr17	7578262	7578263	G	snp	ts	0.00757575757576	65	1	0	0	0.950550440504	TP53	6	ENST00000269305	Cga/Tga	p.Arg196*/c.586C>T	393	P53	P53	protein_coding	stop_gained		1		0	-1.0		0	-1.0		1	8.236e-06	8.24021886021e-06		0		0	0	2.41	14.02	0.722319	pathogenic
Y159C.ATU14	108	108	0	G/G	99.0	695	chr17	7578262	7578263	G	snp	ts	0.00757575757576	65	1	0	0	0.950550440504	TP53	6	ENST00000269305	Cga/Tga	p.Arg196*/c.586C>T	393	P53	P53	protein_coding	stop_gained		1		0	-1.0		0	-1.0		1	8.236e-06	8.24021886021e-06		0		0	0	2.41	14.02	0.722319	pathogenic
Y161C.ATU14	33	33	0	G/G	93.0	695	chr17	7578262	7578263	G	snp	ts	0.00757575757576	65	1	0	0	0.950550440504	TP53	6	ENST00000269305	Cga/Tga	p.Arg196*/c.586C>T	393	P53	P53	protein_coding	stop_gained		1		0	-1.0		0	-1.0		1	8.236e-06	8.24021886021e-06		0		0	0	2.41	14.02	0.722319	pathogenic
Y165B.ATU14	183	182	1	G/G	99.0	695	chr17	7578262	7578263	G	snp	ts	0.00757575757576	65	1	0	0	0.950550440504	TP53	6	ENST00000269305	Cga/Tga	p.Arg196*/c.586C>T	393	P53	P53	protein_coding	stop_gained		1		0	-1.0		0	-1.0		1	8.236e-06	8.24021886021e-06		0		0	0	2.41	14.02	0.722319	pathogenic
Y167B.A8P8B	167	163	4	G/G	99.0	695	chr17	7578262	7578263	G	snp	ts	0.00757575757576	65	1	0	0	0.950550440504	TP53	6	ENST00000269305	Cga/Tga	p.Arg196*/c.586C>T	393	P53	P53	protein_coding	stop_gained		1		0	-1.0		0	-1.0		1	8.236e-06	8.24021886021e-06		0		0	0	2.41	14.02	0.722319	pathogenic
Y168C.A8P8B	33	33	0	G/G	99.0	695	chr17	7578262	7578263	G	snp	ts	0.00757575757576	65	1	0	0	0.950550440504	TP53	6	ENST00000269305	Cga/Tga	p.Arg196*/c.586C>T	393	P53	P53	protein_coding	stop_gained		1		0	-1.0		0	-1.0		1	8.236e-06	8.24021886021e-06		0		0	0	2.41	14.02	0.722319	pathogenic
Y169C.ATU14	86	86	0	G/G	99.0	695	chr17	7578262	7578263	G	snp	ts	0.00757575757576	65	1	0	0	0.950550440504	TP53	6	ENST00000269305	Cga/Tga	p.Arg196*/c.586C>T	393	P53	P53	protein_coding	stop_gained		1		0	-1.0		0	-1.0		1	8.236e-06	8.24021886021e-06		0		0	0	2.41	14.02	0.722319	pathogenic
ps4.AL9E5	235	235	0	G/G	99.0	695	chr17	7578262	7578263	G	snp	ts	0.00757575757576	65	1	0	0	0.950550440504	TP53	6	ENST00000269305	Cga/Tga	p.Arg196*/c.586C>T	393	P53	P53	protein_coding	stop_gained		1		0	-1.0		0	-1.0		1	8.236e-06	8.24021886021e-06		0		0	0	2.41	14.02	0.722319	pathogenic
ps6.AUMV1	132	132	0	G/G	99.0	695	chr17	7578262	7578263	G	snp	ts	0.00757575757576	65	1	0	0	0.950550440504	TP53	6	ENST00000269305	Cga/Tga	p.Arg196*/c.586C>T	393	P53	P53	protein_coding	stop_gained		1		0	-1.0		0	-1.0		1	8.236e-06	8.24021886021e-06		0		0	0	2.41	14.02	0.722319	pathogenic
sa14.AL9E5	349	349	0	G/G	99.0	695	chr17	7578262	7578263	G	snp	ts	0.00757575757576	65	1	0	0	0.950550440504	TP53	6	ENST00000269305	Cga/Tga	p.Arg196*/c.586C>T	393	P53	P53	protein_coding	stop_gained		1		0	-1.0		0	-1.0		1	8.236e-06	8.24021886021e-06		0		0	0	2.41	14.02	0.722319	pathogenic
sa39.AL9E5	56	56	0	G/G	99.0	695	chr17	7578262	7578263	G	snp	ts	0.00757575757576	65	1	0	0	0.950550440504	TP53	6	ENST00000269305	Cga/Tga	p.Arg196*/c.586C>T	393	P53	P53	protein_coding	stop_gained		1		0	-1.0		0	-1.0		1	8.236e-06	8.24021886021e-06		0		0	0	2.41	14.02	0.722319	pathogenic
sa40.ATR2U	189	189	0	G/G	99.0	695	chr17	7578262	7578263	G	snp	ts	0.00757575757576	65	1	0	0	0.950550440504	TP53	6	ENST00000269305	Cga/Tga	p.Arg196*/c.586C>T	393	P53	P53	protein_coding	stop_gained		1		0	-1.0		0	-1.0		1	8.236e-06	8.24021886021e-06		0		0	0	2.41	14.02	0.722319	pathogenic
y103.AUMV1	541	540	1	G/G	99.0	695	chr17	7578262	7578263	G	snp	ts	0.00757575757576	65	1	0	0	0.950550440504	TP53	6	ENST00000269305	Cga/Tga	p.Arg196*/c.586C>T	393	P53	P53	protein_coding	stop_gained		1		0	-1.0		0	-1.0		1	8.236e-06	8.24021886021e-06		0		0	0	2.41	14.02	0.722319	pathogenic
y104.ATR2U	100	99	1	G/G	99.0	695	chr17	7578262	7578263	G	snp	ts	0.00757575757576	65	1	0	0	0.950550440504	TP53	6	ENST00000269305	Cga/Tga	p.Arg196*/c.586C>T	393	P53	P53	protein_coding	stop_gained		1		0	-1.0		0	-1.0		1	8.236e-06	8.24021886021e-06		0		0	0	2.41	14.02	0.722319	pathogenic
y109b.AUMV1	59	59	0	G/G	99.0	695	chr17	7578262	7578263	G	snp	ts	0.00757575757576	65	1	0	0	0.950550440504	TP53	6	ENST00000269305	Cga/Tga	p.Arg196*/c.586C>T	393	P53	P53	protein_coding	stop_gained		1		0	-1.0		0	-1.0		1	8.236e-06	8.24021886021e-06		0		0	0	2.41	14.02	0.722319	pathogenic
y110b.AUMV1	38	38	0	G/G	99.0	695	chr17	7578262	7578263	G	snp	ts	0.00757575757576	65	1	0	0	0.950550440504	TP53	6	ENST00000269305	Cga/Tga	p.Arg196*/c.586C>T	393	P53	P53	protein_coding	stop_gained		1		0	-1.0		0	-1.0		1	8.236e-06	8.24021886021e-06		0		0	0	2.41	14.02	0.722319	pathogenic
y128b.AUMV1	333	330	3	G/G	99.0	695	chr17	7578262	7578263	G	snp	ts	0.00757575757576	65	1	0	0	0.950550440504	TP53	6	ENST00000269305	Cga/Tga	p.Arg196*/c.586C>T	393	P53	P53	protein_coding	stop_gained		1		0	-1.0		0	-1.0		1	8.236e-06	8.24021886021e-06		0		0	0	2.41	14.02	0.722319	pathogenic
y132b.AUMV1	67	67	0	G/G	99.0	695	chr17	7578262	7578263	G	snp	ts	0.00757575757576	65	1	0	0	0.950550440504	TP53	6	ENST00000269305	Cga/Tga	p.Arg196*/c.586C>T	393	P53	P53	protein_coding	stop_gained		1		0	-1.0		0	-1.0		1	8.236e-06	8.24021886021e-06		0		0	0	2.41	14.02	0.722319	pathogenic
y134b.AL9E5	347	346	1	G/G	99.0	695	chr17	7578262	7578263	G	snp	ts	0.00757575757576	65	1	0	0	0.950550440504	TP53	6	ENST00000269305	Cga/Tga	p.Arg196*/c.586C>T	393	P53	P53	protein_coding	stop_gained		1		0	-1.0		0	-1.0		1	8.236e-06	8.24021886021e-06		0		0	0	2.41	14.02	0.722319	pathogenic
y144c.AUMV1	185	184	1	G/G	99.0	695	chr17	7578262	7578263	G	snp	ts	0.00757575757576	65	1	0	0	0.950550440504	TP53	6	ENST00000269305	Cga/Tga	p.Arg196*/c.586C>T	393	P53	P53	protein_coding	stop_gained		1		0	-1.0		0	-1.0		1	8.236e-06	8.24021886021e-06		0		0	0	2.41	14.02	0.722319	pathogenic
y147c.AUMV1	433	433	0	G/G	99.0	695	chr17	7578262	7578263	G	snp	ts	0.00757575757576	65	1	0	0	0.950550440504	TP53	6	ENST00000269305	Cga/Tga	p.Arg196*/c.586C>T	393	P53	P53	protein_coding	stop_gained		1		0	-1.0		0	-1.0		1	8.236e-06	8.24021886021e-06		0		0	0	2.41	14.02	0.722319	pathogenic
y162c.ATR2U	70	70	0	G/G	99.0	695	chr17	7578262	7578263	G	snp	ts	0.00757575757576	65	1	0	0	0.950550440504	TP53	6	ENST00000269305	Cga/Tga	p.Arg196*/c.586C>T	393	P53	P53	protein_coding	stop_gained		1		0	-1.0		0	-1.0		1	8.236e-06	8.24021886021e-06		0		0	0	2.41	14.02	0.722319	pathogenic
y179f.AL9E5	370	369	1	G/G	99.0	695	chr17	7578262	7578263	G	snp	ts	0.00757575757576	65	1	0	0	0.950550440504	TP53	6	ENST00000269305	Cga/Tga	p.Arg196*/c.586C>T	393	P53	P53	protein_coding	stop_gained		1		0	-1.0		0	-1.0		1	8.236e-06	8.24021886021e-06		0		0	0	2.41	14.02	0.722319	pathogenic
y183b.AUMV1	143	143	0	G/G	99.0	695	chr17	7578262	7578263	G	snp	ts	0.00757575757576	65	1	0	0	0.950550440504	TP53	6	ENST00000269305	Cga/Tga	p.Arg196*/c.586C>T	393	P53	P53	protein_coding	stop_gained		1		0	-1.0		0	-1.0		1	8.236e-06	8.24021886021e-06		0		0	0	2.41	14.02	0.722319	pathogenic
y188b.AUMV1	144	144	0	G/G	99.0	695	chr17	7578262	7578263	G	snp	ts	0.00757575757576	65	1	0	0	0.950550440504	TP53	6	ENST00000269305	Cga/Tga	p.Arg196*/c.586C>T	393	P53	P53	protein_coding	stop_gained		1		0	-1.0		0	-1.0		1	8.236e-06	8.24021886021e-06		0		0	0	2.41	14.02	0.722319	pathogenic
y199b.AL9E5	305	305	0	G/G	99.0	695	chr17	7578262	7578263	G	snp	ts	0.00757575757576	65	1	0	0	0.950550440504	TP53	6	ENST00000269305	Cga/Tga	p.Arg196*/c.586C>T	393	P53	P53	protein_coding	stop_gained		1		0	-1.0		0	-1.0		1	8.236e-06	8.24021886021e-06		0		0	0	2.41	14.02	0.722319	pathogenic
y3.AUMV1	83	83	0	G/G	99.0	695	chr17	7578262	7578263	G	snp	ts	0.00757575757576	65	1	0	0	0.950550440504	TP53	6	ENST00000269305	Cga/Tga	p.Arg196*/c.586C>T	393	P53	P53	protein_coding	stop_gained		1		0	-1.0		0	-1.0		1	8.236e-06	8.24021886021e-06		0		0	0	2.41	14.02	0.722319	pathogenic
y68.ATR2U	264	262	2	G/G	99.0	695	chr17	7578262	7578263	G	snp	ts	0.00757575757576	65	1	0	0	0.950550440504	TP53	6	ENST00000269305	Cga/Tga	p.Arg196*/c.586C>T	393	P53	P53	protein_coding	stop_gained		1		0	-1.0		0	-1.0		1	8.236e-06	8.24021886021e-06		0		0	0	2.41	14.02	0.722319	pathogenic
y77.AL9E5	223	223	0	G/G	99.0	695	chr17	7578262	7578263	G	snp	ts	0.00757575757576	65	1	0	0	0.950550440504	TP53	6	ENST00000269305	Cga/Tga	p.Arg196*/c.586C>T	393	P53	P53	protein_coding	stop_gained		1		0	-1.0		0	-1.0		1	8.236e-06	8.24021886021e-06		0		0	0	2.41	14.02	0.722319	pathogenic
y88.AUMV1	41	38	3	G/G	36.0	695	chr17	7578262	7578263	G	snp	ts	0.00757575757576	65	1	0	0	0.950550440504	TP53	6	ENST00000269305	Cga/Tga	p.Arg196*/c.586C>T	393	P53	P53	protein_coding	stop_gained		1		0	-1.0		0	-1.0		1	8.236e-06	8.24021886021e-06		0		0	0	2.41	14.02	0.722319	pathogenic
26.ATU14	289	248	41	G/A	99.0	695	chr17	7578262	7578263	G	snp	ts	0.00757575757576	65	1	0	0	0.950550440504	TP53	6	ENST00000269305	Cga/Tga	p.Arg196*/c.586C>T	393	P53	P53	protein_coding	stop_gained		1		0	-1.0		0	-1.0		1	8.236e-06	8.24021886021e-06		0		0	0	2.41	14.02	0.722319	pathogenic
37.ATU14	83	80	3	G/G	99.0	696	chr17	7579471	7579472	G	snp	tv	0.669230769231	9	25	31	1	0.28998347925	TP53	4	ENST00000269305	cCc/cGc	p.Pro72Arg/c.215C>G	393	None	protein_coding	missense_variant	MED	1	rs1042522	1	0.74523255814	0.630036911719	1	0.7147	0.542931	1	0.659	0.65995997486	0.734480897259	1	None	0	0	0.82	8.32	0.722319	uncertain	benign
PS1.A8P8B	86	86	0	G/G	99.0	696	chr17	7579471	7579472	G	snp	tv	0.669230769231	9	25	31	1	0.28998347925	TP53	4	ENST00000269305	cCc/cGc	p.Pro72Arg/c.215C>G	393	None	protein_coding	missense_variant	MED	1	rs1042522	1	0.74523255814	0.630036911719	1	0.7147	0.542931	1	0.659	0.65995997486	0.734480897259	1	None	0	0	0.82	8.32	0.722319	uncertain	benign
SA33.ATU14	9	9	0	G/G	27.0	696	chr17	7579471	7579472	G	snp	tv	0.669230769231	9	25	31	1	0.28998347925	TP53	4	ENST00000269305	cCc/cGc	p.Pro72Arg/c.215C>G	393	None	protein_coding	missense_variant	MED	1	rs1042522	1	0.74523255814	0.630036911719	1	0.7147	0.542931	1	0.659	0.65995997486	0.734480897259	1	None	0	0	0.82	8.32	0.722319	uncertain	benign
SA36.A8P8B	24	22	2	G/G	27.0	696	chr17	7579471	7579472	G	snp	tv	0.669230769231	9	25	31	1	0.28998347925	TP53	4	ENST00000269305	cCc/cGc	p.Pro72Arg/c.215C>G	393	None	protein_coding	missense_variant	MED	1	rs1042522	1	0.74523255814	0.630036911719	1	0.7147	0.542931	1	0.659	0.65995997486	0.734480897259	1	None	0	0	0.82	8.32	0.722319	uncertain	benign
Y168C.A8P8B	17	17	0	G/G	51.0	696	chr17	7579471	7579472	G	snp	tv	0.669230769231	9	25	31	1	0.28998347925	TP53	4	ENST00000269305	cCc/cGc	p.Pro72Arg/c.215C>G	393	None	protein_coding	missense_variant	MED	1	rs1042522	1	0.74523255814	0.630036911719	1	0.7147	0.542931	1	0.659	0.65995997486	0.734480897259	1	None	0	0	0.82	8.32	0.722319	uncertain	benign
sa40.ATR2U	103	103	0	G/G	99.0	696	chr17	7579471	7579472	G	snp	tv	0.669230769231	9	25	31	1	0.28998347925	TP53	4	ENST00000269305	cCc/cGc	p.Pro72Arg/c.215C>G	393	None	protein_coding	missense_variant	MED	1	rs1042522	1	0.74523255814	0.630036911719	1	0.7147	0.542931	1	0.659	0.65995997486	0.734480897259	1	None	0	0	0.82	8.32	0.722319	uncertain	benign
y147c.AUMV1	232	232	0	G/G	99.0	696	chr17	7579471	7579472	G	snp	tv	0.669230769231	9	25	31	1	0.28998347925	TP53	4	ENST00000269305	cCc/cGc	p.Pro72Arg/c.215C>G	393	None	protein_coding	missense_variant	MED	1	rs1042522	1	0.74523255814	0.630036911719	1	0.7147	0.542931	1	0.659	0.65995997486	0.734480897259	1	None	0	0	0.82	8.32	0.722319	uncertain	benign
y77.AL9E5	85	83	2	G/G	99.0	696	chr17	7579471	7579472	G	snp	tv	0.669230769231	9	25	31	1	0.28998347925	TP53	4	ENST00000269305	cCc/cGc	p.Pro72Arg/c.215C>G	393	None	protein_coding	missense_variant	MED	1	rs1042522	1	0.74523255814	0.630036911719	1	0.7147	0.542931	1	0.659	0.65995997486	0.734480897259	1	None	0	0	0.82	8.32	0.722319	uncertain	benign
10.ATU14	86	44	42	G/C	99.0	696	chr17	7579471	7579472	G	snp	tv	0.669230769231	9	25	31	1	0.28998347925	TP53	4	ENST00000269305	cCc/cGc	p.Pro72Arg/c.215C>G	393	None	protein_coding	missense_variant	MED	1	rs1042522	1	0.74523255814	0.630036911719	1	0.7147	0.542931	1	0.659	0.65995997486	0.734480897259	1	None	0	0	0.82	8.32	0.722319	uncertain	benign
17.AUMV1	152	87	65	G/C	99.0	696	chr17	7579471	7579472	G	snp	tv	0.669230769231	9	25	31	1	0.28998347925	TP53	4	ENST00000269305	cCc/cGc	p.Pro72Arg/c.215C>G	393	None	protein_coding	missense_variant	MED	1	rs1042522	1	0.74523255814	0.630036911719	1	0.7147	0.542931	1	0.659	0.65995997486	0.734480897259	1	None	0	0	0.82	8.32	0.722319	uncertain	benign
2.ATR2U	385	209	176	G/C	99.0	696	chr17	7579471	7579472	G	snp	tv	0.669230769231	9	25	31	1	0.28998347925	TP53	4	ENST00000269305	cCc/cGc	p.Pro72Arg/c.215C>G	393	None	protein_coding	missense_variant	MED	1	rs1042522	1	0.74523255814	0.630036911719	1	0.7147	0.542931	1	0.659	0.65995997486	0.734480897259	1	None	0	0	0.82	8.32	0.722319	uncertain	benign
21.AL9E5	16	4	12	G/C	57.0	696	chr17	7579471	7579472	G	snp	tv	0.669230769231	9	25	31	1	0.28998347925	TP53	4	ENST00000269305	cCc/cGc	p.Pro72Arg/c.215C>G	393	None	protein_coding	missense_variant	MED	1	rs1042522	1	0.74523255814	0.630036911719	1	0.7147	0.542931	1	0.659	0.65995997486	0.734480897259	1	None	0	0	0.82	8.32	0.722319	uncertain	benign
31.ATU14	191	90	101	G/C	99.0	696	chr17	7579471	7579472	G	snp	tv	0.669230769231	9	25	31	1	0.28998347925	TP53	4	ENST00000269305	cCc/cGc	p.Pro72Arg/c.215C>G	393	None	protein_coding	missense_variant	MED	1	rs1042522	1	0.74523255814	0.630036911719	1	0.7147	0.542931	1	0.659	0.65995997486	0.734480897259	1	None	0	0	0.82	8.32	0.722319	uncertain	benign
35.ATU14	39	26	13	G/C	99.0	696	chr17	7579471	7579472	G	snp	tv	0.669230769231	9	25	31	1	0.28998347925	TP53	4	ENST00000269305	cCc/cGc	p.Pro72Arg/c.215C>G	393	None	protein_coding	missense_variant	MED	1	rs1042522	1	0.74523255814	0.630036911719	1	0.7147	0.542931	1	0.659	0.65995997486	0.734480897259	1	None	0	0	0.82	8.32	0.722319	uncertain	benign
45.ATU14	94	45	49	G/C	99.0	696	chr17	7579471	7579472	G	snp	tv	0.669230769231	9	25	31	1	0.28998347925	TP53	4	ENST00000269305	cCc/cGc	p.Pro72Arg/c.215C>G	393	None	protein_coding	missense_variant	MED	1	rs1042522	1	0.74523255814	0.630036911719	1	0.7147	0.542931	1	0.659	0.65995997486	0.734480897259	1	None	0	0	0.82	8.32	0.722319	uncertain	benign
72.ATR2U	297	158	139	G/C	99.0	696	chr17	7579471	7579472	G	snp	tv	0.669230769231	9	25	31	1	0.28998347925	TP53	4	ENST00000269305	cCc/cGc	p.Pro72Arg/c.215C>G	393	None	protein_coding	missense_variant	MED	1	rs1042522	1	0.74523255814	0.630036911719	1	0.7147	0.542931	1	0.659	0.65995997486	0.734480897259	1	None	0	0	0.82	8.32	0.722319	uncertain	benign
82.ATR2U	171	87	84	G/C	99.0	696	chr17	7579471	7579472	G	snp	tv	0.669230769231	9	25	31	1	0.28998347925	TP53	4	ENST00000269305	cCc/cGc	p.Pro72Arg/c.215C>G	393	None	protein_coding	missense_variant	MED	1	rs1042522	1	0.74523255814	0.630036911719	1	0.7147	0.542931	1	0.659	0.65995997486	0.734480897259	1	None	0	0	0.82	8.32	0.722319	uncertain	benign
84.ATR2U	245	133	112	G/C	99.0	696	chr17	7579471	7579472	G	snp	tv	0.669230769231	9	25	31	1	0.28998347925	TP53	4	ENST00000269305	cCc/cGc	p.Pro72Arg/c.215C>G	393	None	protein_coding	missense_variant	MED	1	rs1042522	1	0.74523255814	0.630036911719	1	0.7147	0.542931	1	0.659	0.65995997486	0.734480897259	1	None	0	0	0.82	8.32	0.722319	uncertain	benign
91n.AUMV1	30	14	16	G/C	99.0	696	chr17	7579471	7579472	G	snp	tv	0.669230769231	9	25	31	1	0.28998347925	TP53	4	ENST00000269305	cCc/cGc	p.Pro72Arg/c.215C>G	393	None	protein_coding	missense_variant	MED	1	rs1042522	1	0.74523255814	0.630036911719	1	0.7147	0.542931	1	0.659	0.65995997486	0.734480897259	1	None	0	0	0.82	8.32	0.722319	uncertain	benign
SA38.ATU14	22	5	17	G/C	62.0	696	chr17	7579471	7579472	G	snp	tv	0.669230769231	9	25	31	1	0.28998347925	TP53	4	ENST00000269305	cCc/cGc	p.Pro72Arg/c.215C>G	393	None	protein_coding	missense_variant	MED	1	rs1042522	1	0.74523255814	0.630036911719	1	0.7147	0.542931	1	0.659	0.65995997486	0.734480897259	1	None	0	0	0.82	8.32	0.722319	uncertain	benign
SA41.ATU14	116	62	54	G/C	99.0	696	chr17	7579471	7579472	G	snp	tv	0.669230769231	9	25	31	1	0.28998347925	TP53	4	ENST00000269305	cCc/cGc	p.Pro72Arg/c.215C>G	393	None	protein_coding	missense_variant	MED	1	rs1042522	1	0.74523255814	0.630036911719	1	0.7147	0.542931	1	0.659	0.65995997486	0.734480897259	1	None	0	0	0.82	8.32	0.722319	uncertain	benign
Y102.ATU14	41	18	23	G/C	99.0	696	chr17	7579471	7579472	G	snp	tv	0.669230769231	9	25	31	1	0.28998347925	TP53	4	ENST00000269305	cCc/cGc	p.Pro72Arg/c.215C>G	393	None	protein_coding	missense_variant	MED	1	rs1042522	1	0.74523255814	0.630036911719	1	0.7147	0.542931	1	0.659	0.65995997486	0.734480897259	1	None	0	0	0.82	8.32	0.722319	uncertain	benign
Y115B.ATU14	114	51	63	G/C	99.0	696	chr17	7579471	7579472	G	snp	tv	0.669230769231	9	25	31	1	0.28998347925	TP53	4	ENST00000269305	cCc/cGc	p.Pro72Arg/c.215C>G	393	None	protein_coding	missense_variant	MED	1	rs1042522	1	0.74523255814	0.630036911719	1	0.7147	0.542931	1	0.659	0.65995997486	0.734480897259	1	None	0	0	0.82	8.32	0.722319	uncertain	benign
Y123B.ATU14	145	52	93	G/C	99.0	696	chr17	7579471	7579472	G	snp	tv	0.669230769231	9	25	31	1	0.28998347925	TP53	4	ENST00000269305	cCc/cGc	p.Pro72Arg/c.215C>G	393	None	protein_coding	missense_variant	MED	1	rs1042522	1	0.74523255814	0.630036911719	1	0.7147	0.542931	1	0.659	0.65995997486	0.734480897259	1	None	0	0	0.82	8.32	0.722319	uncertain	benign
Y143C.ATU14	52	24	28	G/C	99.0	696	chr17	7579471	7579472	G	snp	tv	0.669230769231	9	25	31	1	0.28998347925	TP53	4	ENST00000269305	cCc/cGc	p.Pro72Arg/c.215C>G	393	None	protein_coding	missense_variant	MED	1	rs1042522	1	0.74523255814	0.630036911719	1	0.7147	0.542931	1	0.659	0.65995997486	0.734480897259	1	None	0	0	0.82	8.32	0.722319	uncertain	benign
Y145B.ATU14	375	194	181	G/C	99.0	696	chr17	7579471	7579472	G	snp	tv	0.669230769231	9	25	31	1	0.28998347925	TP53	4	ENST00000269305	cCc/cGc	p.Pro72Arg/c.215C>G	393	None	protein_coding	missense_variant	MED	1	rs1042522	1	0.74523255814	0.630036911719	1	0.7147	0.542931	1	0.659	0.65995997486	0.734480897259	1	None	0	0	0.82	8.32	0.722319	uncertain	benign
Y151B.ATU14	56	33	23	G/C	99.0	696	chr17	7579471	7579472	G	snp	tv	0.669230769231	9	25	31	1	0.28998347925	TP53	4	ENST00000269305	cCc/cGc	p.Pro72Arg/c.215C>G	393	None	protein_coding	missense_variant	MED	1	rs1042522	1	0.74523255814	0.630036911719	1	0.7147	0.542931	1	0.659	0.65995997486	0.734480897259	1	None	0	0	0.82	8.32	0.722319	uncertain	benign
Y159C.ATU14	32	16	16	G/C	99.0	696	chr17	7579471	7579472	G	snp	tv	0.669230769231	9	25	31	1	0.28998347925	TP53	4	ENST00000269305	cCc/cGc	p.Pro72Arg/c.215C>G	393	None	protein_coding	missense_variant	MED	1	rs1042522	1	0.74523255814	0.630036911719	1	0.7147	0.542931	1	0.659	0.65995997486	0.734480897259	1	None	0	0	0.82	8.32	0.722319	uncertain	benign
Y165B.ATU14	130	51	79	G/C	99.0	696	chr17	7579471	7579472	G	snp	tv	0.669230769231	9	25	31	1	0.28998347925	TP53	4	ENST00000269305	cCc/cGc	p.Pro72Arg/c.215C>G	393	None	protein_coding	missense_variant	MED	1	rs1042522	1	0.74523255814	0.630036911719	1	0.7147	0.542931	1	0.659	0.65995997486	0.734480897259	1	None	0	0	0.82	8.32	0.722319	uncertain	benign
Y169C.ATU14	59	28	31	G/C	99.0	696	chr17	7579471	7579472	G	snp	tv	0.669230769231	9	25	31	1	0.28998347925	TP53	4	ENST00000269305	cCc/cGc	p.Pro72Arg/c.215C>G	393	None	protein_coding	missense_variant	MED	1	rs1042522	1	0.74523255814	0.630036911719	1	0.7147	0.542931	1	0.659	0.65995997486	0.734480897259	1	None	0	0	0.82	8.32	0.722319	uncertain	benign
y109b.AUMV1	27	12	15	G/C	99.0	696	chr17	7579471	7579472	G	snp	tv	0.669230769231	9	25	31	1	0.28998347925	TP53	4	ENST00000269305	cCc/cGc	p.Pro72Arg/c.215C>G	393	None	protein_coding	missense_variant	MED	1	rs1042522	1	0.74523255814	0.630036911719	1	0.7147	0.542931	1	0.659	0.65995997486	0.734480897259	1	None	0	0	0.82	8.32	0.722319	uncertain	benign
y110b.AUMV1	18	8	10	G/C	99.0	696	chr17	7579471	7579472	G	snp	tv	0.669230769231	9	25	31	1	0.28998347925	TP53	4	ENST00000269305	cCc/cGc	p.Pro72Arg/c.215C>G	393	None	protein_coding	missense_variant	MED	1	rs1042522	1	0.74523255814	0.630036911719	1	0.7147	0.542931	1	0.659	0.65995997486	0.734480897259	1	None	0	0	0.82	8.32	0.722319	uncertain	benign
y68.ATR2U	146	84	62	G/C	99.0	696	chr17	7579471	7579472	G	snp	tv	0.669230769231	9	25	31	1	0.28998347925	TP53	4	ENST00000269305	cCc/cGc	p.Pro72Arg/c.215C>G	393	None	protein_coding	missense_variant	MED	1	rs1042522	1	0.74523255814	0.630036911719	1	0.7147	0.542931	1	0.659	0.65995997486	0.734480897259	1	None	0	0	0.82	8.32	0.722319	uncertain	benign
1.ATR2U	201	0	201	C/C	99.0	696	chr17	7579471	7579472	G	snp	tv	0.669230769231	9	25	31	1	0.28998347925	TP53	4	ENST00000269305	cCc/cGc	p.Pro72Arg/c.215C>G	393	None	protein_coding	missense_variant	MED	1	rs1042522	1	0.74523255814	0.630036911719	1	0.7147	0.542931	1	0.659	0.65995997486	0.734480897259	1	None	0	0	0.82	8.32	0.722319	uncertain	benign
22.AUMV1	227	6	221	C/C	99.0	696	chr17	7579471	7579472	G	snp	tv	0.669230769231	9	25	31	1	0.28998347925	TP53	4	ENST00000269305	cCc/cGc	p.Pro72Arg/c.215C>G	393	None	protein_coding	missense_variant	MED	1	rs1042522	1	0.74523255814	0.630036911719	1	0.7147	0.542931	1	0.659	0.65995997486	0.734480897259	1	None	0	0	0.82	8.32	0.722319	uncertain	benign
26.ATU14	179	13	166	C/C	99.0	696	chr17	7579471	7579472	G	snp	tv	0.669230769231	9	25	31	1	0.28998347925	TP53	4	ENST00000269305	cCc/cGc	p.Pro72Arg/c.215C>G	393	None	protein_coding	missense_variant	MED	1	rs1042522	1	0.74523255814	0.630036911719	1	0.7147	0.542931	1	0.659	0.65995997486	0.734480897259	1	None	0	0	0.82	8.32	0.722319	uncertain	benign
5.ATR2U	248	0	248	C/C	99.0	696	chr17	7579471	7579472	G	snp	tv	0.669230769231	9	25	31	1	0.28998347925	TP53	4	ENST00000269305	cCc/cGc	p.Pro72Arg/c.215C>G	393	None	protein_coding	missense_variant	MED	1	rs1042522	1	0.74523255814	0.630036911719	1	0.7147	0.542931	1	0.659	0.65995997486	0.734480897259	1	None	0	0	0.82	8.32	0.722319	uncertain	benign
63n.AUMV1	101	0	101	C/C	99.0	696	chr17	7579471	7579472	G	snp	tv	0.669230769231	9	25	31	1	0.28998347925	TP53	4	ENST00000269305	cCc/cGc	p.Pro72Arg/c.215C>G	393	None	protein_coding	missense_variant	MED	1	rs1042522	1	0.74523255814	0.630036911719	1	0.7147	0.542931	1	0.659	0.65995997486	0.734480897259	1	None	0	0	0.82	8.32	0.722319	uncertain	benign
7.A8P8B	210	0	210	C/C	99.0	696	chr17	7579471	7579472	G	snp	tv	0.669230769231	9	25	31	1	0.28998347925	TP53	4	ENST00000269305	cCc/cGc	p.Pro72Arg/c.215C>G	393	None	protein_coding	missense_variant	MED	1	rs1042522	1	0.74523255814	0.630036911719	1	0.7147	0.542931	1	0.659	0.65995997486	0.734480897259	1	None	0	0	0.82	8.32	0.722319	uncertain	benign
BS2.ATU14	44	0	44	C/C	99.0	696	chr17	7579471	7579472	G	snp	tv	0.669230769231	9	25	31	1	0.28998347925	TP53	4	ENST00000269305	cCc/cGc	p.Pro72Arg/c.215C>G	393	None	protein_coding	missense_variant	MED	1	rs1042522	1	0.74523255814	0.630036911719	1	0.7147	0.542931	1	0.659	0.65995997486	0.734480897259	1	None	0	0	0.82	8.32	0.722319	uncertain	benign
PS2.A8P8B	73	0	73	C/C	99.0	696	chr17	7579471	7579472	G	snp	tv	0.669230769231	9	25	31	1	0.28998347925	TP53	4	ENST00000269305	cCc/cGc	p.Pro72Arg/c.215C>G	393	None	protein_coding	missense_variant	MED	1	rs1042522	1	0.74523255814	0.630036911719	1	0.7147	0.542931	1	0.659	0.65995997486	0.734480897259	1	None	0	0	0.82	8.32	0.722319	uncertain	benign
SA23.ATU14	68	2	66	C/C	99.0	696	chr17	7579471	7579472	G	snp	tv	0.669230769231	9	25	31	1	0.28998347925	TP53	4	ENST00000269305	cCc/cGc	p.Pro72Arg/c.215C>G	393	None	protein_coding	missense_variant	MED	1	rs1042522	1	0.74523255814	0.630036911719	1	0.7147	0.542931	1	0.659	0.65995997486	0.734480897259	1	None	0	0	0.82	8.32	0.722319	uncertain	benign
Y105.ATU14	26	0	26	C/C	78.0	696	chr17	7579471	7579472	G	snp	tv	0.669230769231	9	25	31	1	0.28998347925	TP53	4	ENST00000269305	cCc/cGc	p.Pro72Arg/c.215C>G	393	None	protein_coding	missense_variant	MED	1	rs1042522	1	0.74523255814	0.630036911719	1	0.7147	0.542931	1	0.659	0.65995997486	0.734480897259	1	None	0	0	0.82	8.32	0.722319	uncertain	benign
Y135.ATU14	279	2	277	C/C	99.0	696	chr17	7579471	7579472	G	snp	tv	0.669230769231	9	25	31	1	0.28998347925	TP53	4	ENST00000269305	cCc/cGc	p.Pro72Arg/c.215C>G	393	None	protein_coding	missense_variant	MED	1	rs1042522	1	0.74523255814	0.630036911719	1	0.7147	0.542931	1	0.659	0.65995997486	0.734480897259	1	None	0	0	0.82	8.32	0.722319	uncertain	benign
Y137B.ATU14	51	0	51	C/C	99.0	696	chr17	7579471	7579472	G	snp	tv	0.669230769231	9	25	31	1	0.28998347925	TP53	4	ENST00000269305	cCc/cGc	p.Pro72Arg/c.215C>G	393	None	protein_coding	missense_variant	MED	1	rs1042522	1	0.74523255814	0.630036911719	1	0.7147	0.542931	1	0.659	0.65995997486	0.734480897259	1	None	0	0	0.82	8.32	0.722319	uncertain	benign
Y146B.A8P8B	33	0	33	C/C	96.0	696	chr17	7579471	7579472	G	snp	tv	0.669230769231	9	25	31	1	0.28998347925	TP53	4	ENST00000269305	cCc/cGc	p.Pro72Arg/c.215C>G	393	None	protein_coding	missense_variant	MED	1	rs1042522	1	0.74523255814	0.630036911719	1	0.7147	0.542931	1	0.659	0.65995997486	0.734480897259	1	None	0	0	0.82	8.32	0.722319	uncertain	benign
Y167B.A8P8B	59	0	59	C/C	99.0	696	chr17	7579471	7579472	G	snp	tv	0.669230769231	9	25	31	1	0.28998347925	TP53	4	ENST00000269305	cCc/cGc	p.Pro72Arg/c.215C>G	393	None	protein_coding	missense_variant	MED	1	rs1042522	1	0.74523255814	0.630036911719	1	0.7147	0.542931	1	0.659	0.65995997486	0.734480897259	1	None	0	0	0.82	8.32	0.722319	uncertain	benign
ps4.AL9E5	79	0	79	C/C	99.0	696	chr17	7579471	7579472	G	snp	tv	0.669230769231	9	25	31	1	0.28998347925	TP53	4	ENST00000269305	cCc/cGc	p.Pro72Arg/c.215C>G	393	None	protein_coding	missense_variant	MED	1	rs1042522	1	0.74523255814	0.630036911719	1	0.7147	0.542931	1	0.659	0.65995997486	0.734480897259	1	None	0	0	0.82	8.32	0.722319	uncertain	benign
ps6.AUMV1	29	0	29	C/C	86.0	696	chr17	7579471	7579472	G	snp	tv	0.669230769231	9	25	31	1	0.28998347925	TP53	4	ENST00000269305	cCc/cGc	p.Pro72Arg/c.215C>G	393	None	protein_coding	missense_variant	MED	1	rs1042522	1	0.74523255814	0.630036911719	1	0.7147	0.542931	1	0.659	0.65995997486	0.734480897259	1	None	0	0	0.82	8.32	0.722319	uncertain	benign
sa14.AL9E5	122	0	122	C/C	99.0	696	chr17	7579471	7579472	G	snp	tv	0.669230769231	9	25	31	1	0.28998347925	TP53	4	ENST00000269305	cCc/cGc	p.Pro72Arg/c.215C>G	393	None	protein_coding	missense_variant	MED	1	rs1042522	1	0.74523255814	0.630036911719	1	0.7147	0.542931	1	0.659	0.65995997486	0.734480897259	1	None	0	0	0.82	8.32	0.722319	uncertain	benign
sa39.AL9E5	23	0	23	C/C	69.0	696	chr17	7579471	7579472	G	snp	tv	0.669230769231	9	25	31	1	0.28998347925	TP53	4	ENST00000269305	cCc/cGc	p.Pro72Arg/c.215C>G	393	None	protein_coding	missense_variant	MED	1	rs1042522	1	0.74523255814	0.630036911719	1	0.7147	0.542931	1	0.659	0.65995997486	0.734480897259	1	None	0	0	0.82	8.32	0.722319	uncertain	benign
y103.AUMV1	283	0	283	C/C	99.0	696	chr17	7579471	7579472	G	snp	tv	0.669230769231	9	25	31	1	0.28998347925	TP53	4	ENST00000269305	cCc/cGc	p.Pro72Arg/c.215C>G	393	None	protein_coding	missense_variant	MED	1	rs1042522	1	0.74523255814	0.630036911719	1	0.7147	0.542931	1	0.659	0.65995997486	0.734480897259	1	None	0	0	0.82	8.32	0.722319	uncertain	benign
y104.ATR2U	36	0	36	C/C	99.0	696	chr17	7579471	7579472	G	snp	tv	0.669230769231	9	25	31	1	0.28998347925	TP53	4	ENST00000269305	cCc/cGc	p.Pro72Arg/c.215C>G	393	None	protein_coding	missense_variant	MED	1	rs1042522	1	0.74523255814	0.630036911719	1	0.7147	0.542931	1	0.659	0.65995997486	0.734480897259	1	None	0	0	0.82	8.32	0.722319	uncertain	benign
y128b.AUMV1	182	0	182	C/C	99.0	696	chr17	7579471	7579472	G	snp	tv	0.669230769231	9	25	31	1	0.28998347925	TP53	4	ENST00000269305	cCc/cGc	p.Pro72Arg/c.215C>G	393	None	protein_coding	missense_variant	MED	1	rs1042522	1	0.74523255814	0.630036911719	1	0.7147	0.542931	1	0.659	0.65995997486	0.734480897259	1	None	0	0	0.82	8.32	0.722319	uncertain	benign
y132b.AUMV1	39	1	38	C/C	82.0	696	chr17	7579471	7579472	G	snp	tv	0.669230769231	9	25	31	1	0.28998347925	TP53	4	ENST00000269305	cCc/cGc	p.Pro72Arg/c.215C>G	393	None	protein_coding	missense_variant	MED	1	rs1042522	1	0.74523255814	0.630036911719	1	0.7147	0.542931	1	0.659	0.65995997486	0.734480897259	1	None	0	0	0.82	8.32	0.722319	uncertain	benign
y134b.AL9E5	82	0	82	C/C	99.0	696	chr17	7579471	7579472	G	snp	tv	0.669230769231	9	25	31	1	0.28998347925	TP53	4	ENST00000269305	cCc/cGc	p.Pro72Arg/c.215C>G	393	None	protein_coding	missense_variant	MED	1	rs1042522	1	0.74523255814	0.630036911719	1	0.7147	0.542931	1	0.659	0.65995997486	0.734480897259	1	None	0	0	0.82	8.32	0.722319	uncertain	benign
y144c.AUMV1	83	0	83	C/C	99.0	696	chr17	7579471	7579472	G	snp	tv	0.669230769231	9	25	31	1	0.28998347925	TP53	4	ENST00000269305	cCc/cGc	p.Pro72Arg/c.215C>G	393	None	protein_coding	missense_variant	MED	1	rs1042522	1	0.74523255814	0.630036911719	1	0.7147	0.542931	1	0.659	0.65995997486	0.734480897259	1	None	0	0	0.82	8.32	0.722319	uncertain	benign
y162c.ATR2U	15	0	15	C/C	45.0	696	chr17	7579471	7579472	G	snp	tv	0.669230769231	9	25	31	1	0.28998347925	TP53	4	ENST00000269305	cCc/cGc	p.Pro72Arg/c.215C>G	393	None	protein_coding	missense_variant	MED	1	rs1042522	1	0.74523255814	0.630036911719	1	0.7147	0.542931	1	0.659	0.65995997486	0.734480897259	1	None	0	0	0.82	8.32	0.722319	uncertain	benign
y179f.AL9E5	112	2	110	C/C	99.0	696	chr17	7579471	7579472	G	snp	tv	0.669230769231	9	25	31	1	0.28998347925	TP53	4	ENST00000269305	cCc/cGc	p.Pro72Arg/c.215C>G	393	None	protein_coding	missense_variant	MED	1	rs1042522	1	0.74523255814	0.630036911719	1	0.7147	0.542931	1	0.659	0.65995997486	0.734480897259	1	None	0	0	0.82	8.32	0.722319	uncertain	benign
y183b.AUMV1	39	0	39	C/C	99.0	696	chr17	7579471	7579472	G	snp	tv	0.669230769231	9	25	31	1	0.28998347925	TP53	4	ENST00000269305	cCc/cGc	p.Pro72Arg/c.215C>G	393	None	protein_coding	missense_variant	MED	1	rs1042522	1	0.74523255814	0.630036911719	1	0.7147	0.542931	1	0.659	0.65995997486	0.734480897259	1	None	0	0	0.82	8.32	0.722319	uncertain	benign
y188b.AUMV1	31	0	31	C/C	92.0	696	chr17	7579471	7579472	G	snp	tv	0.669230769231	9	25	31	1	0.28998347925	TP53	4	ENST00000269305	cCc/cGc	p.Pro72Arg/c.215C>G	393	None	protein_coding	missense_variant	MED	1	rs1042522	1	0.74523255814	0.630036911719	1	0.7147	0.542931	1	0.659	0.65995997486	0.734480897259	1	None	0	0	0.82	8.32	0.722319	uncertain	benign
y199b.AL9E5	81	0	81	C/C	99.0	696	chr17	7579471	7579472	G	snp	tv	0.669230769231	9	25	31	1	0.28998347925	TP53	4	ENST00000269305	cCc/cGc	p.Pro72Arg/c.215C>G	393	None	protein_coding	missense_variant	MED	1	rs1042522	1	0.74523255814	0.630036911719	1	0.7147	0.542931	1	0.659	0.65995997486	0.734480897259	1	None	0	0	0.82	8.32	0.722319	uncertain	benign
y3.AUMV1	42	2	40	C/C	75.0	696	chr17	7579471	7579472	G	snp	tv	0.669230769231	9	25	31	1	0.28998347925	TP53	4	ENST00000269305	cCc/cGc	p.Pro72Arg/c.215C>G	393	None	protein_coding	missense_variant	MED	1	rs1042522	1	0.74523255814	0.630036911719	1	0.7147	0.542931	1	0.659	0.65995997486	0.734480897259	1	None	0	0	0.82	8.32	0.722319	uncertain	benign
[truncated: 15 more columns]
